# Supplementary material for: [Au(Np#)Cl]: highly reactive and broadly applicable Au(i)–NHC catalysts for alkyne π-activation reactions
Source: Royal Society of Chemistry journal article supplement (doi:10.1039/d3cy00717k), 2023-01-01
Supplement: d3cy00717k1.pdf [file d3cy00717k1.pdf]

## Supporting Information

# [Au(Np<sup>#</sup>)Cl]: Highly Reactive and Broadly Applicable Au(I)–NHC Catalysts for Alkyne $\pi$ -Activation Reactions

Md. Mahbubur Rahman,<sup>†</sup> Pengcheng Gao,<sup>†</sup> Qun Zhao,<sup>†</sup> Roger Lalancette,<sup>†</sup> Roman Szostak,<sup>‡</sup>  
and Michal Szostak<sup>\*,†</sup>

<sup>†</sup>Department of Chemistry, Rutgers University, 73 Warren Street, Newark, NJ 07102, USA

<sup>‡</sup>Department of Chemistry, Wroclaw University, F. Joliot-Curie 14, Wroclaw 50-383, Poland

[michal.szostak@rutgers.edu](mailto:michal.szostak@rutgers.edu)

|                                                                        |     |
|------------------------------------------------------------------------|-----|
| <b>Table of Contents</b>                                               | S1  |
| List of Known Compounds/General Methods                                | S2  |
| Experimental Procedures and Characterization Data                      | S3  |
| Crystallographic Studies                                               | S24 |
| Computational Methods                                                  | S29 |
| References                                                             | S34 |
| <sup>1</sup> H and <sup>13</sup> C NMR Spectra                         | S36 |
| Cartesian Coordinates with Zero-Point Energies and Thermal Corrections | S85 |

### Corresponding Author:

Prof. Dr. M. Szostak

Department of Chemistry, Rutgers University

73 Warren Street, Newark, NJ 07102, United States

E-mail: [michal.szostak@rutgers.edu](mailto:michal.szostak@rutgers.edu)

## **List of Known Compounds/General Methods**

All starting materials reported in the manuscript have been previously described in literature and prepared by the method reported previously unless stated otherwise. All experiments were performed using standard Schlenk techniques under nitrogen or argon unless stated otherwise. All solvents were purchased at the highest commercial grade and used as received or after purification by passing through activated alumina columns or distillation from sodium/benzophenone under nitrogen. All solvents were deoxygenated prior to use. All other chemicals were purchased at the highest commercial grade and used as received. Reaction glassware was oven-dried at 140 °C for at least 24 h or flame-dried prior to use, allowed to cool under vacuum and purged with argon (three cycles). All products were identified using <sup>1</sup>H NMR analysis and comparison with authentic samples. GC and/or GC/MS analysis was used for volatile products. All yields refer to yields determined by <sup>1</sup>H NMR and/or GC or GC/MS using an internal standard (optimization) and isolated yields (preparative runs) unless stated otherwise. <sup>1</sup>H NMR and <sup>13</sup>C NMR spectra were recorded in CDCl<sub>3</sub> on Bruker spectrometers at 500 (<sup>1</sup>H NMR) and 125 MHz (<sup>13</sup>C NMR). All shifts are reported in parts per million (ppm) relative to residual CHCl<sub>3</sub> peak (7.26 and 77.36 ppm, <sup>1</sup>H NMR and <sup>13</sup>C NMR, respectively). All coupling constants (*J*) are reported in hertz (Hz). Abbreviations are: s, singlet; d, doublet; t, triplet; q, quartet; brs, broad singlet. GC-MS chromatography was performed using Agilent HP6890 GC System and Agilent 5973A inert XL EI/CI MSD using helium as the carrier gas at a flow rate of 1 mL/min and an initial oven temperature of 50 °C. The injector temperature was 250 °C. The detector temperature was 250 °C. For runs with the initial oven temperature of 50 °C, temperature was increased with a 10 °C/min ramp after 50 °C hold for 3 min to a final temperature of 220 °C, then hold at 220 °C for 15 min (split less mode of injection, total run time of 22.0 min). High-resolution mass spectra (HRMS) were measured on a 7T Bruker Daltonics FT-MS instrument. All flash chromatography was performed using silica gel, 60 Å, 300 mesh. TLC analysis was carried out on glassplates coated with silica gel 60 F254, 0.2 mm thickness. The plates were visualized using a 254 nm UV lamp or aqueous potassium permanganate. <sup>1</sup>H NMR and <sup>13</sup>C NMR data are given for all compounds in the Supporting Experimental for characterization purposes. <sup>1</sup>H NMR, <sup>13</sup>C NMR, and HRMS data are given for all new compounds. All products have been previously reported, unless stated otherwise.

## Experimental Procedures and Characterization Data

The ligands, **IPr<sup>#</sup>·HCl**,<sup>1</sup> **NP<sup>#</sup>·HCl**<sup>1</sup> and **BIAN-IPr<sup>#</sup>·HCl**<sup>1</sup> are commercially available and previously reported in the literature. The compounds **1**,<sup>1</sup> **4**,<sup>2</sup> **5**,<sup>3</sup> **8a**,<sup>4</sup> **8b**,<sup>4</sup> **8d**,<sup>5</sup> **8e**,<sup>4</sup> **8h**,<sup>4</sup> **8n**,<sup>6</sup> **10a**,<sup>8</sup> **10b**,<sup>7,11</sup> **10c**,<sup>9</sup> **10d**,<sup>10</sup> **10e**,<sup>12</sup> **10f**,<sup>7</sup> **10g**,<sup>13</sup> **10h**,<sup>11,14</sup> **10i**,<sup>7,11</sup> **10j**,<sup>11</sup> **10k**,<sup>11</sup> **10l**,<sup>7</sup> **10m**,<sup>11</sup> **10n**,<sup>14</sup> **10o**,<sup>13</sup> **11a**,<sup>16</sup> **11b**,<sup>15,16,17</sup> **11c**,<sup>15,16,17</sup> **11d**,<sup>15</sup> **11e**,<sup>16</sup> **11f**,<sup>16,17</sup> **11g**,<sup>18</sup> **11h**<sup>17</sup> and **11i**<sup>15,16</sup> have been previously reported in the literature. Spectroscopic properties matched literature data.

**A. General Procedure for the Synthesis of [Au(NHC)Cl] Complexes.** An oven-dried pressure tube equipped with a stir bar was charged with NHC·HCl salt (0.11 mmol, 1.1 equiv), [Au(Me<sub>2</sub>S)Cl] (0.1 mmol, 1.0 equiv) and K<sub>2</sub>CO<sub>3</sub> (0.5 mmol, 5.0 equiv), placed under a positive pressure of argon, and subjected to three evacuation/backfilling cycles under high vacuum. Acetone or THF (2.0 mL, 0.05 M) was added, and the reaction mixture was stirred at 60 °C for 15 h. After the indicated time, the reaction mixture was diluted with CH<sub>2</sub>Cl<sub>2</sub> (10 mL) and filtered. The solution was collected and concentrated. The title product was obtained by trituration from hexanes as a solid.

**B. [Au(NHC)Cl] Catalyzed Hydrocarboxylation of Alkynes:** An oven-dried pressure tube equipped with a stir bar was charged with an alkyne substrate (0.2 mmol, 1.0 equiv), a carboxylic acid derivative (0.25 mmol, 1.25 equiv), [Au-NHC] complex (2.0 mol%) and NaBAR<sup>F</sup><sub>4</sub> (4.0 mol%). Toluene (0.2 mL, 1.0 M) was added, and the pressure tube was sealed under air atmosphere and placed in a pre-heated oil bath at 80 °C. After 25 h, the solvent was removed under reduced pressure. The sample was analyzed by <sup>1</sup>H NMR (CDCl<sub>3</sub>, 500 MHz) and GC-MS to obtain conversion, selectivity and yield using internal standard and comparison with authentic samples. The product was purified by flash column using natural silica as stationary phase and EtOAc/Hexane (1/30 v/v) as eluent.

**C. [Au(NHC)Cl] Catalyzed Hydroamination of Alkynes:** An oven-dried pressure tube equipped with a stir bar was charged with an alkyne substrate (0.5 mmol, 1.0 equiv), an aniline derivative (0.6 mmol, 1.2 equiv), [Au-NHC] complex (1.5 mol%) and NaBAR<sup>F</sup><sub>4</sub> (3.0 mol%). The pressure tube was sealed under air atmosphere and placed in a pre-heated oil bath at 50 °C for 15 hours. After the indicated time, the reaction mixture was cooled to room temperature. The sample was analyzed by <sup>1</sup>H NMR (CDCl<sub>3</sub>, 500 MHz) and GC-MS to obtain conversion, selectivity and yield using internal standard and comparison with authentic samples. The crude

product was dissolved in THF/MeOH (10 mL / 5 mL) and placed on ice bath. NaBH<sub>4</sub> (3.0 mmol, 6.0 equiv) was added slowly to the mixture with continuous stirring. After 2 hours, the solvent was removed, and saturate NaHCO<sub>3</sub> solution (10 mL) was added. The product was extracted by EtOAc (3 x 10 mL), and the combined organic layer was dried and concentrated. The product was purified by flash column using natural silica as stationary phase and EtOAc/Hexane (1/15 v/v) as eluent.

**D. [Au(NHC)Cl] Catalyzed Addition Hydration of Alkynes:** An oven-dried pressure tube equipped with a stir bar was charged with an alkyne substrate (0.5 mmol) [Au-NHC] complex (50.0 ppm), AgSbF<sub>6</sub> (spatula top) and methanol (1.0 mL, 0.5 M). the pressure tube was sealed under air atmosphere and stirred for 1 min. Water (0.2 mL) was added, and the pressure tube was placed in a pre-heated oil bath at 80 °C. After 15 hours, water (5.0 mL) was added, and the product was extracted by ethyl ether or *n*-pentane (3 x 10 mL), and the combined organic layer was dried and concentrated. The sample was analyzed by <sup>1</sup>H NMR (CDCl<sub>3</sub>, 500 MHz) and GC-MS to obtain conversion, selectivity and yield using internal standard and comparison with authentic samples. Majorities of products did not require further purification. For very few substrates, the product was purified by flash column using natural silica as stationary phase and EtOAc (or ethyl ether)/Hexane (1/100 v/v) as eluent.

**E. [Au(NHC)Cl] Catalyzed Hydroamination of Alkynes on Gram Scale:** An oven-dried pressure tube equipped with a stir bar was charged with phenylacetylene (1.02 g, 10.0 mmol, 1.0 equiv), aniline (1.12 g, 12.0 mmol, 1.2 equiv), [Au(Np<sup>#</sup>)Cl] complex (15.5 mg, 0.1 mol%) and Na[BAr<sup>F</sup>]<sub>4</sub> (18.0 mg, 0.2 mol%). The pressure tube was sealed under air atmosphere and placed in a pre-heated oil bath at 50 °C for 15 hours. After the indicated time, the reaction mixture was cooled to room temperature. The reaction mixture was dissolved in THF (100 mL) and placed on ice bath. NaBH<sub>4</sub> (1.52 g, 40.0 mmol, 4.0 equiv) was added slowly to the mixture with continuous stirring. Finally, MeOH (50 mL) was added to the system slowly over 10 min with continuous stirring. After 5 hours, the solvent was removed, and saturate NaHCO<sub>3</sub> solution was added to quince the reduction reaction. The organic layer was extracted by EtOAc (3 x 50 mL), and the combined organic layer was dried and concentrated. The crude product was purified by flash column using natural silica as stationary phase and EtOAc/Hexane (1/15 v/v) as eluent to offer pure product as oil (1.76 g, 89%).

## F. Characterization Data of [Au(NHC)Cl] Complexes.

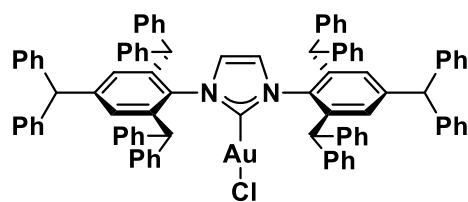

1: [Au(IPr<sup>#</sup>)Cl]

[Au(IPr<sup>#</sup>)Cl] **1**: White Solid. Yield 90% (131.0 mg). Decomposed at >200 °C. <sup>1</sup>H NMR (500 MHz, CDCl<sub>3</sub>)  $\delta$  7.19 (t,  $J$  = 7.3 Hz, 8H), 7.16 – 7.10 (m, 16H), 7.09 – 7.04 (m, 12H), 6.98 – 6.93 (m, 16H), 6.79 (d,  $J$  = 4.2 Hz, 4H), 6.77 (d,  $J$  = 6.6 Hz, 8H), 5.89 (s, 2H), 5.39 (s, 2H), 5.25 (s, 4H). <sup>13</sup>C NMR (126 MHz, CDCl<sub>3</sub>)  $\delta$  175.34 (C-Au), 145.98 (C<sub>Ar</sub>), 143.10 (C<sub>Ar</sub>), 142.93 (C<sub>Ar</sub>), 142.16 (C<sub>Ar</sub>), 141.03 (C<sub>Ar</sub>), 134.30 (C<sub>Ar</sub>), 130.95 (C<sub>Ar</sub>), 129.55 (C<sub>Ar</sub>), 129.38 (C<sub>Ar</sub>), 129.36 (C<sub>Ar</sub>), 128.53 (C<sub>Ar</sub>), 128.50 (C<sub>Ar</sub>), 128.44 (C<sub>Ar</sub>), 126.73 (C<sub>Ar</sub>), 126.64 (C<sub>Ar</sub>), 126.48 (C<sub>Ar</sub>), 123.22 (C<sub>imi</sub>), 56.28 (Ph<sub>2</sub>CH), 51.39 (Ph<sub>2</sub>CH).

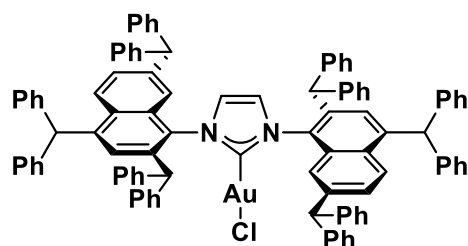

2: [Au(NP<sup>#</sup>)Cl]

[Au(Np<sup>#</sup>)Cl] **2**: White Solid. Yield 75% (116.0 mg). Decomposed at >200 °C. <sup>1</sup>H NMR (500 MHz, CDCl<sub>3</sub>)  $\delta$  7.90 (dd,  $J$  = 9.3, 7.2 Hz, 2H), 7.34 (d,  $J$  = 1.8 Hz, 1H), 7.19 – 7.12 (m, 8H), 7.10 – 6.89 (m, 34H), 6.89 – 6.74 (m, 16H), 6.72 (s, 1H), 6.69 – 6.66 (m, 1H), 6.63 (s, 1H), 6.56 – 6.52 (m, 2H), 6.49 (s, 1H), 6.30 (s, 1H), 6.08 (d,  $J$  = 3.6 Hz, 2H), 5.53 – 5.30 (m, 4H). <sup>13</sup>C NMR (126 MHz, CDCl<sub>3</sub>)  $\delta$  176.13 (C-Au), 176.01 (C-Au), 143.29 (C<sub>Ar</sub>), 143.23 (C<sub>Ar</sub>), 143.20 (C<sub>Ar</sub>), 143.08 (C<sub>Ar</sub>), 142.98 (C<sub>Ar</sub>), 142.82 (C<sub>Ar</sub>), 142.72 (C<sub>Ar</sub>), 142.52 (C<sub>Ar</sub>), 142.45 (C<sub>Ar</sub>), 142.37 (C<sub>Ar</sub>), 142.27 (C<sub>Ar</sub>), 142.23 (C<sub>Ar</sub>), 141.84 (C<sub>Ar</sub>), 141.81 (C<sub>Ar</sub>), 141.76 (C<sub>Ar</sub>), 138.82 (C<sub>Ar</sub>), 138.18 (C<sub>Ar</sub>), 131.40 (C<sub>Ar</sub>), 131.37 (C<sub>Ar</sub>), 130.80 (C<sub>Ar</sub>), 130.75 (C<sub>Ar</sub>), 130.32 (C<sub>Ar</sub>), 129.99 (C<sub>Ar</sub>), 129.44 (C<sub>Ar</sub>), 129.36 (C<sub>Ar</sub>), 129.30 (C<sub>Ar</sub>), 129.22 (C<sub>Ar</sub>), 128.90 (C<sub>Ar</sub>), 128.58 (C<sub>Ar</sub>), 128.47 (C<sub>Ar</sub>), 128.42 (C<sub>Ar</sub>), 128.35 (C<sub>Ar</sub>), 128.28 (C<sub>Ar</sub>), 126.66 (C<sub>Ar</sub>), 126.63 (C<sub>Ar</sub>), 126.58 (C<sub>Ar</sub>), 126.53 (C<sub>Ar</sub>), 126.47 (C<sub>Ar</sub>), 126.43 (C<sub>Ar</sub>), 126.34 (C<sub>Ar</sub>), 125.27 (C<sub>Ar</sub>), 125.16 (C<sub>Ar</sub>), 123.87 (C<sub>Ar</sub>), 123.71 (C<sub>Ar</sub>), 122.89 (C<sub>imi</sub>), 122.79 (C<sub>imi</sub>), 57.40 (Ph<sub>2</sub>CH), 57.22 (Ph<sub>2</sub>CH), 53.47 (Ph<sub>2</sub>CH), 53.31 (Ph<sub>2</sub>CH), 51.73 (Ph<sub>2</sub>CH), 51.30 (Ph<sub>2</sub>CH). HRMS (ESI)  $m/z$ : [M – Cl]<sup>+</sup> Calcd for C<sub>101</sub>H<sub>76</sub>N<sub>2</sub>Au 1513.5669; Found 1513.5698.

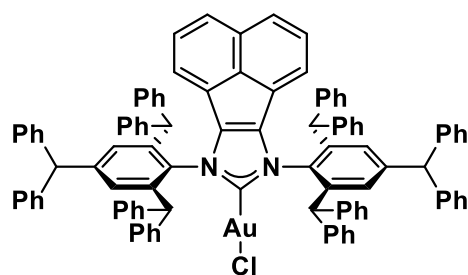3: [Au(BIAN-IPr<sup>#</sup>)Cl]

[Au(BIAN-IPr<sup>#</sup>)Cl] **3**: Yellow Solid. Yield 78% (123.0 mg). Decomposed at >200 °C. <sup>1</sup>H NMR (500 MHz, CDCl<sub>3</sub>)  $\delta$  7.53 (d,  $J$  = 8.2 Hz, 2H), 7.24 (t,  $J$  = 7.4 Hz, 8H), 7.18 (t,  $J$  = 7.3 Hz, 4H), 7.03 – 6.91 (m, 34H), 6.74 (t,  $J$  = 7.2 Hz, 4H), 6.68 (t,  $J$  = 7.3 Hz, 8H), 6.61 (d,  $J$  = 7.2 Hz, 8H), 6.08 (d,  $J$  = 6.9 Hz, 2H), 5.48 (s, 2H), 5.42 (s, 4H). <sup>13</sup>C NMR (126 MHz, CDCl<sub>3</sub>)  $\delta$  179.71 (C-Au), 145.91 (C<sub>Ar</sub>), 143.22 (C<sub>Ar</sub>), 142.01 (C<sub>Ar</sub>), 141.78 (C<sub>Ar</sub>), 141.67 (C<sub>Ar</sub>), 138.30 (C<sub>Ar</sub>), 133.52 (C<sub>Ar</sub>), 131.07 (C<sub>Ar</sub>), 129.63 (C<sub>Ar</sub>), 129.45 (C<sub>Ar</sub>), 129.43 (C<sub>Ar</sub>), 128.51 (C<sub>Ar</sub>), 128.38 (C<sub>Ar</sub>), 128.03 (C<sub>Ar</sub>), 127.41 (C<sub>Ar</sub>), 126.53 (C<sub>Ar</sub>), 126.50 (C<sub>Ar</sub>), 126.36 (C<sub>Ar</sub>), 124.12 (C<sub>Ar</sub>), 121.76 (C<sub>Ar</sub>), 56.37 (Ph<sub>2</sub>CH), 51.58 (Ph<sub>2</sub>CH). HRMS (ESI)  $m/z$ : [M – Cl]<sup>+</sup> Calcd for C<sub>103</sub>H<sub>76</sub>N<sub>2</sub>Au 1537.5669; Found 1537.5139.

### G. Characterization Data of Carboxylic Acid Addition Products:

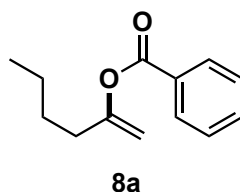

8a

**Compound 8a**: According to the general procedure the addition of benzoic acid (30.5 mg, 0.25 mmol) to 1-hexyne (16.5 mg, 0.20 mmol) afforded the title product (36.0 mg, 88%) as oil. <sup>1</sup>H NMR (500 MHz, CDCl<sub>3</sub>)  $\delta$  8.16 – 8.01 (m, 2H), 7.59 (t,  $J$  = 7.4 Hz, 1H), 7.47 (t,  $J$  = 7.8 Hz, 2H), 4.86 (d,  $J$  = 1.2 Hz, 1H), 4.84 (d,  $J$  = 1.1 Hz, 1H), 2.35 (t,  $J$  = 7.6 Hz, 2H), 1.56 – 1.49 (m, 2H), 1.43 – 1.35 (m, 2H), 0.92 (t,  $J$  = 7.3 Hz, 3H). <sup>13</sup>C NMR (126 MHz, CDCl<sub>3</sub>)  $\delta$  164.92 (CO), 156.96 (=C(O)-), 133.40 (C<sub>Ar</sub>), 130.06 (C<sub>Ar</sub>), 128.59 (C<sub>Ar</sub>), 101.44 (=CH<sub>2</sub>), 33.29 (CH<sub>2</sub>), 28.81 (CH<sub>2</sub>), 22.26 (CH<sub>2</sub>), 13.98 (CH<sub>3</sub>).

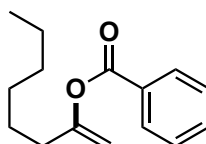**8b**

**Compound 8b:** According to the general procedure, the addition of benzoic acid (30.5 mg, 0.25 mmol) to 1-octyne (22.1 mg, 0.20 mmol) afforded the title product (40.0 mg, 86%) as oil. <sup>1</sup>H NMR (500 MHz, CDCl<sub>3</sub>)  $\delta$  8.18 – 7.95 (m, 2H), 7.59 (t,  $J$  = 7.4 Hz, 1H), 7.47 (t,  $J$  = 7.8 Hz, 2H), 4.86 (s, 1H), 4.83 (d,  $J$  = 0.9 Hz, 1H), 2.34 (t,  $J$  = 7.6 Hz, 2H), 1.53 (dt,  $J$  = 15.2, 7.4 Hz, 2H), 1.36 (dt,  $J$  = 14.6, 7.2 Hz, 2H), 1.32 – 1.25 (m, 4H), 0.88 (t,  $J$  = 6.9 Hz, 3H). <sup>13</sup>C NMR (126 MHz, CDCl<sub>3</sub>)  $\delta$  164.91 (CO), 156.98 (=C(O)–), 133.39 (C<sub>Ar</sub>), 130.06 (C<sub>Ar</sub>), 128.58 (C<sub>Ar</sub>), 101.44 (=CH<sub>2</sub>), 33.58 (CH<sub>2</sub>), 31.72 (CH<sub>2</sub>), 28.82 (CH<sub>2</sub>), 26.65 (CH<sub>2</sub>), 22.69 (CH<sub>2</sub>), 14.18 (CH<sub>3</sub>).

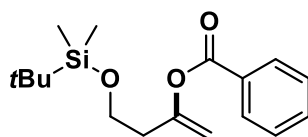**8c**

**Compound 8c:** According to the general procedure, the addition of benzoic acid (30.5 mg, 0.25 mmol) to 1-OTBS-butyn-3-yl (36.9 mg, 0.20 mmol) afforded the title product (55.0 mg, 90%) as oil. <sup>1</sup>H NMR (500 MHz, CDCl<sub>3</sub>)  $\delta$  8.16 – 7.97 (m, 2H), 7.59 (t,  $J$  = 7.4 Hz, 1H), 7.47 (t,  $J$  = 7.8 Hz, 2H), 4.94 (d,  $J$  = 1.4 Hz, 1H), 4.90 (s, 1H), 3.81 (t,  $J$  = 6.6 Hz, 2H), 2.57 (t,  $J$  = 6.6 Hz, 2H), 0.89 (s, 9H), 0.05 (s, 6H). <sup>13</sup>C NMR (126 MHz, CDCl<sub>3</sub>)  $\delta$  164.87 (CO), 153.92 (=C(O)–), 133.45 (C<sub>Ar</sub>), 130.08 (C<sub>Ar</sub>), 129.94 (C<sub>Ar</sub>), 128.59 (C<sub>Ar</sub>), 103.33 (=CH<sub>2</sub>), 60.51(OCH<sub>2</sub>), 37.40 (CH<sub>2</sub>), 26.01 (CH<sub>3</sub>), 18.43 (SiC<sub>tBu</sub>), -5.22 (SiCH<sub>3</sub>). HRMS (ESI)  $m/z$ : [M + H]<sup>+</sup> Calcd for C<sub>17</sub>H<sub>27</sub>O<sub>3</sub>Si 307.1724; Found 307.1690.

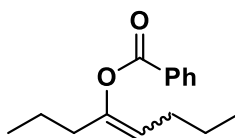**8d**

**Compound 8d:** According to the general procedure, the addition of benzoic acid (30.5 mg, 0.25 mmol) to 4-octyne (22.1 mg, 0.20 mmol) afforded the title product (31.0 mg, 67%) as oil. <sup>1</sup>H NMR (500 MHz, CDCl<sub>3</sub>)  $\delta$  8.11 (d,  $J$  = 7.1 Hz, 2H), 7.60 (t,  $J$  = 7.4 Hz, 1H), 7.48 (t,  $J$  = 7.7 Hz, 2H), 5.11 (t,  $J$  = 7.3 Hz, 1H), 2.28 (t,  $J$  = 7.2 Hz, 2H), 1.96 (q,  $J$  = 7.3 Hz, 2H), 1.56 –

1.48 (m, 2H), 1.43 – 1.34 (m, 2H), 0.95 (t,  $J = 7.4$  Hz, 3H), 0.88 (t,  $J = 7.4$  Hz, 3H). <sup>13</sup>C NMR (126 MHz, CDCl<sub>3</sub>)  $\delta$  164.60 (CO), 148.64 (=C(O)-), 133.31 (C<sub>Ar</sub>), 130.07 (C<sub>Ar</sub>), 128.60 (C<sub>Ar</sub>), 116.69 (=CH), 35.68 (CH<sub>2</sub>), 27.59 (CH<sub>2</sub>), 22.48 (CH<sub>2</sub>), 20.14 (CH<sub>2</sub>), 13.90(CH<sub>3</sub>), 13.70 (CH<sub>3</sub>).

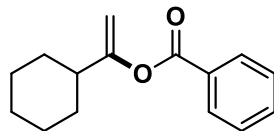

8e

**Compound 8e:** According to the general procedure, the addition of benzoic acid (30.5 mg, 0.25 mmol) to cyclohexylacetylene (21.6 mg, 0.20 mmol) afforded the title product (37.0 mg, 80%) as oil. <sup>1</sup>H NMR (500 MHz, CDCl<sub>3</sub>)  $\delta$  8.17 – 8.01 (m, 2H), 7.59 (t,  $J = 7.4$  Hz, 1H), 7.47 (t,  $J = 7.8$  Hz, 2H), 4.90 – 4.83 (m, 1H), 4.82 (d,  $J = 1.7$  Hz, 1H), 2.25 (td,  $J = 10.8, 3.1$  Hz, 1H), 1.99 (dd,  $J = 10.9, 10.0$  Hz, 2H), 1.77 (dt,  $J = 14.2, 7.3$  Hz, 2H), 1.69 (dd,  $J = 7.2, 5.8$  Hz, 1H), 1.31 – 1.16 (m, 5H). <sup>13</sup>C NMR (126 MHz, CDCl<sub>3</sub>)  $\delta$  165.04 (CO), 160.87 (=C(O)-), 133.38 (C<sub>Ar</sub>), 130.14 (C<sub>Ar</sub>), 130.08 (C<sub>Ar</sub>), 128.60 (C<sub>Ar</sub>), 99.82 (=CH<sub>2</sub>), 41.99 (CH<sub>2</sub>), 30.80 (CH<sub>2</sub>), 26.23 (CH<sub>2</sub>), 26.12 (CH<sub>Cy</sub>).

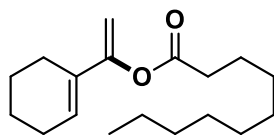

8f

**Compound 8f:** According to the general procedure, the addition of *n*-decanoic acid (43.1 mg, 0.25 mmol) to 1-ethynylcyclohexene (21.2 mg, 0.20 mmol) afforded the title product (44.0 mg, 79%) as oil. <sup>1</sup>H NMR (500 MHz, CDCl<sub>3</sub>)  $\delta$  4.71 (d,  $J = 1.2$  Hz, 1H), 4.65 (d,  $J = 1.5$  Hz, 1H), 2.39 (t,  $J = 7.5$  Hz, 2H), 2.08 (tt,  $J = 11.0, 2.6$  Hz, 1H), 1.88 (d,  $J = 12.0$  Hz, 2H), 1.79 – 1.72 (m, 2H), 1.67 – 1.63 (m, 3H), 1.34 – 1.23 (m, 13H), 1.19 – 1.14 (m, 2H), 0.88 (t,  $J = 6.9$  Hz, 3H). <sup>13</sup>C NMR (126 MHz, CDCl<sub>3</sub>)  $\delta$  172.39 (CO), 160.84 (=C(O)-), 132.65 (=C<sub>q(cy)</sub>), 120.11 (=CH-), 99.50 (=CH<sub>2</sub>), 41.99 (CH<sub>2</sub>), 34.71 (CH<sub>2</sub>), 33.16 (CH<sub>2</sub>), 32.10 (CH<sub>2</sub>), 30.85 (CH<sub>2</sub>), 29.67 (CH<sub>2</sub>), 29.49 (CH<sub>2</sub>), 29.35 (CH<sub>2</sub>), 26.34 (CH<sub>2</sub>), 26.22 (CH<sub>2</sub>), 25.25 (CH<sub>2</sub>), 22.90 (CH<sub>2</sub>), 14.33 (CH<sub>3</sub>). HRMS (ESI)  $m/z$ : [M + H]<sup>+</sup> Calcd for C<sub>18</sub>H<sub>31</sub>O<sub>2</sub> 279.2319; Found 279.2280.



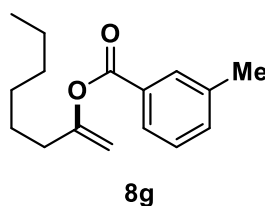

**Compound 8g:** According to the general procedure, the addition of 3-methylbenzoic acid (34.0 mg, 0.25 mmol) to 1-octyne (22.1 mg, 0.20 mmol) afforded the title product (35.0 mg, 71%) as oil. <sup>1</sup>H NMR (500 MHz, CDCl<sub>3</sub>)  $\delta$  7.95 – 7.82 (m, 2H), 7.40 (d,  $J$  = 7.5 Hz, 1H), 7.35 (t,  $J$  = 7.5 Hz, 1H), 4.84 (d,  $J$  = 1.1 Hz, 1H), 4.83 (d,  $J$  = 1.0 Hz, 1H), 2.42 (s, 3H), 2.33 (t,  $J$  = 7.6 Hz, 2H), 1.53 (dt,  $J$  = 15.2, 7.4 Hz, 2H), 1.36 (dt,  $J$  = 20.6, 7.0 Hz, 2H), 1.28 (ddd,  $J$  = 9.8, 8.6, 5.1 Hz, 4H), 0.88 (t,  $J$  = 6.9 Hz, 3H). <sup>13</sup>C NMR (126 MHz, CDCl<sub>3</sub>)  $\delta$  165.10 (CO), 157.05 (=C(O)-), 138.42 (C<sub>Ar</sub>), 134.17 (C<sub>Ar</sub>), 130.58 (C<sub>Ar</sub>), 129.98 (C<sub>Ar</sub>), 128.49 (C<sub>Ar</sub>), 127.22 (C<sub>Ar</sub>), 101.40 (=CH<sub>2</sub>), 33.58 (CH<sub>2</sub>), 31.73 (CH<sub>2</sub>), 28.84 (CH<sub>2</sub>), 26.65 (CH<sub>2</sub>), 22.70 (CH<sub>2</sub>), 21.41 (CH<sub>3(Ar)</sub>), 14.19 (CH<sub>3</sub>). HRMS (ESI)  $m/z$ : [M + H]<sup>+</sup> Calcd for C<sub>16</sub>H<sub>23</sub>O<sub>2</sub> 247.1693; Found 247.1625.

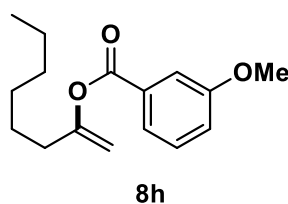

**Compound 8h:** According to the general procedure, the addition of 3-methoxybenzoic acid (38.0 mg, 0.25 mmol) to 1-octyne (22.1 mg, 0.20 mmol) afforded the title product (38.0 mg, 73%) as oil. <sup>1</sup>H NMR (500 MHz, CDCl<sub>3</sub>)  $\delta$  7.68 (d,  $J$  = 7.7 Hz, 1H), 7.63 – 7.55 (m, 1H), 7.37 (t,  $J$  = 8.0 Hz, 1H), 7.18 – 7.08 (m, 1H), 4.85 (d,  $J$  = 1.1 Hz, 1H), 4.83 (d,  $J$  = 0.8 Hz, 1H), 3.86 (s, 3H), 2.33 (t,  $J$  = 7.6 Hz, 2H), 1.53 (dt,  $J$  = 15.3, 7.5 Hz, 2H), 1.39 – 1.25 (m, 6H), 0.88 (t,  $J$  = 6.9 Hz, 3H). <sup>13</sup>C NMR (126 MHz, CDCl<sub>3</sub>)  $\delta$  164.79 (CO), 159.76 (=C(O)-), 157.00 (C<sub>Ar</sub>), 131.36 (C<sub>Ar</sub>), 129.61 (C<sub>Ar</sub>), 122.47 (C<sub>Ar</sub>), 119.97 (C<sub>Ar</sub>), 114.42 (C<sub>Ar</sub>), 101.45 (=CH<sub>2</sub>), 55.61 (OCH<sub>3</sub>), 33.55 (CH<sub>2</sub>), 31.72 (CH<sub>2</sub>), 28.83 (CH<sub>2</sub>), 26.64 (CH<sub>2</sub>), 22.70 (CH<sub>2</sub>), 14.19 (CH<sub>3</sub>).

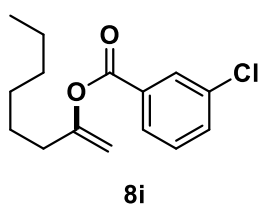

**Compound 8i:** According to the general procedure, the addition of 3-chlorobenzoic acid (39.1 mg, 0.25 mmol) to 1-octyne (22.1 mg, 0.20 mmol) afforded the title product (41.0 mg, 77%) as oil. <sup>1</sup>H NMR (500 MHz, CDCl<sub>3</sub>)  $\delta$  8.06 (t,  $J$  = 1.8 Hz, 1H), 7.97 (d,  $J$  = 7.8 Hz, 1H), 7.56 (ddd,  $J$  = 7.9, 2.0, 0.9 Hz, 1H), 7.41 (t,  $J$  = 7.9 Hz, 1H), 4.86 (d,  $J$  = 1.4 Hz, 1H), 4.84 (s, 1H), 2.33 (t,  $J$  = 7.6 Hz, 2H), 1.55 – 1.49 (m, 2H), 1.39 – 1.24 (m, 7H), 0.88 (t,  $J$  = 6.9 Hz, 3H). <sup>13</sup>C NMR (126 MHz, CDCl<sub>3</sub>)  $\delta$  163.70 (CO), 156.84 (=C(O)-), 134.78 (C<sub>Ar</sub>), 133.43 (C<sub>Ar</sub>), 131.82 (C<sub>Ar</sub>), 130.10 (C<sub>Ar</sub>), 129.92 (C<sub>Ar</sub>), 128.18 (C<sub>Ar</sub>), 101.66 (=CH<sub>2</sub>), 33.48 (CH<sub>2</sub>), 31.70 (CH<sub>2</sub>), 28.80 (CH<sub>2</sub>), 26.62 (CH<sub>2</sub>), 22.69 (CH<sub>2</sub>), 14.18 (CH<sub>3</sub>). HRMS (ESI)  $m/z$ : [M + H]<sup>+</sup> Calcd for C<sub>15</sub>H<sub>20</sub>ClO<sub>2</sub> 267.1146; Found 267.1102.

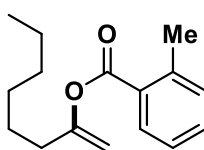**8j**

**Compound 8j:** According to the general procedure, the addition of 2-methylbenzoic acid (34.0 mg, 0.25 mmol) to 1-octyne (22.1 mg, 0.20 mmol) afforded the title product (41.0 mg, 83%) as oil. <sup>1</sup>H NMR (500 MHz, CDCl<sub>3</sub>)  $\delta$  7.99 (dd,  $J$  = 8.0, 1.0 Hz, 1H), 7.43 (td,  $J$  = 7.5, 1.2 Hz, 1H), 7.28 (dd,  $J$  = 7.4, 3.8 Hz, 2H), 4.83 (d,  $J$  = 3.5 Hz, 2H), 2.63 (s, 3H), 2.34 (t,  $J$  = 7.6 Hz, 2H), 1.54 (dt,  $J$  = 15.3, 7.4 Hz, 2H), 1.37 (dt,  $J$  = 14.5, 7.1 Hz, 2H), 1.33 – 1.26 (m, 4H), 0.89 (t,  $J$  = 6.9 Hz, 3H). <sup>13</sup>C NMR (126 MHz, CDCl<sub>3</sub>)  $\delta$  165.68 (CO), 157.00 (=C(O)-), 140.99 (C<sub>Ar</sub>), 132.49 (C<sub>Ar</sub>), 131.97 (C<sub>Ar</sub>), 131.05 (C<sub>Ar</sub>), 129.19 (C<sub>Ar</sub>), 125.93 (C<sub>Ar</sub>), 101.41 (CH<sub>2</sub>), 33.62 (CH<sub>2</sub>), 31.74 (CH<sub>2</sub>), 28.84 (CH<sub>2</sub>), 26.67 (CH<sub>2</sub>), 22.70 (CH<sub>2</sub>), 21.97 (CH<sub>3</sub>), 14.19 (CH<sub>3</sub>). HRMS (ESI)  $m/z$ : [M + H]<sup>+</sup> Calcd for C<sub>16</sub>H<sub>23</sub>O<sub>2</sub> 247.1693; Found 247.1649.

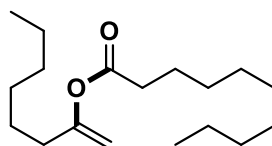**8k**

**Compound 8k:** According to the general procedure, the addition of decanoic acid (43.1 mg, 0.25 mmol) to 1-octyne (22.1 mg, 0.20 mmol) afforded the title product (50.0 mg, 88%) as oil. <sup>1</sup>H NMR (500 MHz, CDCl<sub>3</sub>)  $\delta$  4.70 (d,  $J$  = 1.0 Hz, 1H), 4.68 (d,  $J$  = 1.0 Hz, 1H), 2.37 (t,  $J$  = 7.5 Hz, 2H), 2.19 (t,  $J$  = 7.6 Hz, 2H), 1.69 – 1.62 (m, 2H), 1.49 – 1.40 (m, 2H), 1.34 – 1.24 (m, 18H), 0.90 – 0.85 (m, 6H). <sup>13</sup>C NMR (126 MHz, CDCl<sub>3</sub>)  $\delta$  172.14 (CO), 156.80 (=C(O)-),

101.01 (=CH<sub>2</sub>), 34.57 (CH<sub>2</sub>), 33.51 (CH<sub>2</sub>), 32.00 (CH<sub>2</sub>), 31.73 (CH<sub>2</sub>), 29.56 (CH<sub>2</sub>), 29.39 (CH<sub>2</sub>), 29.23 (CH<sub>2</sub>), 28.81 (CH<sub>2</sub>), 26.57 (CH<sub>2</sub>), 25.12 (CH<sub>2</sub>), 22.80 (CH<sub>2</sub>), 22.69 (CH<sub>2</sub>), 14.22 (CH<sub>3</sub>), 14.18 (CH<sub>3</sub>). HRMS (ESI) m/z: [M + H]<sup>+</sup> Calcd for C<sub>18</sub>H<sub>35</sub>O<sub>2</sub> 283.2632; Found 283.2593.

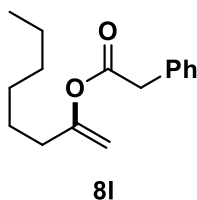

**Compound 8l:** According to the general procedure, the addition of phenylacetic acid (34.0 mg, 0.25 mmol) to 1-octyne (22.1 mg, 0.20 mmol) afforded the title product (42.0 mg, 85%) as oil. <sup>1</sup>H NMR (500 MHz, CDCl<sub>3</sub>)  $\delta$  7.44 – 7.19 (m, 5H), 4.71 (s, 2H), 3.70 (s, 2H), 2.23 – 2.13 (m, 2H), 1.41 – 1.32 (m, 2H), 1.31 – 1.18 (m, 6H), 0.88 (t,  $J$  = 7.0 Hz, 3H). <sup>13</sup>C NMR (126 MHz, CDCl<sub>3</sub>)  $\delta$  169.81 (CO), 156.77 (=C(O)-), 133.84 (C<sub>Ar</sub>), 129.37 (C<sub>Ar</sub>), 128.76 (C<sub>Ar</sub>), 127.34 (C<sub>Ar</sub>), 101.23 (=CH<sub>2</sub>), 41.65 (CH<sub>2</sub>), 33.33 (CH<sub>2</sub>), 31.67 (CH<sub>2</sub>), 28.70 (CH<sub>2</sub>), 26.40 (CH<sub>2</sub>), 22.64 (CH<sub>2</sub>), 14.18 (CH<sub>3</sub>). HRMS (ESI) m/z: [M + H]<sup>+</sup> Calcd for C<sub>16</sub>H<sub>23</sub>O<sub>2</sub> 247.1693; Found 247.1654.

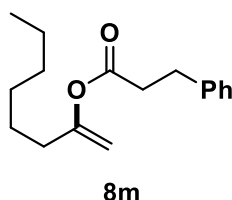

**Compound 8m:** According to the general procedure, the addition of 3-phenylpropanoic acid (37.5 mg, 0.25 mmol) to 1-octyne (22.1 mg, 0.20 mmol) afforded the title product (46.0 mg, 88%) as oil. <sup>1</sup>H NMR (500 MHz, CDCl<sub>3</sub>)  $\delta$  7.37 – 7.26 (m, 2H), 7.26 – 7.14 (m, 3H), 4.70 (d,  $J$  = 1.0 Hz, 1H), 4.66 (d,  $J$  = 1.1 Hz, 1H), 3.00 (t,  $J$  = 7.8 Hz, 2H), 2.72 (t,  $J$  = 7.8 Hz, 2H), 2.15 (t,  $J$  = 7.6 Hz, 2H), 1.44 – 1.36 (m, 2H), 1.33 – 1.23 (m, 6H), 0.89 (t,  $J$  = 7.0 Hz, 3H). <sup>13</sup>C NMR (126 MHz, CDCl<sub>3</sub>)  $\delta$  171.19 (CO), 156.75 (=C(O)-), 140.35 (C<sub>Ar</sub>), 128.65 (C<sub>Ar</sub>), 128.46 (C<sub>Ar</sub>), 126.48 (C<sub>Ar</sub>), 101.13 (=CH<sub>2</sub>), 36.08 (CH<sub>2</sub>), 33.45 (CH<sub>2</sub>), 31.69 (CH<sub>2</sub>), 31.09 (CH<sub>2</sub>), 28.77 (CH<sub>2</sub>), 26.50 (CH<sub>2</sub>), 22.68 (CH<sub>3</sub>), 14.19 (CH<sub>3</sub>). HRMS (ESI) m/z: [M + H]<sup>+</sup> Calcd for C<sub>17</sub>H<sub>25</sub>O<sub>2</sub> 261.1849; Found 261.1809.

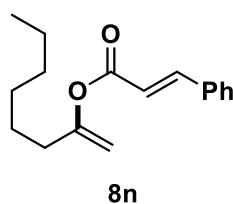

**Compound 8n:** According to the general procedure, the addition of cinnamic acid (37.0 mg, 0.25 mmol) to 1-octyne (22.1 mg, 0.20 mmol) afforded the title product (41.0 mg, 80%) as oil. <sup>1</sup>H NMR (500 MHz, CDCl<sub>3</sub>)  $\delta$  7.75 (d,  $J$  = 16.0 Hz, 1H), 7.60 – 7.50 (m, 2H), 7.47 – 7.31 (m, 3H), 6.49 (d,  $J$  = 16.0 Hz, 1H), 4.81 (d,  $J$  = 1.2 Hz, 1H), 4.78 (d,  $J$  = 1.0 Hz, 1H), 2.29 (t,  $J$  = 7.6 Hz, 2H), 1.56 – 1.44 (m, 2H), 1.39 – 1.26 (m, 6H), 0.89 (t,  $J$  = 6.9 Hz, 3H). <sup>13</sup>C NMR (126 MHz, CDCl<sub>3</sub>)  $\delta$  165.20 (CO), 156.82 (=C(O)-), 145.97 (=CH<sub>CO</sub>), 134.38 (C<sub>Ar</sub>), 130.64 (C<sub>Ar</sub>), 129.07 (C<sub>Ar</sub>), 128.32 (C<sub>Ar</sub>), 117.80 (=CH<sub>Ar</sub>), 101.22 (=CH<sub>2</sub>), 33.57 (CH<sub>2</sub>), 31.72 (CH<sub>2</sub>), 28.82 (CH<sub>2</sub>), 26.60 (CH<sub>2</sub>), 22.69 (CH<sub>2</sub>), 14.19 (CH<sub>3</sub>).

#### H. Characterization Data of Derivatization of Pharmaceuticals Products:

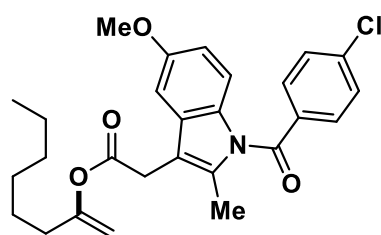

**8o:** from *Indomethacin*

**Compound 8o:** According to the general procedure, the addition of *Indomethacin* (35.8 mg, 0.10 mmol) to 1-octyne (22.1 mg, 0.20 mmol) afforded the title product (38.0 mg, 81%) as oil. <sup>1</sup>H NMR (500 MHz, CDCl<sub>3</sub>)  $\delta$  7.74 – 7.57 (m, 2H), 7.54 – 7.38 (m, 2H), 6.99 (d,  $J$  = 2.5 Hz, 1H), 6.88 (d,  $J$  = 9.0 Hz, 1H), 6.68 (dd,  $J$  = 9.0, 2.5 Hz, 1H), 4.71 (s, 2H), 3.83 (s, 3H), 3.74 (s, 2H), 2.41 (s, 3H), 2.16 (t,  $J$  = 7.5 Hz, 2H), 1.38 – 1.30 (m, 2H), 1.28 – 1.14 (m, 6H), 0.85 (t,  $J$  = 7.1 Hz, 3H). <sup>13</sup>C NMR (126 MHz, CDCl<sub>3</sub>)  $\delta$  169.07 (CO), 168.38 (CO), 156.67 (=C(O)-), 156.20 (C<sub>Ar</sub>), 139.41 (C<sub>Ar</sub>), 136.12 (C<sub>Ar</sub>), 134.00 (C<sub>Ar</sub>), 131.29 (C<sub>Ar</sub>), 130.92 (C<sub>Ar</sub>), 130.63 (C<sub>Ar</sub>), 129.24 (C<sub>Ar</sub>), 115.08 (C<sub>Ar</sub>), 112.41 (C<sub>Ar</sub>), 111.90 (C<sub>Ar</sub>), 101.31 (C<sub>Ar</sub>), 101.28 (=CH<sub>2</sub>), 55.78 (OCH<sub>3</sub>), 33.39(CH<sub>2</sub>), 31.64 (CH<sub>2</sub>), 30.66 (CH<sub>2</sub>), 28.70 (CH<sub>2</sub>), 26.42 (CH<sub>2</sub>), 22.62 (CH<sub>2</sub>), 14.16 (CH<sub>3</sub>), 13.48 (CH<sub>3</sub>). HRMS (ESI)  $m/z$ : [M + H]<sup>+</sup> Calcd for C<sub>27</sub>H<sub>31</sub>ClO<sub>4</sub>N 468.1936; Found 468.1931.

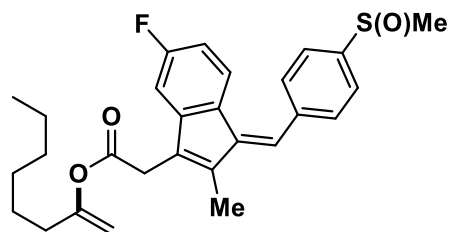**8p:** from *Sulindac*

**Compound 8p:** According to the general procedure, the addition of *Sulindac* (35.6 mg, 0.10 mmol) to 1-octyne (22.1 mg, 0.20 mmol) afforded the title product (35.0 mg, 75%) as oil. <sup>1</sup>H NMR (500 MHz, CDCl<sub>3</sub>)  $\delta$  7.45 (d,  $J$  = 8.2 Hz, 2H), 7.37 (dd,  $J$  = 8.4, 5.2 Hz, 1H), 7.29 (d,  $J$  = 8.3 Hz, 2H), 7.15 (s, 1H), 6.92 (dd,  $J$  = 9.0, 2.4 Hz, 1H), 6.59 (td,  $J$  = 9.0, 2.4 Hz, 1H), 4.71 (d,  $J$  = 4.8 Hz, 2H), 3.63 (s, 2H), 2.55 (s, 3H), 2.23 (s, 3H), 2.16 (t,  $J$  = 7.5 Hz, 2H), 1.35 (dd,  $J$  = 14.6, 7.2 Hz, 2H), 1.27 – 1.17 (m, 6H), 0.85 (t,  $J$  = 7.1 Hz, 3H). <sup>13</sup>C NMR (126 MHz, CDCl<sub>3</sub>)  $\delta$  168.63 (CO), 163.26 (d,  $J$  = 245.7 Hz), 156.73 (=C(O)–), 146.48 (d,  $J$  = 8.7 Hz) (C<sub>Ar</sub>), 140.22 (CH), 139.31 (C<sub>Ar</sub>), 138.76 (C<sub>Ar</sub>), 133.08 (C<sub>Ar</sub>), 130.59 (d,  $J$  = 2.5 Hz) (C<sub>Ar</sub>), 130.11 (d,  $J$  = 1.4 Hz) (C<sub>Ar</sub>), 130.05 (C<sub>Ar</sub>), 129.91 (d,  $J$  = 2.7 Hz) (C<sub>Ar</sub>), 126.07 (C<sub>Ar</sub>), 123.83 (d,  $J$  = 8.9 Hz) (C<sub>Ar</sub>), 110.73 (d,  $J$  = 22.6 Hz) (C<sub>Ar</sub>), 105.88 (d,  $J$  = 23.8 Hz) (C<sub>Ar</sub>), 101.34 (=CH<sub>2</sub>), 33.41 (CH<sub>2</sub>), 32.15 (CH<sub>2</sub>), 31.68 (CH<sub>2</sub>), 28.73 (CH<sub>2</sub>), 26.46 (CH<sub>2</sub>), 22.64 (CH<sub>2</sub>), 15.56 (CH<sub>3</sub>), 14.19 (CH<sub>3</sub>), 10.76 (CH<sub>3</sub>). <sup>19</sup>F NMR (471 MHz, CDCl<sub>3</sub>)  $\delta$  -113.80 (s). HRMS (ESI)  $m/z$ : [M + H]<sup>+</sup> Calcd for C<sub>28</sub>H<sub>32</sub>FO<sub>3</sub>S 467.2051; Found 467.2043.

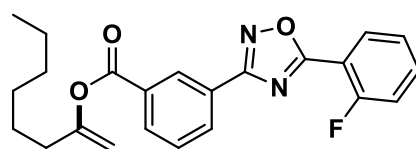**8q:** from *PTC-124*

**Compound 8q:** According to the general procedure, the addition of *PTC-124* (28.4 mg, 0.10 mmol) to 1-octyne (22.1 mg, 0.20 mmol) afforded the title product (25.0 mg, 63%) as oil. <sup>1</sup>H NMR (500 MHz, CDCl<sub>3</sub>)  $\delta$  8.89 (t,  $J$  = 1.5 Hz, 1H), 8.47 – 8.36 (m, 1H), 8.30 – 8.19 (m, 2H), 7.66 – 7.60 (m, 2H), 7.36 (td,  $J$  = 7.8, 0.9 Hz, 1H), 7.33 – 7.28 (m, 1H), 4.90 (d,  $J$  = 1.4 Hz, 1H), 4.87 (d,  $J$  = 1.0 Hz, 1H), 2.37 (t,  $J$  = 7.6 Hz, 2H), 1.57 (dd,  $J$  = 15.2, 7.3 Hz, 2H), 1.38 (dt,  $J$  = 14.1, 6.9 Hz, 2H), 1.33 – 1.28 (m, 4H), 0.88 (t,  $J$  = 6.9 Hz, 3H). <sup>13</sup>C NMR (126 MHz, CDCl<sub>3</sub>)  $\delta$  173.26 (d,  $J$  = 4.3 Hz) (C<sub>Ar</sub>), 168.17 (CO), 164.23 (=C(O)–), 160.97 (d,  $J$  = 260.9 Hz) (C<sub>Ar</sub>), 156.97 (C<sub>Ar</sub>), 134.92 (d,  $J$  = 8.6 Hz) (C<sub>Ar</sub>), 132.70 (C<sub>Ar</sub>), 132.25 (C<sub>Ar</sub>), 131.14 (C<sub>Ar</sub>), 130.98 (C<sub>Ar</sub>), 129.24 (d,  $J$  = 18.6 Hz) (C<sub>Ar</sub>), 127.51 (C<sub>Ar</sub>), 124.90 (d,  $J$  = 3.7 Hz) (C<sub>Ar</sub>), 117.35 (d,  $J$  = 20.8 Hz) (C<sub>Ar</sub>), 115.63 (C<sub>Ar</sub>), 112.85 (d,  $J$  = 11.4 Hz) (C<sub>Ar</sub>), 101.66 (=CH<sub>2</sub>), 33.54 (CH<sub>2</sub>),

31.73 (CH<sub>2</sub>), 28.85 (CH<sub>2</sub>), 26.65 (CH<sub>2</sub>), 22.71 (CH<sub>2</sub>), 14.20 (CH<sub>3</sub>). <sup>19</sup>F NMR (471 MHz, CDCl<sub>3</sub>)  $\delta$  -108.14 (s). HRMS (ESI)  $m/z$ : [M + H]<sup>+</sup> Calcd for C<sub>23</sub>H<sub>24</sub>FO<sub>3</sub>N<sub>2</sub> 395.1765; Found 395.1752.

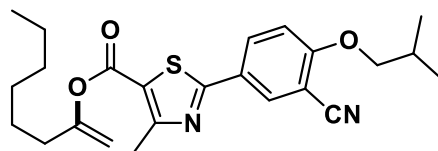

**8r**: from *Febuxostat*

**Compound 8r**: According to the general procedure, the addition of *Febuxostat* (31.6 mg, 0.10 mmol) to 1-octyne (22.1 mg, 0.20 mmol) afforded the title product (35.0 mg, 82%) as oil. <sup>1</sup>H NMR (500 MHz, CDCl<sub>3</sub>)  $\delta$  8.19 (d,  $J$  = 2.2 Hz, 1H), 8.10 (dd,  $J$  = 8.8, 2.3 Hz, 1H), 7.02 (d,  $J$  = 8.9 Hz, 1H), 4.95 – 4.74 (m, 2H), 3.90 (d,  $J$  = 6.5 Hz, 2H), 2.78 (s, 3H), 2.31 (t,  $J$  = 7.6 Hz, 2H), 2.21 (tt,  $J$  = 13.3, 6.7 Hz, 1H), 1.52 (dt,  $J$  = 15.2, 7.4 Hz, 2H), 1.38 – 1.27 (m, 6H), 1.09 (d,  $J$  = 6.7 Hz, 6H), 0.89 (t,  $J$  = 6.8 Hz, 3H). <sup>13</sup>C NMR (126 MHz, CDCl<sub>3</sub>)  $\delta$  167.86 (CO), 162.74 (C<sub>Ar</sub>), 162.43 (C<sub>Ar</sub>), 160.18 (=C(O)-), 156.37 (C<sub>Ar</sub>), 132.74 (C<sub>Ar</sub>), 132.31 (C<sub>Ar</sub>), 126.07 (C<sub>Ar</sub>), 121.28 (C<sub>Ar</sub>), 115.50 (C<sub>Ar</sub>), 112.78 (C<sub>Ar</sub>), 103.19 (CN), 101.90 (=CH<sub>2</sub>), 75.86 (OCH<sub>2</sub>), 33.58 (CH), 31.71 (CH<sub>2</sub>), 28.77 (CH<sub>2</sub>), 28.30 (CH<sub>2</sub>), 26.60 (CH<sub>2</sub>), 22.70 (CH<sub>2</sub>), 19.19 (CH<sub>3</sub>), 17.70 (CH<sub>3</sub>), 14.20 (CH<sub>3</sub>). [M + H]<sup>+</sup> Calcd for C<sub>24</sub>H<sub>31</sub>SO<sub>3</sub>N<sub>2</sub> 427.2050; Found 427.2040.

### I. Characterization Data of Hydroamination Products:

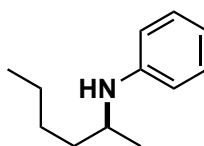

**10a**

**Compound 10a**: According to the general procedure, the addition of aniline (55.9 mg, 0.60 mmol) to 1-hexyne (41.1 mg, 0.50 mmol) afforded the title product (81.0 mg, 91%) as oil. <sup>1</sup>H NMR (500 MHz, CDCl<sub>3</sub>)  $\delta$  7.19 (dd,  $J$  = 8.3, 7.5 Hz, 2H), 6.69 (t,  $J$  = 7.3 Hz, 1H), 6.61 (d,  $J$  = 7.7 Hz, 2H), 3.49 (td,  $J$  = 12.5, 6.3 Hz, 2H), 1.65 – 1.57 (m, 1H), 1.50 – 1.34 (m, 5H), 1.21 (d,  $J$  = 6.3 Hz, 3H), 0.95 (t,  $J$  = 7.0 Hz, 3H). <sup>13</sup>C NMR (126 MHz, CDCl<sub>3</sub>)  $\delta$  147.84 (C<sub>Ar</sub>), 129.38 (C<sub>Ar</sub>), 116.84 (C<sub>Ar</sub>), 113.17 (C<sub>Ar</sub>), 48.54 (HCN), 37.06 (CH<sub>2</sub>), 28.49 (CH<sub>2</sub>), 22.89 (CH<sub>2</sub>), 20.91 (CH<sub>3</sub>), 14.22 (CH<sub>3</sub>).

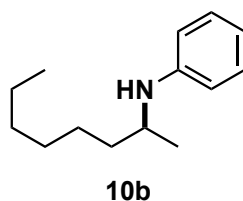

**Compound 10b:** According to the general procedure, the addition of aniline (55.9 mg, 0.60 mmol) to 1-octyne (55.1 mg, 0.50 mmol) afforded the title product (84.0 mg, 82%) as oil. <sup>1</sup>H NMR (500 MHz, CDCl<sub>3</sub>)  $\delta$  7.19 (dd,  $J$  = 8.4, 7.4 Hz, 2H), 6.69 (t,  $J$  = 7.3 Hz, 1H), 6.60 (d,  $J$  = 7.7 Hz, 2H), 3.52 – 3.39 (m, 2H), 1.64 – 1.56 (m, 1H), 1.49 – 1.38 (m, 3H), 1.37 – 1.29 (m, 6H), 1.20 (d,  $J$  = 6.2 Hz, 3H), 0.92 (t,  $J$  = 6.9 Hz, 3H). <sup>13</sup>C NMR (126 MHz, CDCl<sub>3</sub>)  $\delta$  147.86 (C<sub>Ar</sub>), 129.38 (C<sub>Ar</sub>), 116.84 (C<sub>Ar</sub>), 113.18 (C<sub>Ar</sub>), 48.58 (HCN), 37.38 (CH<sub>2</sub>), 31.98 (CH<sub>2</sub>), 29.50 (CH<sub>2</sub>), 26.26 (CH<sub>2</sub>), 22.76 (CH<sub>2</sub>), 20.91 (CH<sub>3</sub>), 14.22 (CH<sub>3</sub>).

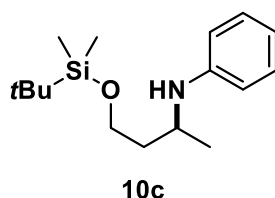

**Compound 10c:** According to the general procedure, the addition of aniline (55.9 mg, 0.60 mmol) to 1-OTBS-butyne (92.2 mg, 0.50 mmol) afforded the title product (105.0 mg, 75%) as oil. <sup>1</sup>H NMR (500 MHz, CDCl<sub>3</sub>)  $\delta$  7.19 (dd,  $J$  = 8.3, 7.5 Hz, 2H), 6.69 (t,  $J$  = 7.3 Hz, 1H), 6.63 (d,  $J$  = 7.8 Hz, 2H), 3.83 (ddd,  $J$  = 12.0, 7.0, 5.2 Hz, 2H), 3.78 – 3.67 (m, 2H), 1.82 (ddd,  $J$  = 18.5, 11.7, 6.4 Hz, 1H), 1.77 – 1.66 (m, 1H), 1.24 (d,  $J$  = 6.3 Hz, 3H), 0.96 (s, 9H), 0.10 (s, 6H). <sup>13</sup>C NMR (126 MHz, CDCl<sub>3</sub>)  $\delta$  147.87 (C<sub>Ar</sub>), 129.33 (C<sub>Ar</sub>), 116.84 (C<sub>Ar</sub>), 113.24 (C<sub>Ar</sub>), 60.62 (HCN), 46.32 (CH<sub>2</sub>), 39.74 (CH<sub>2</sub>), 26.08 (CH<sub>3</sub>(*t*Bu)), 20.76 (CH<sub>3</sub>), 18.38 (SiC<sub>q</sub>), -5.28 (d,  $J$  = 1.7 Hz) (SiCH<sub>3</sub>).

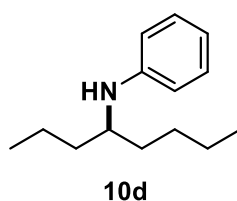

**Compound 10d:** According to the general procedure, the addition of aniline (55.9 mg, 0.60 mmol) to 4-octyne (55.1 mg, 0.50 mmol) afforded the title product (85.0 mg, 83%) as oil. <sup>1</sup>H NMR (500 MHz, CDCl<sub>3</sub>)  $\delta$  7.16 (dd,  $J$  = 8.4, 7.4 Hz, 2H), 6.65 (t,  $J$  = 7.3 Hz, 1H), 6.57 (d,  $J$  = 7.7 Hz, 2H), 3.39 (s, 1H), 3.38 – 3.32 (m, 1H), 1.57 – 1.30 (m, 10H), 0.92 (dt,  $J$  = 11.0, 7.2 Hz,

6H). <sup>13</sup>C NMR (126 MHz, CDCl<sub>3</sub>)  $\delta$  148.36 (C<sub>Ar</sub>), 129.39 (C<sub>Ar</sub>), 116.56 (C<sub>Ar</sub>), 112.92 (C<sub>Ar</sub>), 52.70 (HCN), 37.41 (CH<sub>2</sub>), 34.82 (CH<sub>2</sub>), 28.26 (CH<sub>2</sub>), 23.01 (CH<sub>2</sub>), 19.27 (CH<sub>2</sub>), 14.37 (CH<sub>3</sub>), 14.24 (CH<sub>3</sub>).

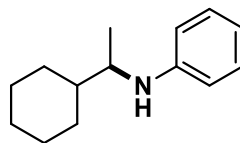**10e**

**Compound 10e:** According to the general procedure, the addition of aniline (55.9 mg, 0.60 mmol) to cyclohexylacetylene (54.1 mg, 0.50 mmol) afforded the title product (81.0 mg, 80%) as oil. <sup>1</sup>H NMR (500 MHz, CDCl<sub>3</sub>)  $\delta$  7.17 (dd,  $J = 8.4, 7.4$  Hz, 2H), 6.66 (t,  $J = 7.3$  Hz, 1H), 6.58 (d,  $J = 7.7$  Hz, 2H), 3.49 (s, 1H), 3.39 – 3.29 (m, 1H), 1.87 – 1.66 (m, 5H), 1.51 – 1.42 (m, 1H), 1.29 – 1.03 (m, 8H). <sup>13</sup>C NMR (126 MHz, CDCl<sub>3</sub>)  $\delta$  148.09 (C<sub>Ar</sub>), 129.39 (C<sub>Ar</sub>), 116.63 (C<sub>Ar</sub>), 113.07 (C<sub>Ar</sub>), 53.10 (HCN), 43.10 (CH<sub>(Cy)</sub>), 29.92 (CH<sub>2</sub>), 28.54 (CH<sub>2</sub>), 26.78 (CH<sub>2</sub>), 26.63 (CH<sub>2</sub>), 26.48 (CH<sub>2</sub>), 17.55 (CH<sub>3</sub>).

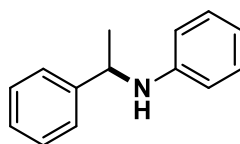**10f**

**Compound 10f:** According to the general procedure, the addition of aniline (55.9 mg, 0.60 mmol) to phenylacetylene (51.1 mg, 0.50 mmol) afforded the title product (91.0 mg, 92%) as oil. <sup>1</sup>H NMR (500 MHz, CDCl<sub>3</sub>)  $\delta$  7.45 (d,  $J = 7.3$  Hz, 2H), 7.39 (t,  $J = 7.6$  Hz, 2H), 7.30 (t,  $J = 7.2$  Hz, 1H), 7.17 (dd,  $J = 8.5, 7.4$  Hz, 2H), 6.73 (t,  $J = 7.3$  Hz, 1H), 6.59 (d,  $J = 7.7$  Hz, 2H), 4.56 (q,  $J = 6.7$  Hz, 1H), 4.09 (s, 1H), 1.58 (d,  $J = 6.7$  Hz, 3H). <sup>13</sup>C NMR (126 MHz, CDCl<sub>3</sub>)  $\delta$  147.38 (C<sub>Ar</sub>), 145.33 (C<sub>Ar</sub>), 129.20 (C<sub>Ar</sub>), 128.73 (C<sub>Ar</sub>), 126.96 (C<sub>Ar</sub>), 125.94 (C<sub>Ar</sub>), 117.33 (C<sub>Ar</sub>), 113.39 (C<sub>Ar</sub>), 53.54 (HCN), 25.11 (CH<sub>3</sub>).

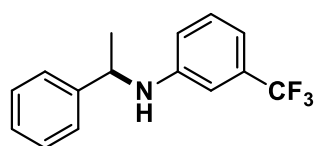**10g**

**Compound 10g:** According to the general procedure, the addition of 3-trifluoromethyl aniline (96.7 mg, 0.60 mmol) to phenylacetylene (51.1 mg, 0.50 mmol) in presence of 0.05 mol% of



catalyst loading afforded the title product (118.0 mg, 89%) as oil. <sup>1</sup>H NMR (500 MHz, CDCl<sub>3</sub>)  $\delta$  7.45 – 7.28 (m, 4H), 7.27 – 7.22 (m, 1H), 7.15 (t,  $J$  = 7.9 Hz, 1H), 6.87 (d,  $J$  = 7.6 Hz, 1H), 6.76 (s, 1H), 6.61 (dd,  $J$  = 8.2, 2.0 Hz, 1H), 4.51 (q,  $J$  = 6.6 Hz, 1H), 4.23 (s, 1H), 1.54 (d,  $J$  = 6.7 Hz, 3H). <sup>13</sup>C NMR (126 MHz, CDCl<sub>3</sub>)  $\delta$  147.47 (C<sub>Ar</sub>), 144.47 (C<sub>Ar</sub>), 131.47 (q,  $J$  = 31.7 Hz) (C<sub>Ar</sub>), 129.67 (C<sub>Ar</sub>), 128.92 (C<sub>Ar</sub>), 127.30 (C<sub>Ar</sub>), 125.89 (C<sub>Ar</sub>), 124.43 (q,  $J$  = 272.3 Hz) (CF<sub>3</sub>), 116.05 (C<sub>Ar</sub>), 113.75 (q,  $J$  = 3.9 Hz) (C<sub>Ar</sub>), 109.91 (q,  $J$  = 3.9 Hz) (C<sub>Ar</sub>), 53.54 (HCN), 24.93 (CH<sub>3</sub>). <sup>19</sup>F NMR (471 MHz, CDCl<sub>3</sub>)  $\delta$  -62.88 (s).

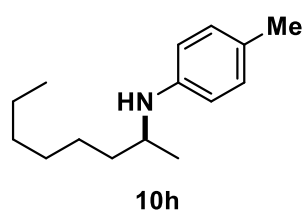

**Compound 10h:** According to the general procedure, the addition of *p*-toluidine (64.3 mg, 0.60 mmol) to 1-octyne (55.1 mg, 0.50 mmol) afforded the title product (93.0 mg, 85%) as oil. <sup>1</sup>H NMR (500 MHz, CDCl<sub>3</sub>)  $\delta$  6.99 (d,  $J$  = 8.2 Hz, 2H), 6.52 (d,  $J$  = 8.4 Hz, 2H), 3.49 – 3.39 (m, 1H), 3.30 (s, 1H), 2.25 (s, 3H), 1.62 – 1.53 (m, 1H), 1.45 – 1.26 (m, 9H), 1.17 (d,  $J$  = 6.3 Hz, 3H), 0.91 (t,  $J$  = 6.9 Hz, 3H). <sup>13</sup>C NMR (126 MHz, CDCl<sub>3</sub>)  $\delta$  145.60 (C<sub>Ar</sub>), 129.88 (C<sub>Ar</sub>), 126.08 (C<sub>Ar</sub>), 113.47 (C<sub>Ar</sub>), 48.92 (HCN), 37.40 (CH<sub>2</sub>), 31.99 (CH<sub>2</sub>), 29.52 (CH<sub>2</sub>), 26.28 (CH<sub>2</sub>), 22.77 (CH<sub>2</sub>), 20.94 (CH<sub>3</sub>), 20.47 (CH<sub>3</sub>), 14.22 (CH<sub>3</sub>).

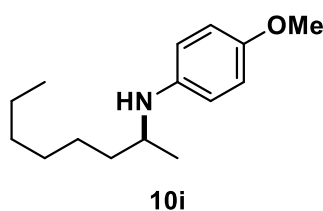

**Compound 10i:** According to the general procedure, the addition of *p*-anisidine (73.9 mg, 0.60 mmol) to 1-octyne (55.1 mg, 0.50 mmol) afforded the title product (90.0 mg, 76%) as oil. <sup>1</sup>H NMR (500 MHz, CDCl<sub>3</sub>)  $\delta$  6.92 – 6.65 (m, 2H), 6.64 – 6.51 (m, 2H), 3.75 (s, 3H), 3.42 – 3.32 (m, 1H), 3.15 (s, 1H), 1.62 – 1.52 (m, 1H), 1.45 – 1.35 (m, 3H), 1.34 – 1.25 (m, 6H), 1.16 (d,  $J$  = 6.3 Hz, 3H), 0.90 (t,  $J$  = 6.9 Hz, 3H). <sup>13</sup>C NMR (126 MHz, CDCl<sub>3</sub>)  $\delta$  151.90 (C<sub>Ar</sub>), 142.12 (C<sub>Ar</sub>), 115.07 (C<sub>Ar</sub>), 114.78 (C<sub>Ar</sub>), 55.94 (OCH<sub>3</sub>), 49.63 (HCN), 37.40 (CH<sub>2</sub>), 31.98 (CH<sub>2</sub>), 29.52 (CH<sub>2</sub>), 26.27 (CH<sub>2</sub>), 22.75 (CH<sub>2</sub>), 20.93 (CH<sub>3</sub>), 14.21 (CH<sub>3</sub>).

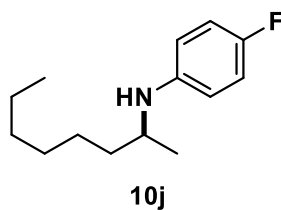

**Compound 10j:** According to the general procedure, the addition of 4-fluoroaniline (66.7 mg, 0.60 mmol) to 1-octyne (55.1 mg, 0.50 mmol) afforded the title product (98.0 mg, 88%) as oil. <sup>1</sup>H NMR (500 MHz, CDCl<sub>3</sub>)  $\delta$  6.98 – 6.75 (m, 2H), 6.58 – 6.44 (m, 2H), 3.41 – 3.34 (m, 1H), 3.28 (s, 1H), 1.59 – 1.52 (m, 1H), 1.44 – 1.27 (m, 9H), 1.16 (d,  $J$  = 6.3 Hz, 3H), 0.89 (t,  $J$  = 6.8 Hz, 3H). <sup>13</sup>C NMR (126 MHz, CDCl<sub>3</sub>)  $\delta$  155.61 (d,  $J$  = 234.3 Hz) (C<sub>Ar</sub>), 144.22 (d,  $J$  = 1.7 Hz) (C<sub>Ar</sub>), 115.77 (d,  $J$  = 22.2 Hz) (C<sub>Ar</sub>), 114.10 (d,  $J$  = 7.3 Hz) (C<sub>Ar</sub>), 49.40 (HCN), 37.31 (CH<sub>2</sub>), 31.97 (CH<sub>2</sub>), 29.50 (CH<sub>2</sub>), 26.24 (CH<sub>2</sub>), 22.76 (CH<sub>2</sub>), 20.83 (CH<sub>3</sub>), 14.22 (CH<sub>3</sub>). <sup>19</sup>F NMR (471 MHz, CDCl<sub>3</sub>)  $\delta$  -128.82 (s).

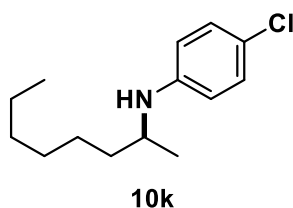

**Compound 10k:** According to the general procedure, the addition of 4-chloroaniline (76.5 mg, 0.60 mmol) to 1-octyne (55.1 mg, 0.50 mmol) afforded the title product (107.0 mg, 89%) as oil. <sup>1</sup>H NMR (500 MHz, CDCl<sub>3</sub>)  $\delta$  7.11 (d,  $J$  = 8.8 Hz, 2H), 6.49 (d,  $J$  = 8.8 Hz, 2H), 3.44 – 3.38 (m, 2H), 1.59 – 1.51 (m, 1H), 1.46 – 1.27 (m, 9H), 1.17 (d,  $J$  = 6.2 Hz, 3H), 0.90 (t,  $J$  = 6.8 Hz, 3H). <sup>13</sup>C NMR (126 MHz, CDCl<sub>3</sub>)  $\delta$  146.41 (C<sub>Ar</sub>), 129.17 (C<sub>Ar</sub>), 121.26 (C<sub>Ar</sub>), 114.21 (C<sub>Ar</sub>), 48.81 (HCN), 37.21 (CH<sub>2</sub>), 31.95 (CH<sub>2</sub>), 29.45 (CH<sub>2</sub>), 26.19 (CH<sub>2</sub>), 22.74 (CH<sub>2</sub>), 20.75 (CH<sub>3</sub>), 14.20 (CH<sub>3</sub>).

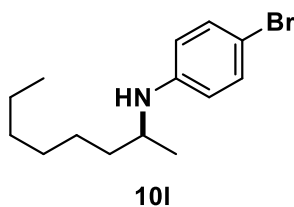

**Compound 10l:** According to the general procedure, the addition of 4-bromoaniline (103.2 mg, 0.60 mmol) to 1-octyne (55.1 mg, 0.50 mmol) afforded the title product (122.0 mg, 86%) as oil. <sup>1</sup>H NMR (500 MHz, CDCl<sub>3</sub>)  $\delta$  7.28 – 7.17 (m, 2H), 6.55 – 6.33 (m, 2H), 3.46 (s, 1H), 3.40 (dq,  $J$  = 12.6, 6.3 Hz, 1H), 1.55 (ddd,  $J$  = 9.8, 9.2, 5.5 Hz, 1H), 1.45 – 1.26 (m, 9H), 1.16

(d,  $J = 6.2$  Hz, 3H), 0.89 (t,  $J = 6.9$  Hz, 3H).  $^{13}\text{C}$  NMR (126 MHz,  $\text{CDCl}_3$ )  $\delta$  146.81 ( $\text{C}_{\text{Ar}}$ ), 132.05 ( $\text{C}_{\text{Ar}}$ ), 114.72 ( $\text{C}_{\text{Ar}}$ ), 108.23 ( $\text{C}_{\text{Ar}}$ ), 48.73 (HCN), 37.19 ( $\text{CH}_2$ ), 31.95 ( $\text{CH}_2$ ), 29.45 ( $\text{CH}_2$ ), 26.19 ( $\text{CH}_2$ ), 22.75 ( $\text{CH}_2$ ), 20.74 ( $\text{CH}_3$ ), 14.21 ( $\text{CH}_3$ ).

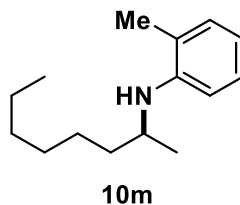

**Compound 10m:** According to the general procedure, the addition of *o*-toluidine (64.3 mg, 0.60 mmol) to 1-octyne (55.1 mg, 0.50 mmol) afforded the title product (98.0 mg, 89%) as oil.  $^1\text{H}$  NMR (500 MHz,  $\text{CDCl}_3$ )  $\delta$  7.15 (t,  $J = 7.7$  Hz, 1H), 7.09 (d,  $J = 7.1$  Hz, 1H), 6.65 (t,  $J = 8.0$  Hz, 2H), 3.62 – 3.49 (m, 1H), 3.33 (s, 1H), 2.16 (s, 3H), 1.66 (tt,  $J = 9.1, 5.0$  Hz, 1H), 1.54 – 1.41 (m, 3H), 1.39 – 1.31 (m, 6H), 1.25 (d,  $J = 6.3$  Hz, 3H), 0.94 (t,  $J = 6.9$  Hz, 3H).  $^{13}\text{C}$  NMR (126 MHz,  $\text{CDCl}_3$ )  $\delta$  145.69 ( $\text{C}_{\text{Ar}}$ ), 130.33 ( $\text{C}_{\text{Ar}}$ ), 127.22 ( $\text{C}_{\text{Ar}}$ ), 121.70 ( $\text{C}_{\text{Ar}}$ ), 116.28 ( $\text{C}_{\text{Ar}}$ ), 110.13 ( $\text{C}_{\text{Ar}}$ ), 48.42 (HCN), 37.46 ( $\text{CH}_2$ ), 31.98 ( $\text{CH}_2$ ), 29.52 ( $\text{CH}_2$ ), 26.29 ( $\text{CH}_2$ ), 22.77 ( $\text{CH}_2$ ), 21.13 ( $\text{CH}_3$ ), 17.71 ( $\text{CH}_3$ ), 14.22 ( $\text{CH}_3$ ).

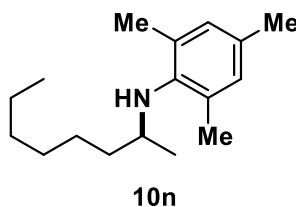

**Compound 10n:** According to the general procedure, the addition of 2,4,6-trimethylaniline (81.1 mg, 0.60 mmol) to 1-octyne (55.1 mg, 0.50 mmol) afforded the title product (97.0 mg, 78%) as oil.  $^1\text{H}$  NMR (500 MHz,  $\text{CDCl}_3$ )  $\delta$  6.83 (s, 2H), 3.29 – 3.15 (m, 1H), 2.70 (s, 1H), 2.26 (s, 9H), 1.62 – 1.55 (m, 1H), 1.46 – 1.37 (m, 3H), 1.37 – 1.29 (m, 6H), 1.07 (d,  $J = 6.4$  Hz, 3H), 0.93 (t,  $J = 6.9$  Hz, 3H).  $^{13}\text{C}$  NMR (126 MHz,  $\text{CDCl}_3$ )  $\delta$  142.69 ( $\text{C}_{\text{Ar}}$ ), 130.41 ( $\text{C}_{\text{Ar}}$ ), 129.57 ( $\text{C}_{\text{Ar}}$ ), 129.22 ( $\text{C}_{\text{Ar}}$ ), 52.79 (HCN), 38.56 ( $\text{CH}_2$ ), 32.02 ( $\text{CH}_2$ ), 29.66 ( $\text{CH}_2$ ), 26.62 ( $\text{CH}_2$ ), 22.77 ( $\text{CH}_2$ ), 21.39 ( $\text{CH}_3$ ), 20.65 ( $\text{CH}_3$ ), 19.07 ( $\text{CH}_3$ ), 14.22 ( $\text{CH}_3$ ).

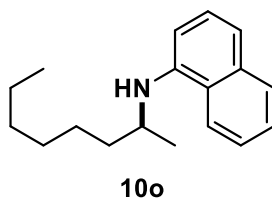

**Compound 10o:** According to the general procedure, the addition of 1-aminonaphthalene (85.9 mg, 0.60 mmol) to 1-octyne (55.1 mg, 0.50 mmol) afforded the title product (95.0 mg, 74%) as oil. <sup>1</sup>H NMR (500 MHz, CDCl<sub>3</sub>)  $\delta$  7.68 (d,  $J$  = 7.8 Hz, 2H), 7.37 – 7.28 (m, 2H), 7.25 (dd,  $J$  = 10.0, 5.8 Hz, 1H), 7.10 (t,  $J$  = 7.0 Hz, 1H), 6.51 (d,  $J$  = 7.6 Hz, 1H), 4.09 (s, 1H), 3.60 – 3.50 (m, 1H), 1.67 – 1.58 (m, 1H), 1.50 – 1.42 (m, 1H), 1.39 – 1.30 (m, 2H), 1.28 – 1.17 (m, 9H), 0.80 (t,  $J$  = 6.8 Hz, 3H). <sup>13</sup>C NMR (126 MHz, CDCl<sub>3</sub>)  $\delta$  142.78 (C<sub>Ar</sub>), 134.67 (C<sub>Ar</sub>), 128.84 (C<sub>Ar</sub>), 126.82 (C<sub>Ar</sub>), 125.69 (C<sub>Ar</sub>), 124.56 (C<sub>Ar</sub>), 123.48 (C<sub>Ar</sub>), 119.89 (C<sub>Ar</sub>), 116.63 (C<sub>Ar</sub>), 104.57 (C<sub>Ar</sub>), 48.64 (HCN), 37.28 (CH<sub>2</sub>), 31.99 (CH<sub>2</sub>), 29.54 (CH<sub>2</sub>), 26.35 (CH<sub>2</sub>), 22.78 (CH<sub>2</sub>), 20.76 (CH<sub>3</sub>), 14.24 (CH<sub>3</sub>).

#### J. Characterization Data of Hydration Products:

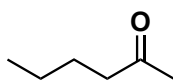

**11a**

**Compound 11a:** According to the general procedure, the hydration of 1-Hexyne (41.1 mg, 0.50 mmol) afforded the title product (48.0 mg, 96%) as oil. <sup>1</sup>H NMR (500 MHz, CDCl<sub>3</sub>)  $\delta$  2.41 (t,  $J$  = 7.5 Hz, 2H), 2.12 (s, 3H), 1.54 (dt,  $J$  = 20.8, 7.5 Hz, 2H), 1.30 (dq,  $J$  = 14.7, 7.4 Hz, 2H), 0.89 (t,  $J$  = 7.3 Hz, 3H). <sup>13</sup>C NMR (126 MHz, CDCl<sub>3</sub>)  $\delta$  209.48 (CO), 43.63 (CH<sub>2</sub>), 29.96 (CH<sub>2</sub>), 26.08 (CH<sub>2</sub>), 22.41 (CH<sub>3</sub>), 13.96 (CH<sub>3</sub>).

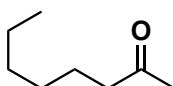

**11b**

**Compound 11b:** According to the general procedure, the hydration of 1-octyne (55.1 mg, 0.50 mmol) afforded the title product (61.0 mg, 95%) as oil. <sup>1</sup>H NMR (500 MHz, CDCl<sub>3</sub>)  $\delta$  2.36 (t,  $J$  = 7.5 Hz, 2H), 2.07 (s, 3H), 1.55 – 1.46 (m, 2H), 1.27 – 1.19 (m, 6H), 0.82 (t,  $J$  = 6.9 Hz, 3H). <sup>13</sup>C NMR (126 MHz, CDCl<sub>3</sub>)  $\delta$  209.28 (CO), 43.81 (CH<sub>2</sub>), 31.63 (CH<sub>2</sub>), 29.82 (CH<sub>2</sub>), 28.88 (CH<sub>2</sub>), 23.86 (CH<sub>2</sub>), 22.52 (CH<sub>3</sub>), 14.03 (CH<sub>3</sub>).

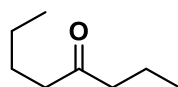**11c**

**Compound 11c:** According to the general procedure, the hydration of 4-octyne (55.1 mg, 0.50 mmol) afforded the title product (60.0 mg, 94%) as oil. <sup>1</sup>H NMR (500 MHz, CDCl<sub>3</sub>)  $\delta$  2.36 (dd,  $J$  = 14.2, 7.0 Hz, 4H), 1.62 – 1.49 (m, 4H), 1.29 (dd,  $J$  = 15.1, 7.5 Hz, 2H), 0.89 (ddd,  $J$  = 11.2, 7.2, 3.6 Hz, 6H). <sup>13</sup>C NMR (126 MHz, CDCl<sub>3</sub>)  $\delta$  211.66 (CO), 44.82 (CH<sub>2</sub>), 42.66 (CH<sub>2</sub>), 26.08 (CH<sub>2</sub>), 22.50 (CH<sub>2</sub>), 17.43 (CH<sub>2</sub>), 13.97 (CH<sub>3</sub>), 13.88 (CH<sub>3</sub>).

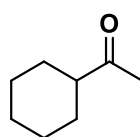**11d**

**Compound 11d:** According to the general procedure, the hydration of cyclohexylacetylene (54.1 mg, 0.50 mmol) afforded the title product (53.0 mg, 84%) as oil. <sup>1</sup>H NMR (500 MHz, CDCl<sub>3</sub>)  $\delta$  2.29 (ddd,  $J$  = 11.0, 7.2, 3.4 Hz, 1H), 2.10 (s, 3H), 1.88 – 1.81 (m, 2H), 1.75 (dt,  $J$  = 5.8, 2.7 Hz, 2H), 1.66 – 1.61 (m, 1H), 1.33 – 1.16 (m, 5H). <sup>13</sup>C NMR (126 MHz, CDCl<sub>3</sub>)  $\delta$  212.40 (CO), 51.54 (CH<sub>Cy</sub>), 28.52 (CH<sub>2</sub>), 27.96 (CH<sub>2</sub>), 25.95 (CH<sub>2</sub>), 25.72 (CH<sub>3</sub>).

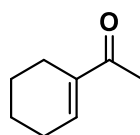**11e**

**Compound 11e:** According to the general procedure, the hydration of 1-ethynylcyclohexene (53.1 mg, 0.50 mmol) afforded the title product (57.0 mg, 92%) as oil. <sup>1</sup>H NMR (500 MHz, CDCl<sub>3</sub>)  $\delta$  6.91 – 6.86 (m, 1H), 2.26 (s, 3H), 2.25 – 2.18 (m, 4H), 1.64 – 1.56 (m, 4H). <sup>13</sup>C NMR (126 MHz, CDCl<sub>3</sub>)  $\delta$  199.48 (CO), 141.01 (C<sub>q</sub>), 139.80 (=CH-), 26.22 (CH<sub>2</sub>), 25.28 (CH<sub>2</sub>), 23.06 (CH<sub>2</sub>), 22.03 (CH<sub>2</sub>), 21.63 (CH<sub>3</sub>).

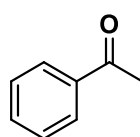**11f**

**Compound 11f:** According to the general procedure, the hydration of phenylacetylene (51.1 mg, 0.50 mmol) afforded the title product (55.0 mg, 92%) as oil. <sup>1</sup>H NMR (500 MHz, CDCl<sub>3</sub>)  $\delta$  7.96 (dd,  $J$  = 8.1, 1.0 Hz, 2H), 7.59 – 7.53 (m, 1H), 7.46 (dd,  $J$  = 10.7, 4.7 Hz, 2H), 2.61 (s, 3H). <sup>13</sup>C NMR (126 MHz, CDCl<sub>3</sub>)  $\delta$  198.37 (CO), 137.35 (C<sub>Ar</sub>), 133.32 (C<sub>Ar</sub>), 128.79 (C<sub>Ar</sub>), 128.53 (C<sub>Ar</sub>), 26.83 (CH<sub>3</sub>).

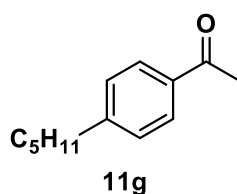

**Compound 11g:** According to the general procedure, the hydration of 1-ethynyl-4-pentylbenzene (86.1 mg, 0.50 mmol) afforded the title product (79.0 mg, 83%) as oil. <sup>1</sup>H NMR (500 MHz, CDCl<sub>3</sub>)  $\delta$  7.87 (d,  $J$  = 8.2 Hz, 2H), 7.25 (d,  $J$  = 8.2 Hz, 2H), 2.67 – 2.62 (m, 2H), 2.57 (s, 3H), 1.62 (dt,  $J$  = 15.0, 7.6 Hz, 2H), 1.36 – 1.28 (m, 4H), 0.88 (t,  $J$  = 7.0 Hz, 3H). <sup>13</sup>C NMR (126 MHz, CDCl<sub>3</sub>)  $\delta$  197.91, 148.91 (C<sub>Ar</sub>), 135.02 (C<sub>Ar</sub>), 128.69 (C<sub>Ar</sub>), 128.56 (C<sub>Ar</sub>), 36.05 (CH<sub>2</sub>), 31.52 (CH<sub>2</sub>), 30.89 (CH<sub>2</sub>), 26.61 (CH<sub>2</sub>), 22.59 (CH<sub>3</sub>), 14.08 (CH<sub>3</sub>).

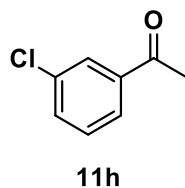

**Compound 11h:** According to the general procedure, the hydration of 3-chlorophenylacetylene (68.3 mg, 0.50 mmol) afforded the title product (60.0 mg, 78%) as oil. <sup>1</sup>H NMR (500 MHz, CDCl<sub>3</sub>)  $\delta$  7.92 (t,  $J$  = 1.8 Hz, 1H), 7.86 – 7.80 (m, 1H), 7.53 (ddd,  $J$  = 7.9, 2.0, 0.9 Hz, 1H), 7.41 (t,  $J$  = 7.9 Hz, 1H), 2.60 (s, 3H). <sup>13</sup>C NMR (126 MHz, CDCl<sub>3</sub>)  $\delta$  196.94 (CO), 138.84 (C<sub>Ar</sub>), 135.16 (C<sub>Ar</sub>), 133.27 (C<sub>Ar</sub>), 130.17 (C<sub>Ar</sub>), 128.66 (C<sub>Ar</sub>), 126.64 (C<sub>Ar</sub>), 26.88 (CH<sub>3</sub>).

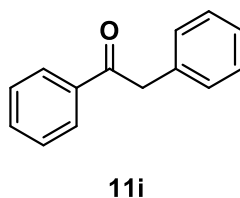

**Compound 11i:** According to the general procedure, the hydration of diphenylacetylene (89.1 mg, 0.50 mmol) afforded the title product (79.0 mg, 80%) as oil. <sup>1</sup>H NMR (500 MHz, CDCl<sub>3</sub>)  $\delta$  7.96 (dd,  $J$  = 5.2, 3.3 Hz, 2H), 7.53 – 7.46 (m, 1H), 7.40 (dd,  $J$  = 10.6, 4.8 Hz, 2H), 7.32 –

7.24 (m, 2H), 7.24 – 7.13 (m, 3H), 4.23 (s, 2H). <sup>13</sup>C NMR (126 MHz, CDCl<sub>3</sub>)  $\delta$  197.73 (CO), 136.73 (C<sub>Ar</sub>), 134.66 (C<sub>Ar</sub>), 133.28 (C<sub>Ar</sub>), 129.59 (C<sub>Ar</sub>), 128.79 (C<sub>Ar</sub>), 128.76 (C<sub>Ar</sub>), 128.73 (C<sub>Ar</sub>), 127.01 (C<sub>Ar</sub>), 45.62 (CH<sub>3</sub>).

## K. Additional Studies

Chart S1. Hydrocarboxylation of Alkynes using [Au(NHC)Cl] Complexes<sup>a</sup>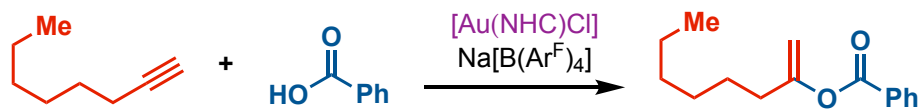

| Entry | Au(I)-NHC Catalyst                        | Yield (%)     | Yield (%)     |
|-------|-------------------------------------------|---------------|---------------|
|       |                                           | [Au] (1 mol%) | [Au] (2 mol%) |
| 1     | <b>1</b> : [Au(IPr <sup>#</sup> )Cl]      | 32            | 58            |
| 2     | <b>2</b> : [Au(Np <sup>#</sup> )Cl]       | 58            | 75            |
| 3     | <b>3</b> : [Au(BIAN-IPr <sup>#</sup> )Cl] | 25            | 47            |
| 4     | <b>4</b> : [Au(IPr*)Cl]                   | 16            | 63            |
| 5     | <b>5</b> : [Au(IPr)Cl]                    | 25            | 38            |

<sup>a</sup>Conditions: 1-Octyne (1.0 equiv), benzoic acid (1.2 equiv), [Au(NHC)Cl] (**1–5**) (1–2.0 mol%), NaBAr<sup>F</sup><sub>4</sub> (4.0 mol%), toluene (1.0 M), 80 °C, 15 h.

Chart S2. Hydroamination of Alkynes using [Au(NHC)Cl] Complexes<sup>a</sup>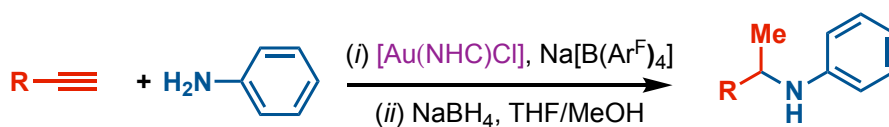

| Entry | Au(I)-NHC Catalyst                        | Yield (%) | Yield (%)                          |
|-------|-------------------------------------------|-----------|------------------------------------|
|       |                                           | R = Ph    | R = C <sub>6</sub> H <sub>13</sub> |
| 1     | <b>1</b> : [Au(IPr <sup>#</sup> )Cl]      | 89        | 85                                 |
| 2     | <b>2</b> : [Au(Np <sup>#</sup> )Cl]       | 93        | 87                                 |
| 3     | <b>3</b> : [Au(BIAN-IPr <sup>#</sup> )Cl] | 90        | 81                                 |
| 4     | <b>4</b> : [Au(IPr*)Cl]                   | 89        | 83                                 |
| 5     | <b>5</b> : [Au(IPr)Cl]                    | 91        | 75                                 |

<sup>a</sup>Conditions: Alkyne (1.0 equiv), aniline (1.2 equiv), [Au(NHC)Cl] (**1–5**) (x mol%), NaBAr<sup>F</sup><sub>4</sub> (2 x mol%), 50 °C, 15 h. R = Ph, [Au] = 0.01 mol%; R = C<sub>6</sub>H<sub>13</sub>, [Au] = 1.5 mol%.



**Chart S3.** Hydration of Alkynes using [Au(NHC)Cl] Complexes<sup>a</sup>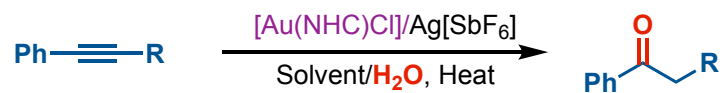

| Entry | Au(I)-NHC<br>Catalyst                    | Yield (%)<br>R = Ph |
|-------|------------------------------------------|---------------------|
| 1     | <b>1:</b> [Au(IPr <sup>#</sup> )Cl]      | 22                  |
| 2     | <b>2:</b> [Au(Np <sup>#</sup> )Cl]       | 59                  |
| 3     | <b>3:</b> [Au(BIAN-IPr <sup>#</sup> )Cl] | 16                  |
| 4     | <b>4:</b> [Au(IPr*)Cl]                   | 30                  |
| 5     | <b>5:</b> [Au(IPr)Cl]                    | 42                  |

<sup>a</sup>Conditions: Alkyne (1.0 equiv), [Au(NHC)Cl] (**1-5**) (x mol%), AgSbF<sub>4</sub>. [Au] = 0.01 mol%, dioxane/water, 110 °C, 65 h.

## **L. Details of Crystal Structure Analysis**

Crystallographic information for all the compounds is given in Table S1 in the Supporting Information. All compounds were colorless single crystals. Full datasets were collected using graphite-monochromated CuK $\alpha$  radiation ( $\lambda = 1.54178 \text{ \AA}$ ) on a Bruker SMART APEX2 single crystal diffractometer. X-rays were provided by a fine-focus sealed X-ray tube operated at 48kV and 30mA. Lattice constants were all determined using the Bruker SAINT software package using all available reflections (after data collection, ORTEP files, see Figures S1-S3).

All data were corrected for absorption by measuring the faces of each crystal and doing a numerical absorption correction. The Bruker software package SHELXTL-2014 was used to solve all the structures using the direct methods technique and difference electron density maps. All stages of weighted full-matrix least-squares refinement were conducted using  $F_o^2$  data with the same software package. The final structural model for each compound was refined using anisotropic thermal parameters for all non-hydrogen atoms; all the H atoms were located in difference maps but were placed in geometrically idealized positions and allowed to “ride” on their parent C, O or N atoms, with bond lengths of 0.95, 1.00, 0.99, 0.98, and 0.84  $\text{\AA}$  for aromatic, methine, methylene, methyl, and hydroxyl, respectively. The isotropic thermal parameters for these H atoms were fixed to be 1.2 times the  $U_{\text{iso}}$  for C or N and 1.5 times the  $U_{\text{iso}}$  for O.

Details for all the structures are given in Table S1. Also included in this table is the largest shifts/s.u. for the final cycle of refinement and the largest maxima and minima in any of the final difference maps.

**Table S1.** Crystal Data and Structure Refinement Summaries for [Au(Np<sup>#</sup>)Cl] (**2**).

| Compound                                                                                                                                              | <b>2</b>                                                                                                                           |
|-------------------------------------------------------------------------------------------------------------------------------------------------------|------------------------------------------------------------------------------------------------------------------------------------|
| Chemical formula                                                                                                                                      | C <sub>101</sub> H <sub>76</sub> AuClN <sub>2</sub> ·CH <sub>2</sub> Cl <sub>2</sub>                                               |
| $M_r$                                                                                                                                                 | 1634.98                                                                                                                            |
| Crystal system, space group                                                                                                                           | Triclinic, <i>P</i> 1                                                                                                              |
| Temperature (K)                                                                                                                                       | 100                                                                                                                                |
| $a, b, c$ (Å)                                                                                                                                         | 9.8807 (2), 19.9006 (4), 20.5724 (4)                                                                                               |
| $\alpha, \beta, \gamma$ (°)                                                                                                                           | 91.843 (1), 101.967 (1), 101.976 (1)                                                                                               |
| $V$ (Å <sup>3</sup> )                                                                                                                                 | 3859.18 (13)                                                                                                                       |
| $Z$                                                                                                                                                   | 2                                                                                                                                  |
| Radiation type                                                                                                                                        | Cu $K\alpha$                                                                                                                       |
| $\mu$ (mm <sup>-1</sup> )                                                                                                                             | 4.93                                                                                                                               |
| Crystal size (mm)                                                                                                                                     | 0.33 × 0.27 × 0.14                                                                                                                 |
| Data collection                                                                                                                                       |                                                                                                                                    |
| Diffractometer                                                                                                                                        | Bruker <i>SMART</i> CCD Apex-II area-detector                                                                                      |
| Absorption correction                                                                                                                                 | Numerical<br><i>SADABS</i> 2016/2: Krause, L., Herbst-Irmer, R., Sheldrick G.M. & Stalke D., <i>J. Appl. Cryst.</i> 48 (2015) 3-10 |
| $T_{\min}, T_{\max}$                                                                                                                                  | 0.334, 0.632                                                                                                                       |
| No. of measured, independent and observed [ $I > 2\sigma(I)$ ] reflections                                                                            | 43421, 12981, 12738                                                                                                                |
| $R_{\text{int}}$                                                                                                                                      | 0.027                                                                                                                              |
| $(\sin \theta/\lambda)_{\text{max}}$ (Å <sup>-1</sup> )                                                                                               | 0.596                                                                                                                              |
| Refinement                                                                                                                                            |                                                                                                                                    |
| $R[F^2 > 2\sigma(F^2)], wR(F^2), S$                                                                                                                   | 0.022, 0.053, 1.06                                                                                                                 |
| No. of reflections                                                                                                                                    | 12981                                                                                                                              |
| No. of parameters                                                                                                                                     | 974                                                                                                                                |
| H-atom treatment                                                                                                                                      | H-atom parameters constrained                                                                                                      |
| $\Delta\rho_{\text{max}}, \Delta\rho_{\text{min}}$ (e Å <sup>-3</sup> )                                                                               | 1.57, -0.57                                                                                                                        |
| Computer programs: <i>APEX 2</i> (Bruker, 2006), <i>APEX 2</i> , <i>SAINT</i> (Bruker, 2005), <i>SHELXL2016/6</i> (Sheldrick, 2016), <i>SHELXTL</i> . |                                                                                                                                    |

**Figure S1.** ORTEP Structure of [Au(Np<sup>#</sup>)Cl] (**2**) (50% ellipsoids). (Crystallographic data has been deposited with the Cambridge Crystallographic Data Center as supplementary publication no. CCDC 2260430).

Front View:

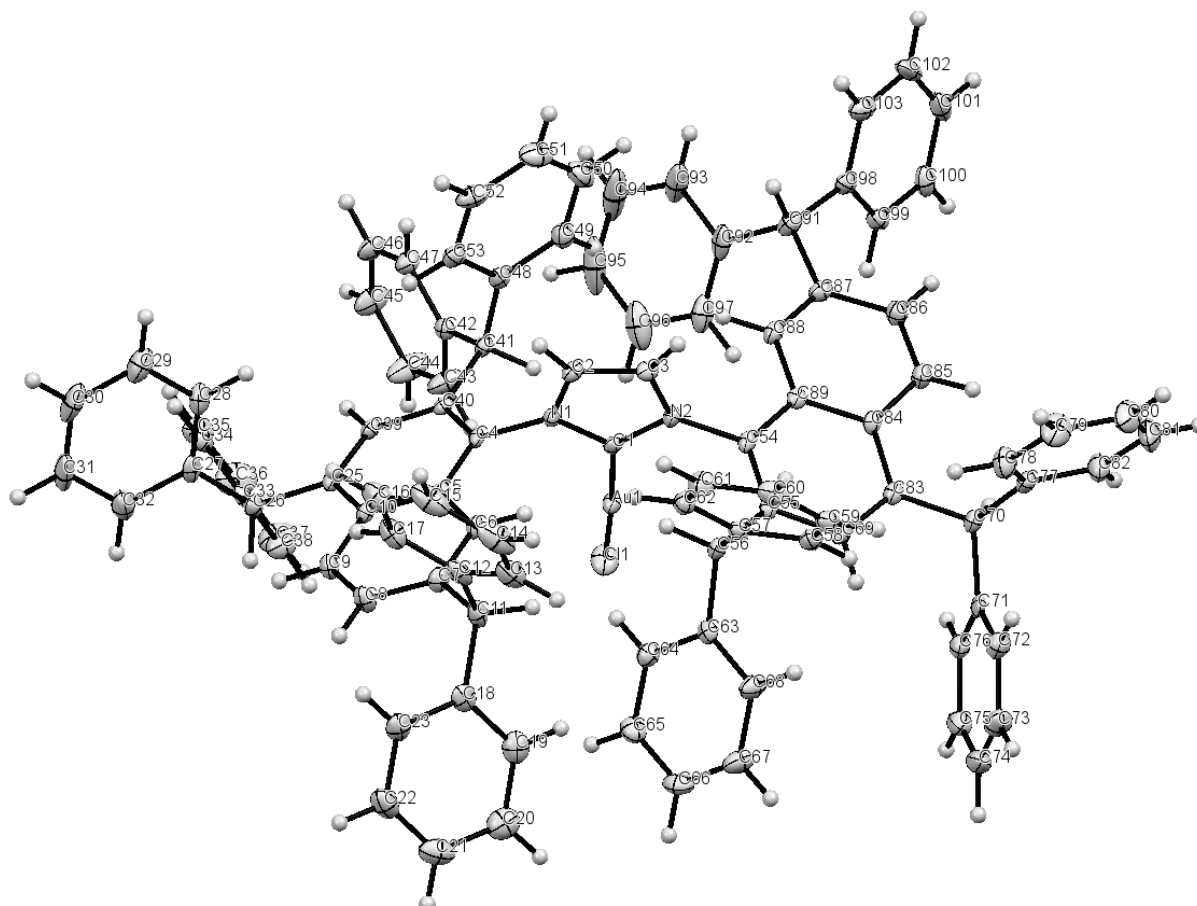

Selected bond lengths [Å], bond angle [°] and dihedral angles [°] (**2**): Au1–C11, 2.2823(7); Au1–C1, 1.983(2); C1–N1, 1.358(3); C1–N2, 1.353(2); N1–C4, 1.443(2); N2–C54, 1.440(3); Cl1–Au1–C1, 174.31(6); Au1–C1–N1, 125.3(1); Au1–C1–N2, 129.5(1); Au1–C1–N1–C4, 11.4(3); Au1–C1–N2–C54, 19.0(3); C89–C54–N2–C1, 101.9(2); C55–C54–N2–C1, 78.2(3); C40–C4–N1–C1, 79.0(3); C5–C4–N1–C1, 100.3(2); C54–N2–N1–C4, 16.9(7).

**Figure S2.** ORTEP Structure of [Au(NP<sup>#</sup>)Cl] (**2**) (50% ellipsoids). (Crystallographic data has been deposited with the Cambridge Crystallographic Data Center as supplementary publication no. CCDC 2260430).

Side View:

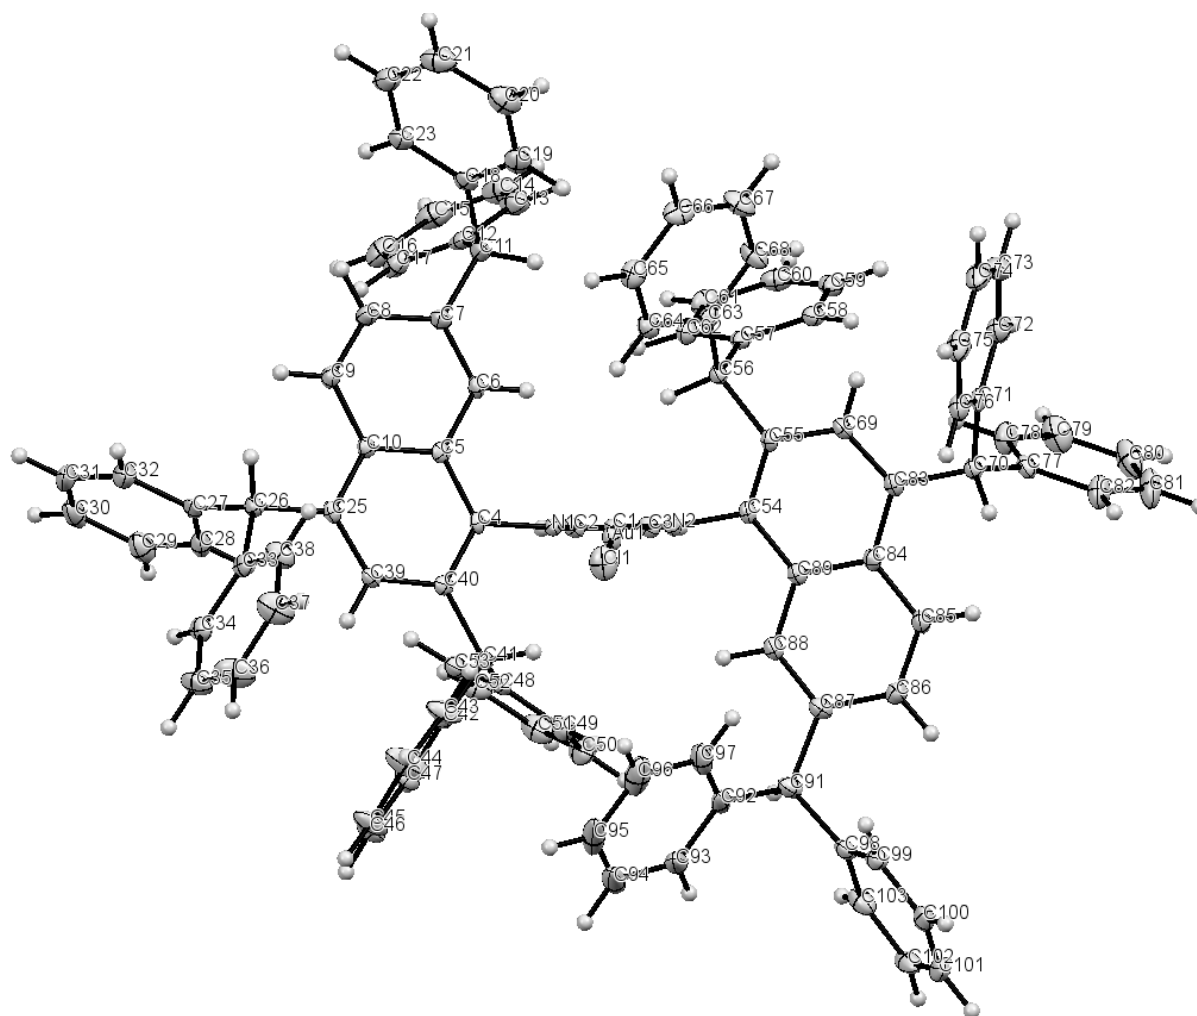

Selected bond lengths [Å], bond angle [°] and dihedral angles [°] (**2**): Au1–C11, 2.2823(7); Au1–C1, 1.983(2); C1–N1, 1.358(3); C1–N2, 1.353(2); N2–C54, 1.440(3); N1–C4, 1.443(2); C11–Au1–C1, 174.31(6); Au1–C1–N1, 125.3(1); Au1–C1–N2, 129.5(1); Au1–C1–N1–C4, 11.4(3); Au1–C1–N2–C54, 19.0(3); C89–C54–N2–C1, 101.9(2); C55–C54–N2–C1, 78.2(3); C40–C4–N1–C1, 79.0(3); C5–C4–N1–C1, 100.3(2); C54–N2–N1–C4, 16.9(7).

**Figure S3.** Topographical steric map of complex [Au(Np<sup>#</sup>)Cl] (**2**). X-ray single crystal structure, showing %V<sub>bur</sub> per quadrant.

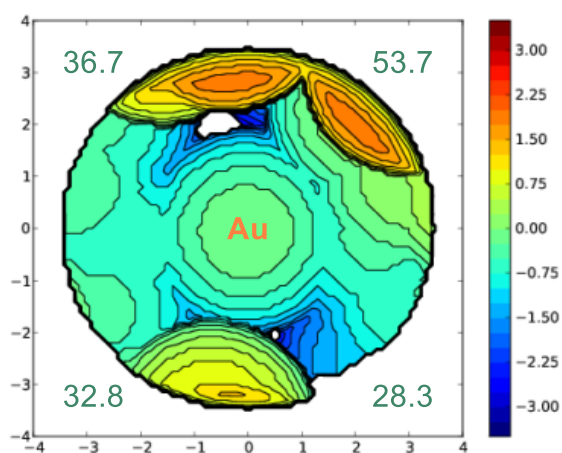

[Au(NP<sup>#</sup>)Cl]  
%V<sub>bur</sub> = 46.2

## Computational Methods

**Computational Methods.** All the calculations were performed using Gaussian 09 suite of programs. All of the geometry optimizations were performed at the B3LYP level of theory in the gas phase with the QZVP basis set for gold and the 6-311++G(d,p) basis set for the other atoms. For geometry optimizations, we employed the X-ray structures of [(Np<sup>#</sup>)AuCl], [(IPr<sup>\*</sup>)AuCl] and [(IPr)AuCl] as the starting geometry and performed full optimization. The absence of imaginary frequencies was used to characterize the structures as minima on the potential energy surface. All of the optimized geometries were verified as minima (no imaginary frequencies). NBO calculations were performed at the DFT/B3LYP level using NBO program implemented in Gaussian software package. Energetic parameters were calculated under standard conditions (298.15 K and 1 atm). Structural representations were generated using CYLview software (Legault, C. Y. CYL view version 1.0 BETA, University of Sherbrooke). All other representations were generated using Gauss View (GaussView, version 5, Dennington, R.; Keith, T.; Millam, J. Semichem Inc., Shawnee Mission, KS, 2009) or ChemCraft software (Andrienko, G. L. ChemCraft version b562a, <https://www.chemcraftprog.com>).

### Full Reference for Gaussian 09

Gaussian 09, Revision D.01, Frisch, M. J.; Trucks, G. W.; Schlegel, H. B.; Scuseria, G. E.; Robb, M. A.; Cheeseman, J. R.; Scalmani, G.; Barone, V.; Mennucci, B.; Petersson, G. A.; Nakatsuji, H.; Caricato, M.; Li, X.; Hratchian, H. P.; Izmaylov, A. F.; Bloino, J.; Zheng, G.; Sonnenberg, J. L.; Hada, M.; Ehara, M.; Toyota, K.; Fukuda, R.; Hasegawa, J.; Ishida, M.; Nakajima, T.; Honda, Y.; Kitao, O.; Nakai, H.; Vreven, T.; Montgomery, J. A., Jr.; Peralta, J. E.; Ogliaro, F.; Bearpark, M.; Heyd, J. J.; Brothers, E.; Kudin, K. N.; Staroverov, V. N.; Kobayashi, R.; Normand, J.; Raghavachari, K.; Rendell, A.; Burant, J. C.; Iyengar, S. S.; Tomasi, J.; Cossi, M.; Rega, N.; Millam, M. J.; Klene, M.; Knox, J. E.; Cross, J. B.; Bakken, V.; Adamo, C.; Jaramillo, J.; Gomperts, R.; Stratmann, R. E.; Yazyev, O.; Austin, A. J.; Cammi, R.; Pomelli, C.; Ochterski, J. W.; Martin, R. L.; Morokuma, K.; Zakrzewski, V. G.; Voth, G. A.; Salvador, P.; Dannenberg, J. J.; Dapprich, S.; Daniels, A. D.; Farkas, Ö.; Foresman, J. B.; Ortiz, J. V.; Cioslowski, J.; Fox, D. J. Gaussian, Inc., Wallingford CT, 2009.



**Figure S4.** Topographical steric maps of complexes [Au(Np<sup>#</sup>)Cl] (*anti*) (**2**), [Au(Np<sup>#</sup>)Cl] (*syn*) (**2**), [Au(IPr<sup>\*</sup>)Cl] (**4**) and [Au(IPr)Cl] (**5**) at the B3LYP 6-311++g(d,p) level.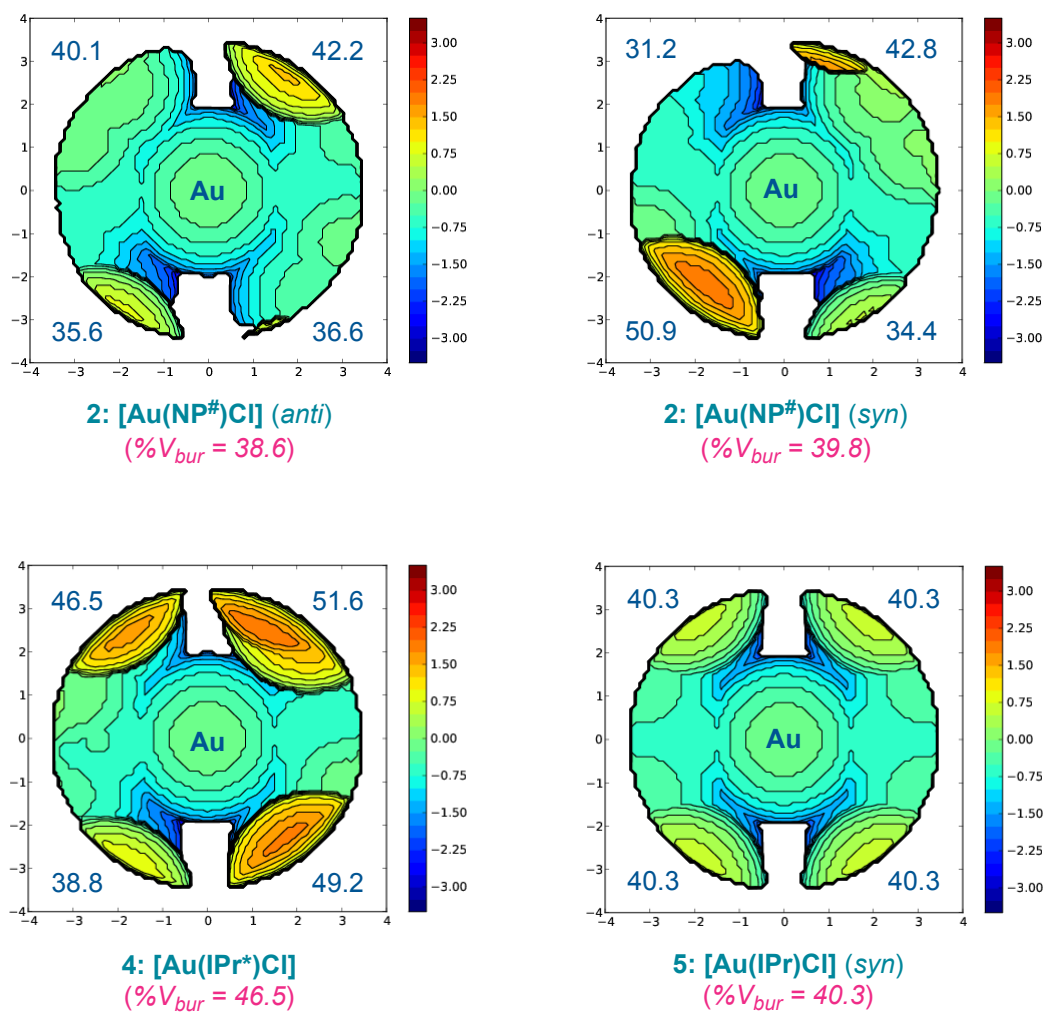

**Figure S5.** Graphical Representation of Frontier Orbitals of Complexes [Au(Np<sup>#</sup>)Cl] (*anti*) (**2**), [Au(Np<sup>#</sup>)Cl] (*syn*) (**2**), [Au(IPr<sup>\*</sup>)Cl] (**4**) and [Au(IPr)Cl] (**5**) at the B3LYP 6-311++g(d,p) Level.

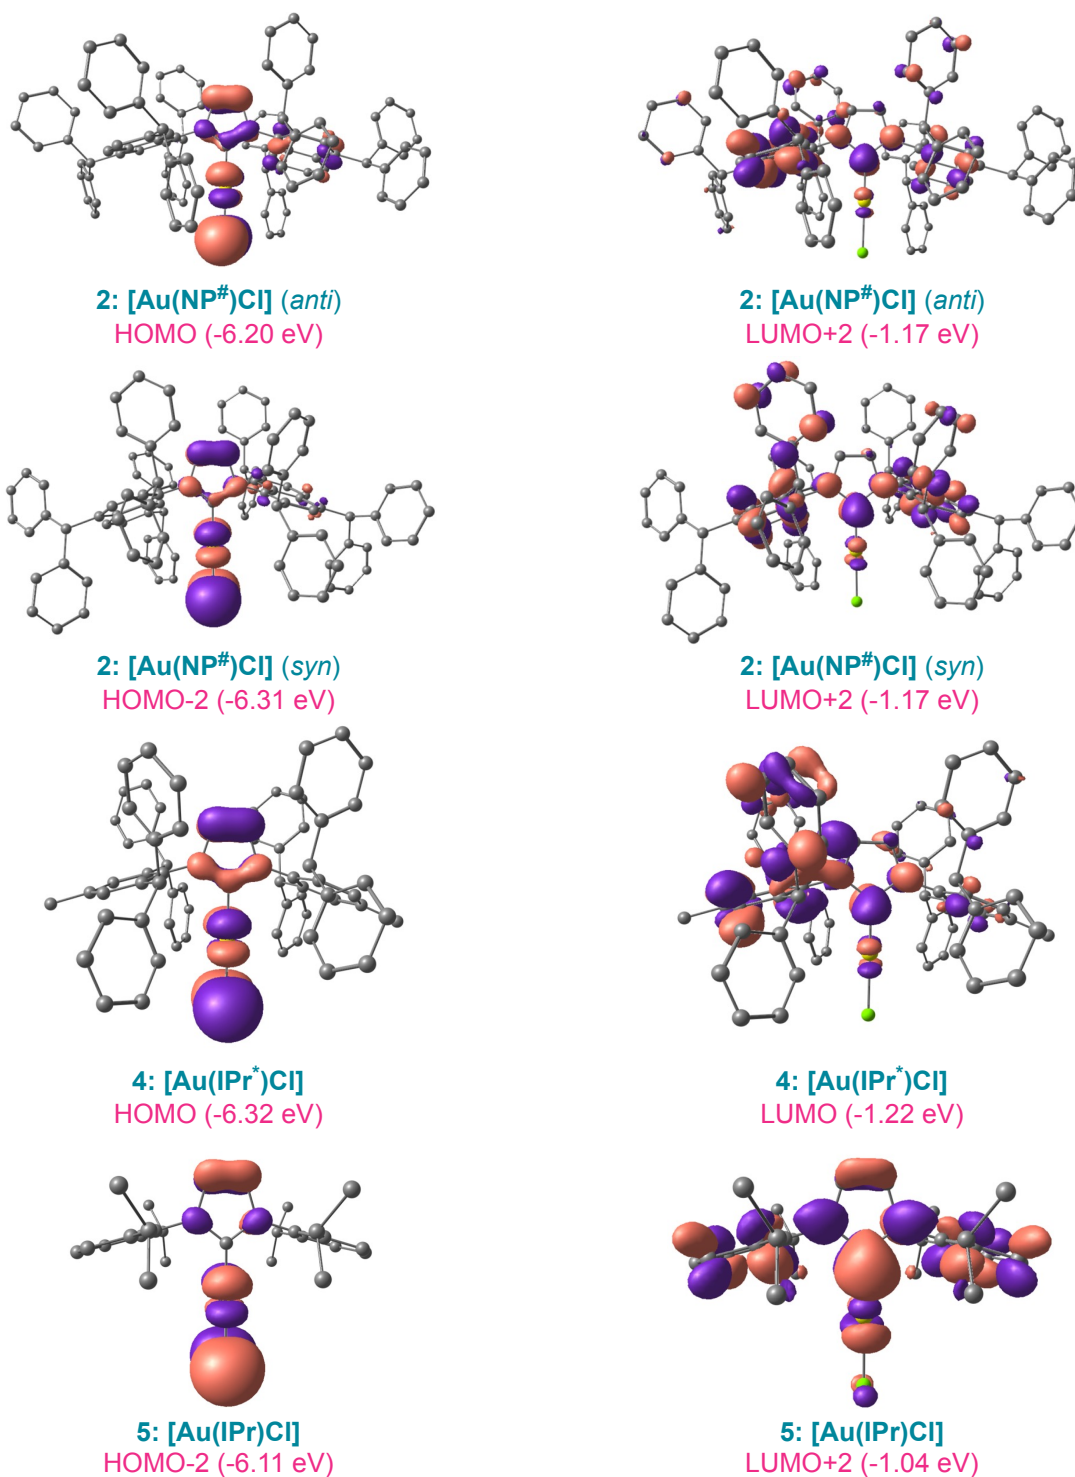

**Table S2.** HOMO and LUMO Energy Levels Calculated at the B3LYP 6-311++g(d,p) Level

| entry          | compound                               | orbital | E<br>[au] | E<br>[eV] | $\Delta E^a$<br>[eV] |
|----------------|----------------------------------------|---------|-----------|-----------|----------------------|
| 1              | [Au(Np <sup>#</sup> )Cl] ( <b>2</b> )  | HOMO    | -0.2279   | -6.20     | 5.03 <sup>b</sup>    |
| 2 <sup>d</sup> | ( <i>anti</i> )                        | LUMO+2  | -0.0431   | -1.17     |                      |
| 3 <sup>e</sup> | [Au(Np <sup>#</sup> )Cl] ( <b>2</b> )  | HOMO-2  | -0.2320   | -6.31     | 5.14 <sup>c</sup>    |
| 4 <sup>d</sup> | ( <i>syn</i> )                         | LUMO+2  | -0.0429   | -1.17     |                      |
| 5              | [Au(IPr <sup>*</sup> )Cl] ( <b>4</b> ) | HOMO    | -0.2321   | -6.32     | 5.10                 |
| 6              |                                        | LUMO    | -0.0447   | -1.22     |                      |
| 7              | [Au(IPr)Cl] ( <b>5</b> )               | HOMO    | -0.2284   | -6.21     | 5.17                 |
| 8              |                                        | LUMO    | -0.0382   | -1.04     |                      |

<sup>a</sup> $\Delta E = E_{LUMO} - E_{HOMO}$ . <sup>b</sup> $\Delta E = E_{LUMO+2} - E_{HOMO}$ . <sup>c</sup> $\Delta E = E_{LUMO+2} - E_{HOMO-2}$ . <sup>d</sup>LUMO+2 and <sup>e</sup>HOMO-2 due to required symmetry.

## References

1. Zhao, Q.; Meng, G.; Li, G.; Flach, C.; Mendelsohn, R.; Lalancette, R.; Szostak, R.; Szostak, M. IPr<sup>#</sup>-Highly Hindered, Broadly Applicable N-Heterocyclic Carbenes. *Chem. Sci.* **2021**, *12*, 10583–10589.
2. Gomez-Suarez, A.; Ramon, R. S.; Songis, O.; Slawin, A. M. Z.; Cazin, C. S. J.; Nolan, S. P. Influence of a Very Bulky N-Heterocyclic Carbene in Gold-Mediated Catalysis. *Organometallics* **2011**, *30*, 5463–5470.
3. Fremont, P.; Scott, N. M.; Stevens, E. D.; Nolan, S. P. Synthesis and Structural Characterization of N-Heterocyclic Carbene Gold(I) Complexes. *Organometallics* **2005**, *24*, 2411–2418.
4. Kleman, P.; Gonzalez-Liste, P. J.; Garcia-Garrido, S. E.; Cadierno, V.; Pizzano, A. Highly Enantioselective Hydrogenation of 1-Alkylvinyl Benzoates: A Simple, Nonenzymatic Access to Chiral 2-Alkanols. *Chem. Eur. J.* **2013**, *19*, 16209–16212.
5. Dupuy, S.; Gasperini, D.; Nolan, S. P. Highly Efficient Gold(I)-Catalyzed Regio- and Stereoselective Hydrocarboxylation of Internal Alkynes. *ACS Catal.* **2015**, *5*, 6918–6921.
6. Chary, B. C.; Kim, S. Gold(I)-Catalyzed Addition of Carboxylic Acids to Alkynes. *J. Org. Chem.* **2010**, *75*, 7928–7931.
7. Zhao, Y.; Lin, M.; Chen, Z.; Pei, H.; Li, Y.; Chen, Y.; Wang, X.; Li, L.; Cao, Y.; Zhang, Y.; Li, W. Titanium and zirconium amido complexes supported by imidazole-containing ligands: syntheses, characterization and catalytic activities. *RSC Adv.* **2012**, *2*, 144–150.
8. Brunet, J.-J.; Chu, N. C.; Diallo, O. Intermolecular Highly Regioselective Hydroamination of Alkenes with Ligandless Platinum(II) Catalysts in Ionic Solvents: Activation Role of n-Bu<sub>4</sub>PBr. *Organometallics* **2005**, *24*, 3104–3110.
9. Arnold, J. S.; Stone, R. F.; Nguyen, H. M. Rhodium-Catalyzed Regioselective Amination of Secondary Allylic Trichloroacetimidates with Unactivated Aromatic Amines. *Org. Lett.* **2010**, *12*, 4580–4583.
10. Southam, R. M.; Whiting, M. C. Classical carbonium ions. Part 12. The deamination of 1- and 4-amino-n-octane. *J. C. S. Perkin II* **1982**, 597–603.
11. Khedkar, V.; Tillack, A.; Beller, M. A Dramatic Effect of Aryloxo Ligands on the Titanium-Catalyzed Hydroamination of Alkynes. *Org. Lett.* **2003**, *5*, 4767–4770.

12. Wang, Z.; Ye, X.; Wei, S.; Wu, P.; Zhang, A.; Sun, J. A Highly Enantioselective Lewis Basic Organocatalyst for Reduction of N-Aryl Imines with Unprecedented Substrate Spectrum. *Org. Lett.* **2006**, *8*, 999–1001.
13. Babu, N. S.; Reddy, K. .; Prasad, P. S. S.; Suryanarayana, I.; Lingaiah, N. Intermolecular hydroamination of vinyl arenes using tungstophosphoric acid as a simple and efficient catalyst. *Tetrahedron Lett.* **2007**, *48*, 7642–7645.
14. Weitershaus, K.; Ward, B. D.; Kubiak, R.; Muller, C.; Wadepohl, H.; Doye, S.; Gade, L. H. Titanium hydroamination catalysts bearing a 2-aminopyrrolinato spectator ligand: monitoring the individual reaction steps. *Dalton Trans.* **2009**, 4586–4602.
15. Heidrich, M.; Bergmann, M.; Muller-Borges, D.; Plenio, H. Bis(pentapyridenyl)-N-Heterocyclic Carbene (NHC) Gold Complexes: Highly Active Catalysts for the Room Temperature Hydration of Alkynes. *Adv. Synth. Catal.* **2018**, *360*, 3572–3578.
16. Marion, N.; Ramon, R. S.; Nolan, S. P. [(NHC)AuI]-Catalyzed Acid-Free Alkyne Hydration at Part-per-Million Catalyst Loadings. *J. Am. Chem. Soc.* **2009**, *131*, 448–449.
17. Wong, W.-L.; Ho, K.-P.; Lee, L. Y. S.; Lam, K.-M.; Zhou, Z.-Y.; Chan, T. H.; Wong, K. Y. Sulfuric Acid-Catalyzed Conversion of Alkynes to Ketones in an Ionic Liquid Medium under Mild Reaction Conditions. *ACS Catal.* **2011**, *1*, 116–119.
18. Xu, C.; Du, W.; Zeng, Y.; Dai, B.; Guo, H. Reactivity Switch Enabled by Counterion: Highly Chemoselective Dimerization and Hydration of Terminal Alkynes. *Org. Lett.* **2014**, *16*, 948–951.

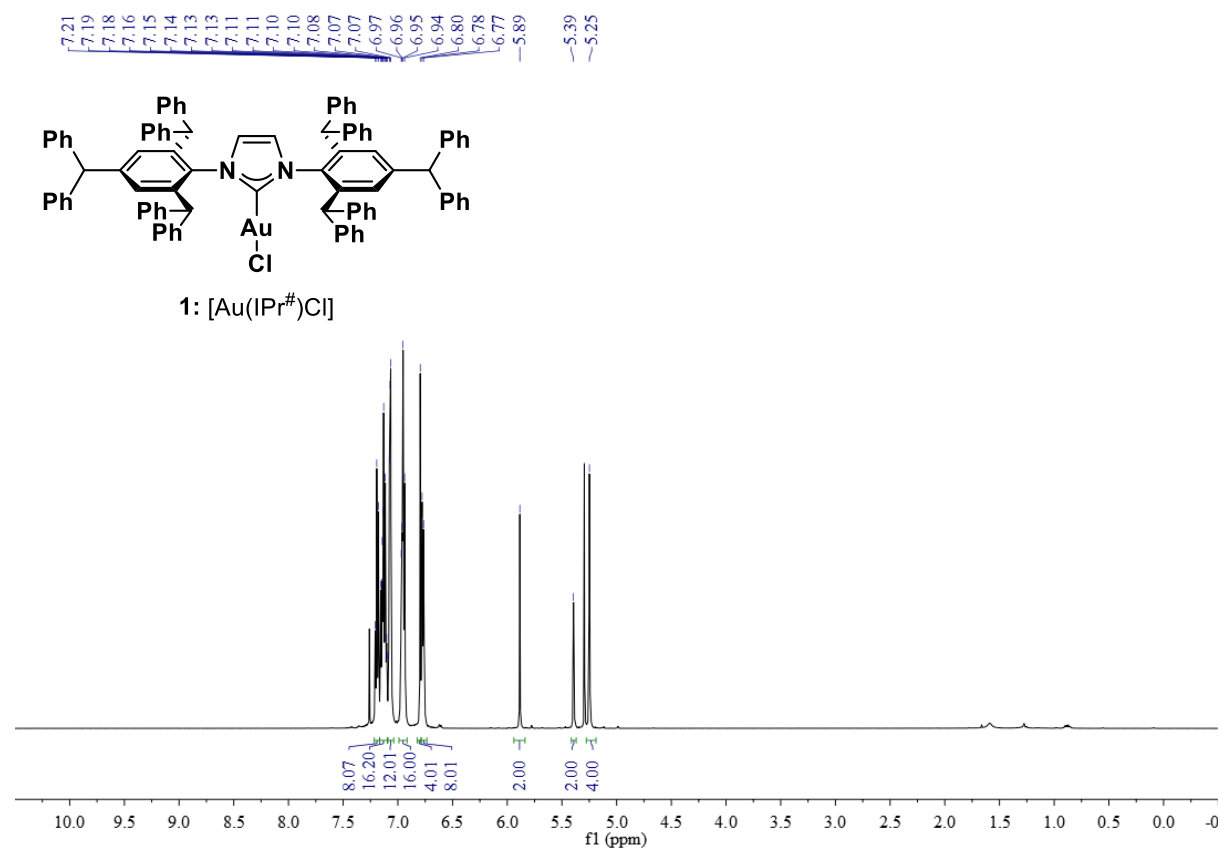

<sup>1</sup>H NMR (500 MHz, CDCl<sub>3</sub>) Spectrum of [Au(IPr<sup>#</sup>)Cl] (**1**).

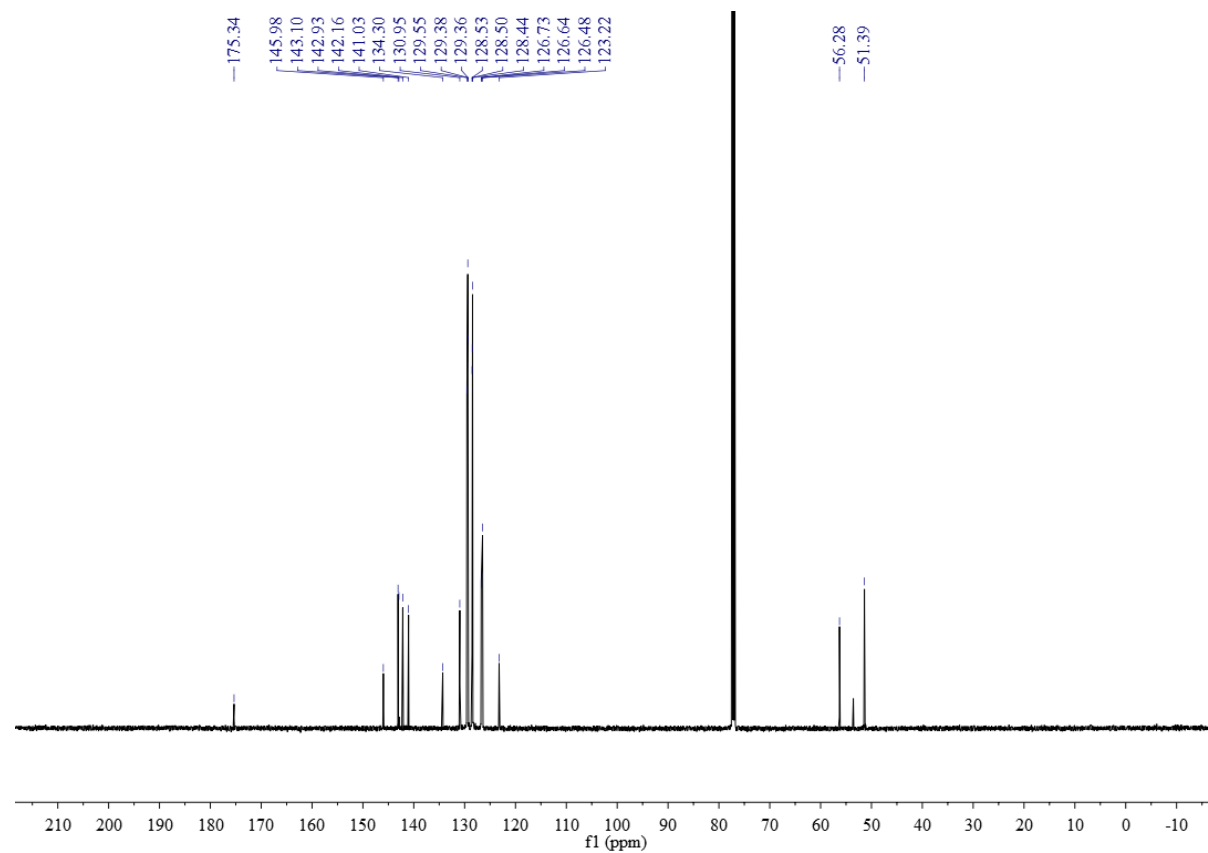

<sup>13</sup>C NMR (126 MHz, CDCl<sub>3</sub>) Spectrum of [Au(IPr<sup>#</sup>)Cl] (**1**).

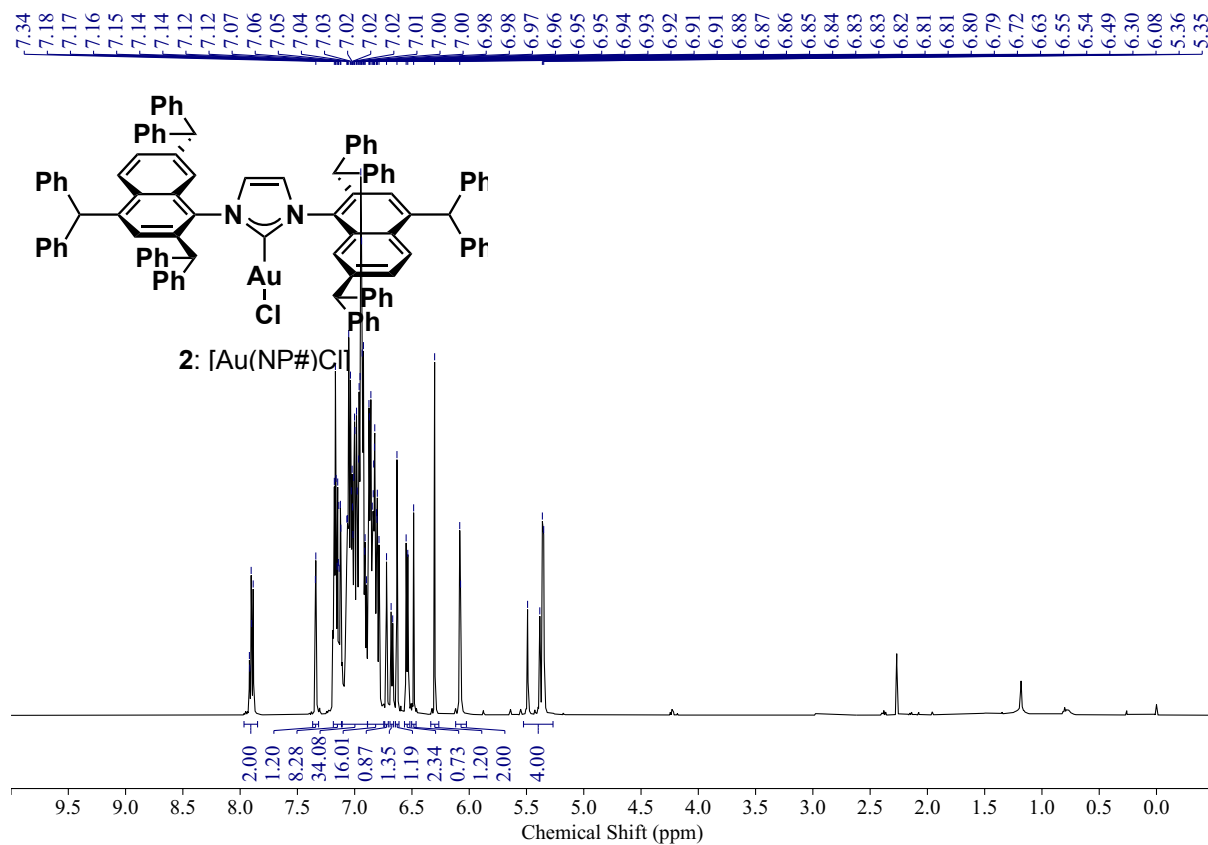

<sup>1</sup>H NMR (500 MHz, CDCl<sub>3</sub>) Spectrum of [Au(NP<sup>#</sup>)Cl] (2).

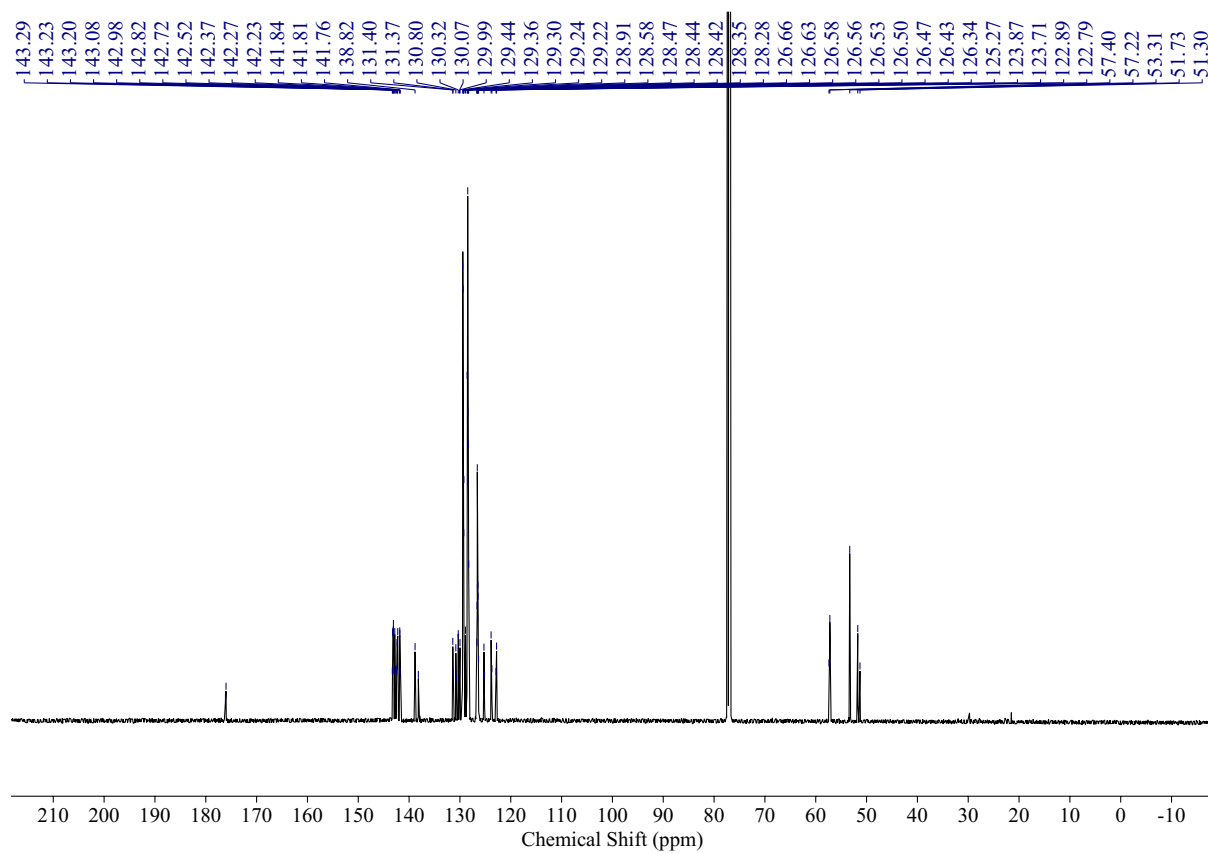

<sup>13</sup>C NMR (126 MHz, CDCl<sub>3</sub>) Spectrum of [Au(NP<sup>#</sup>)Cl] (2).

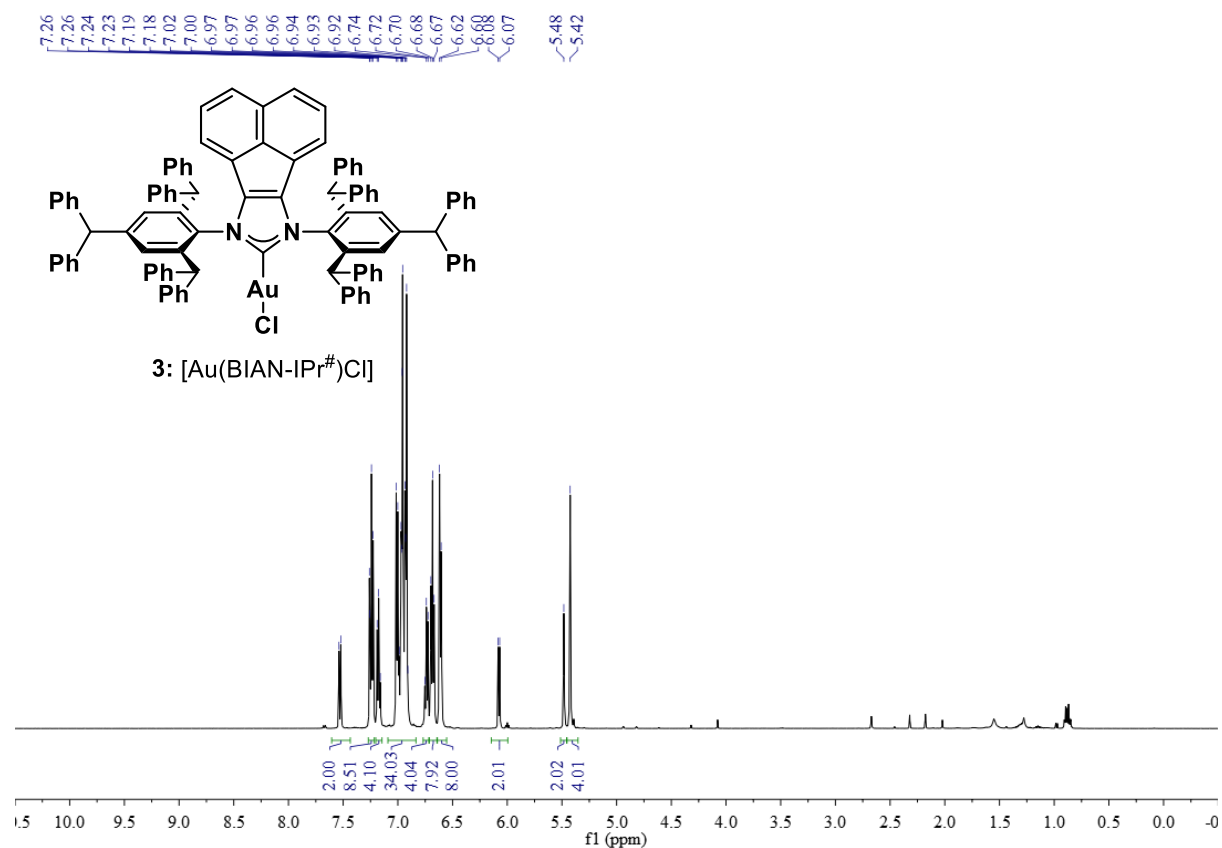

<sup>1</sup>H NMR (500 MHz, CDCl<sub>3</sub>) Spectrum of [Au(BIAN-IPr<sup>#</sup>)Cl] (**3**).

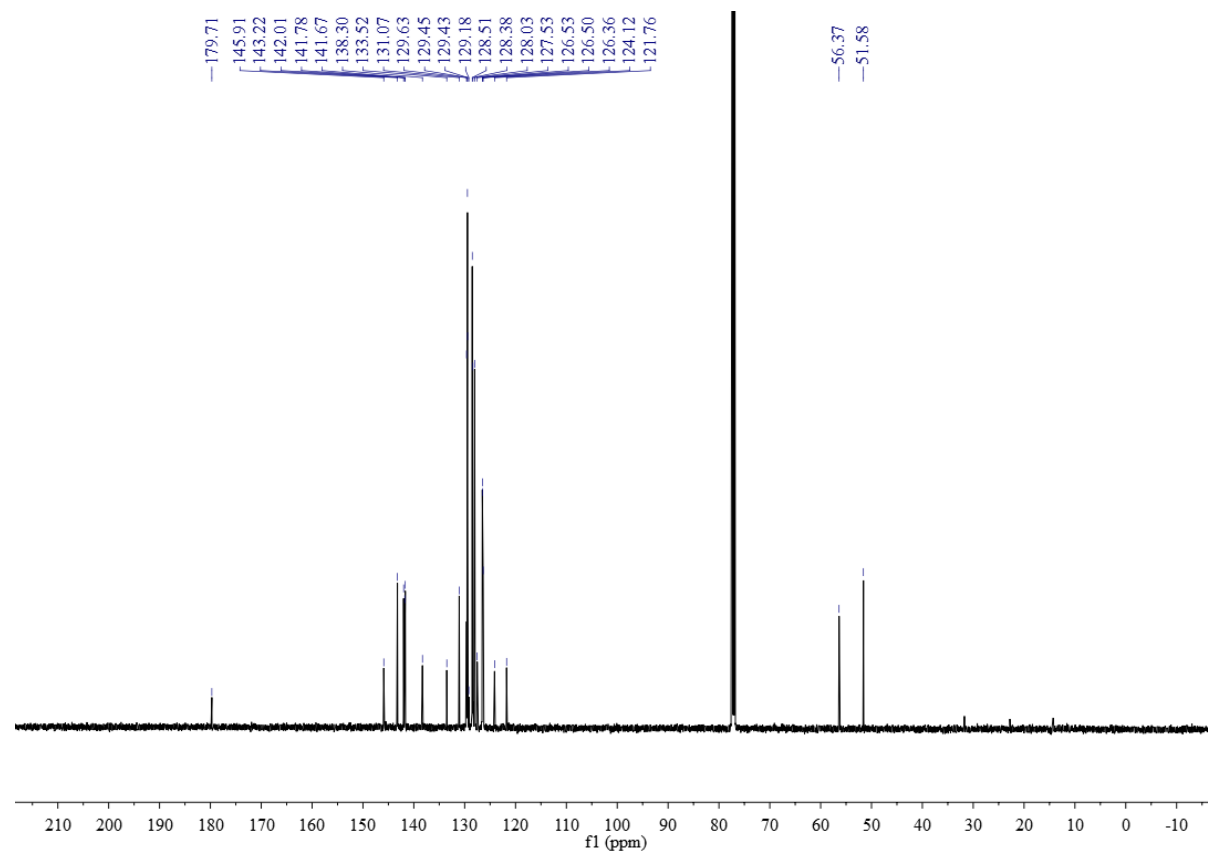

<sup>13</sup>C NMR (126 MHz, CDCl<sub>3</sub>) Spectrum of [Au(BIAN-IPr<sup>#</sup>)Cl] (**3**).



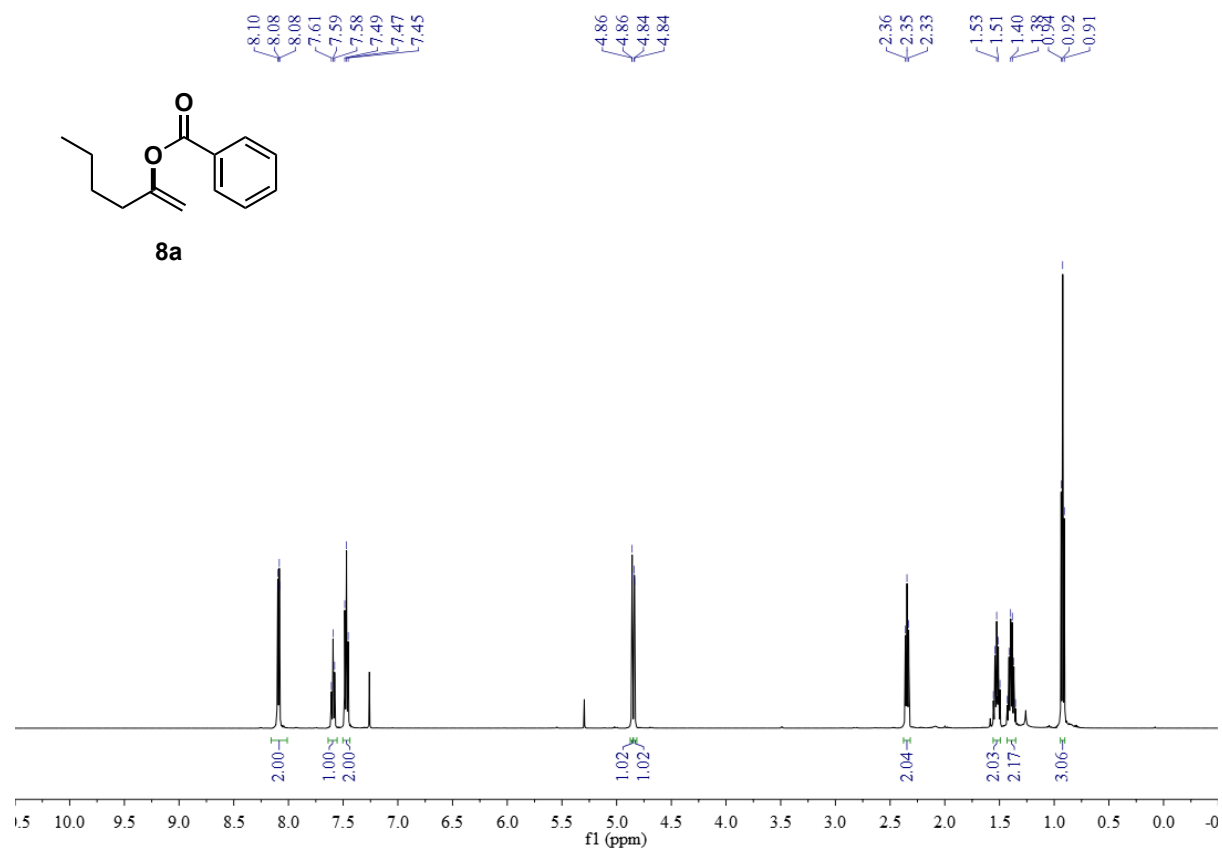

<sup>1</sup>H NMR (500 MHz, CDCl<sub>3</sub>) Spectrum of Compound **8a**.

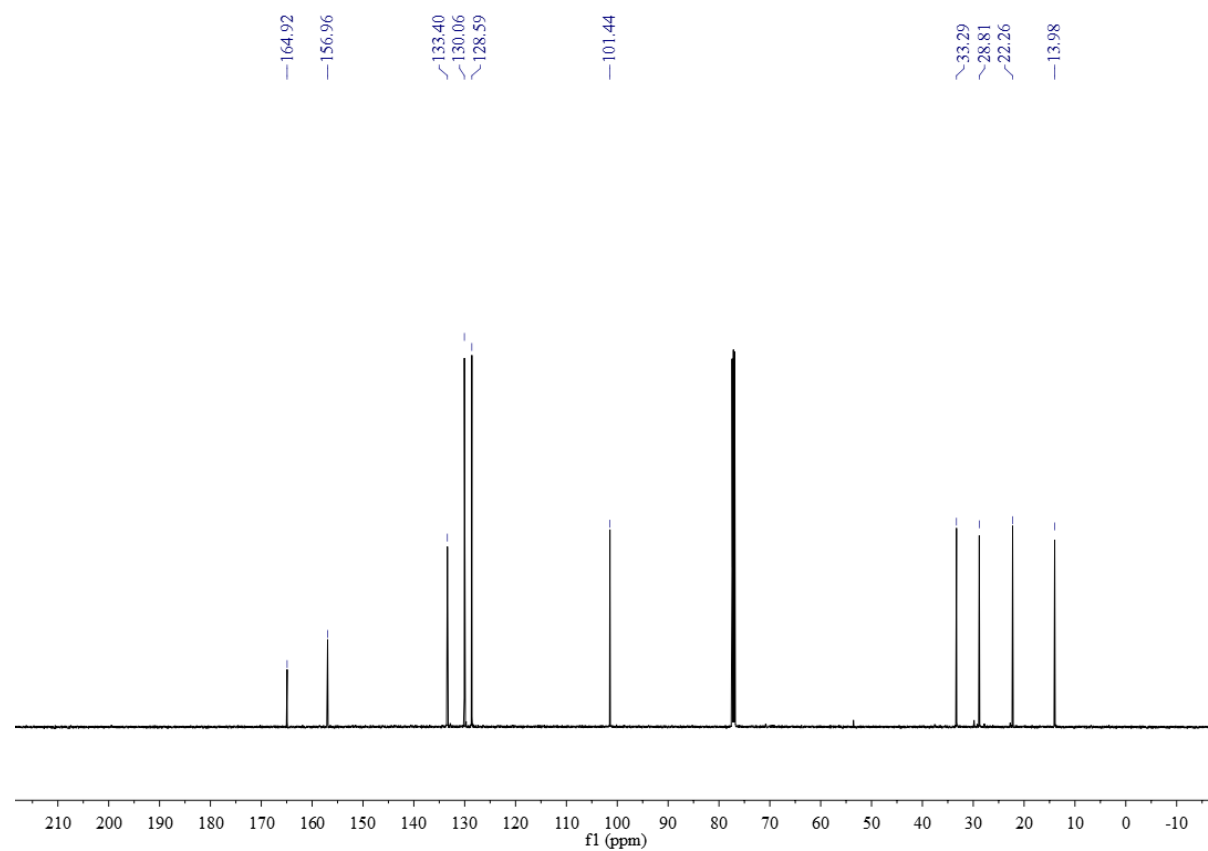

<sup>13</sup>C NMR (126 MHz, CDCl<sub>3</sub>) Spectrum of Compound **8a**.

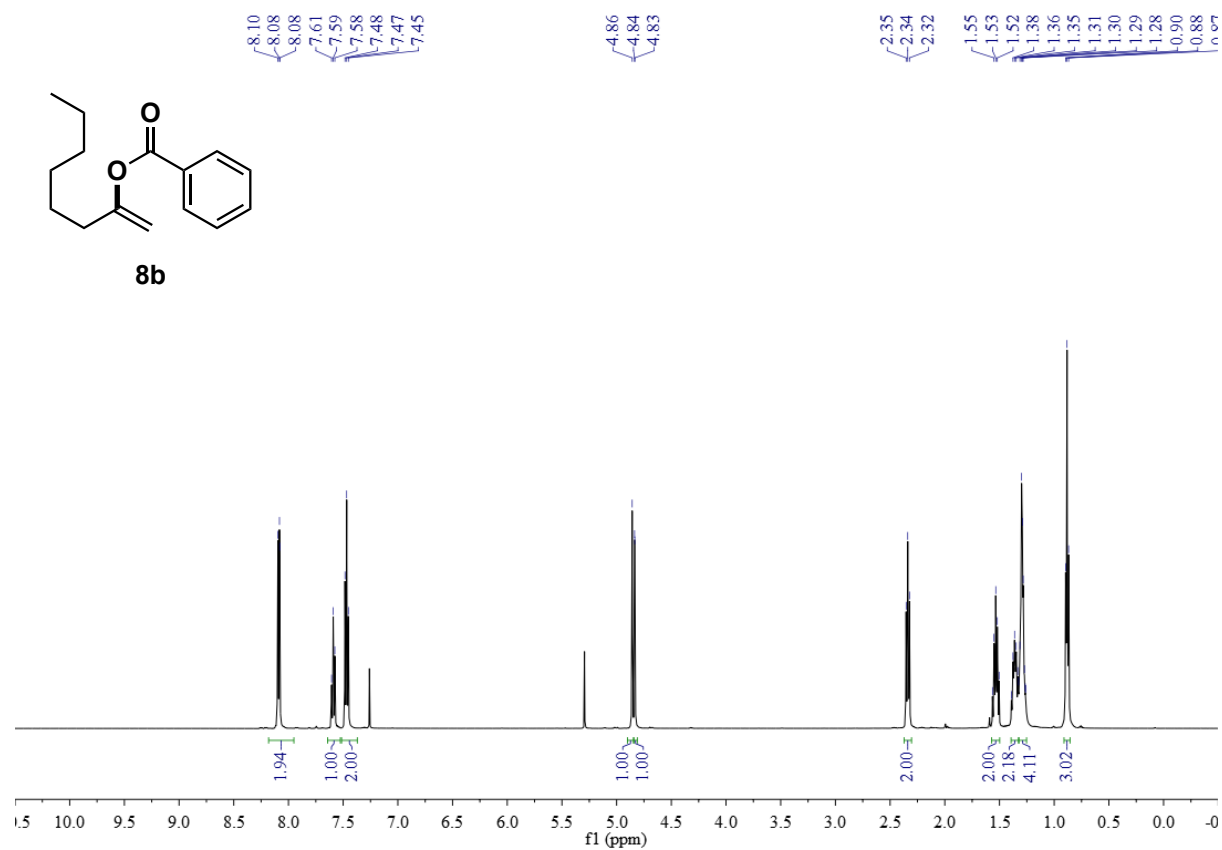

<sup>1</sup>H NMR (500 MHz, CDCl<sub>3</sub>) Spectrum of Compound **8b**.

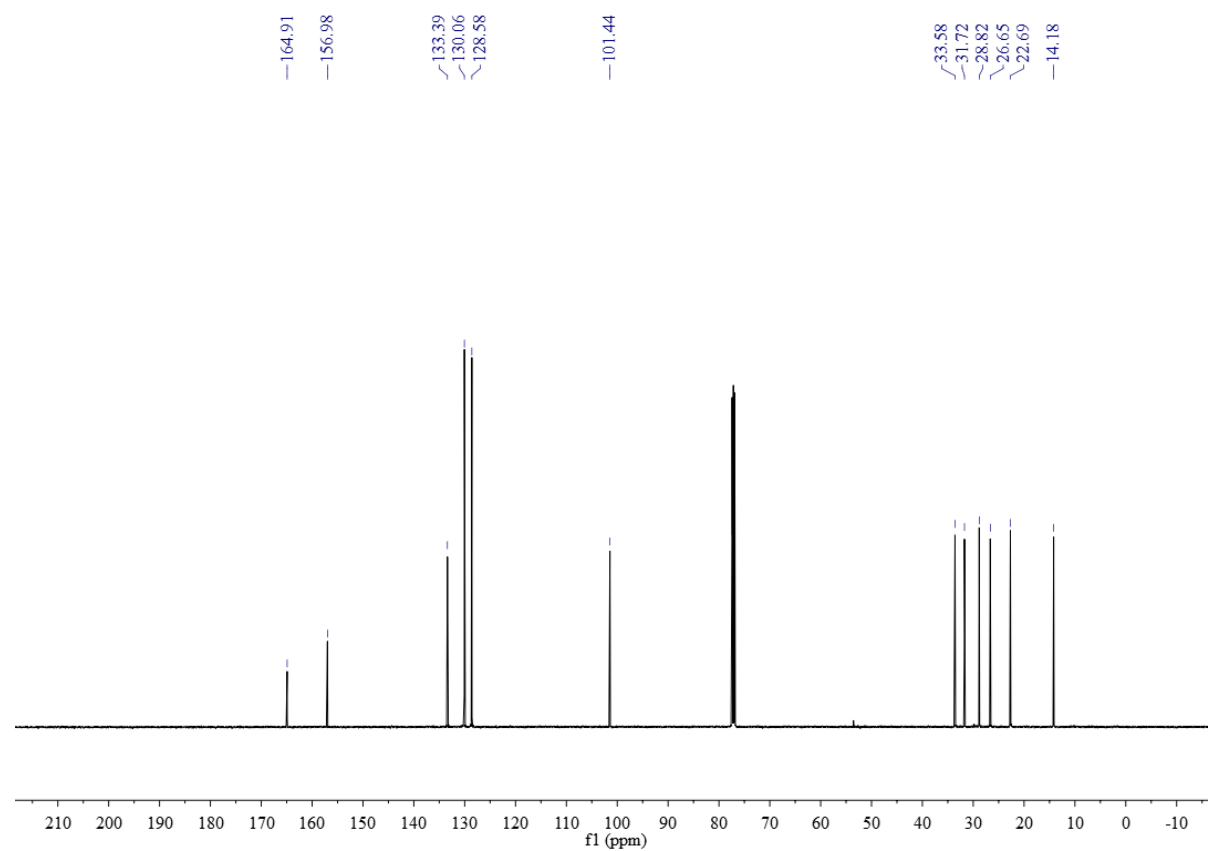

<sup>13</sup>C NMR (126 MHz, CDCl<sub>3</sub>) Spectrum of Compound **8b**.

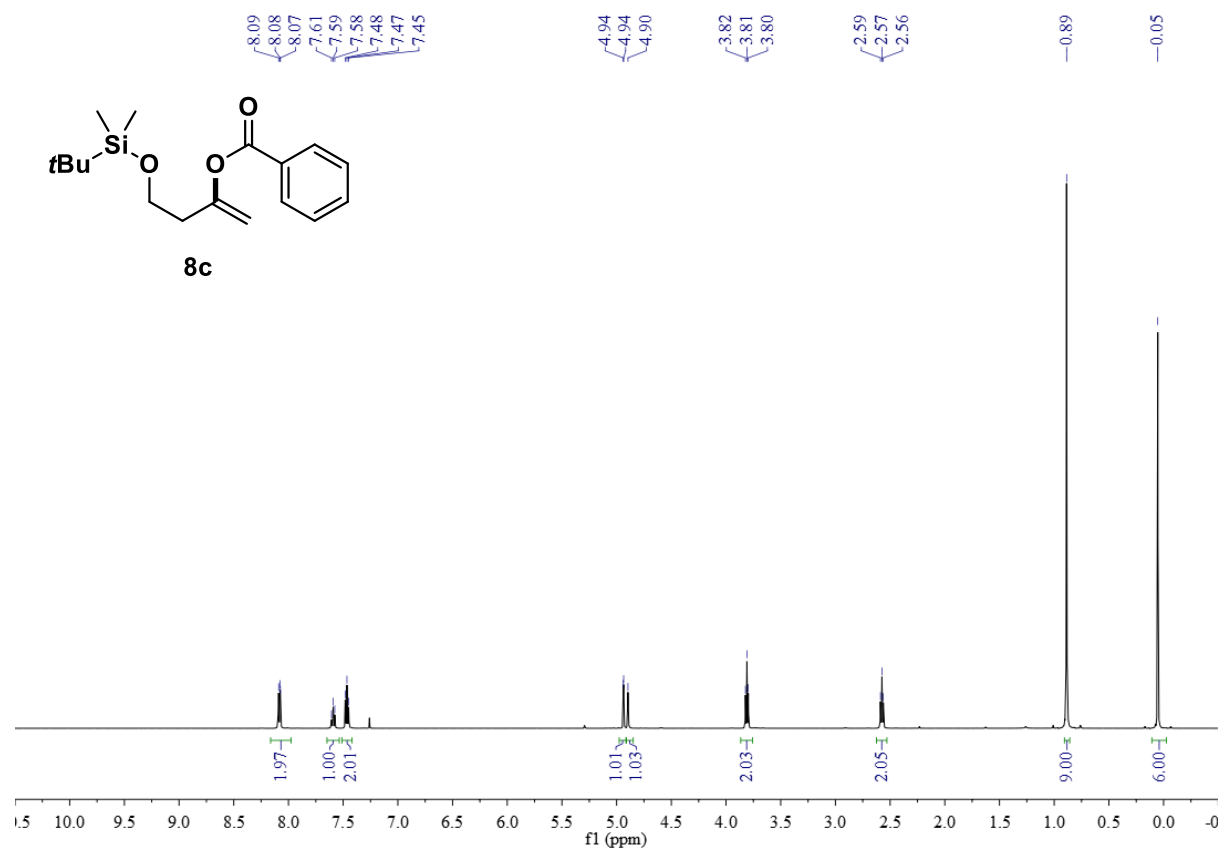

<sup>1</sup>H NMR (500 MHz, CDCl<sub>3</sub>) Spectrum of Compound 8c.

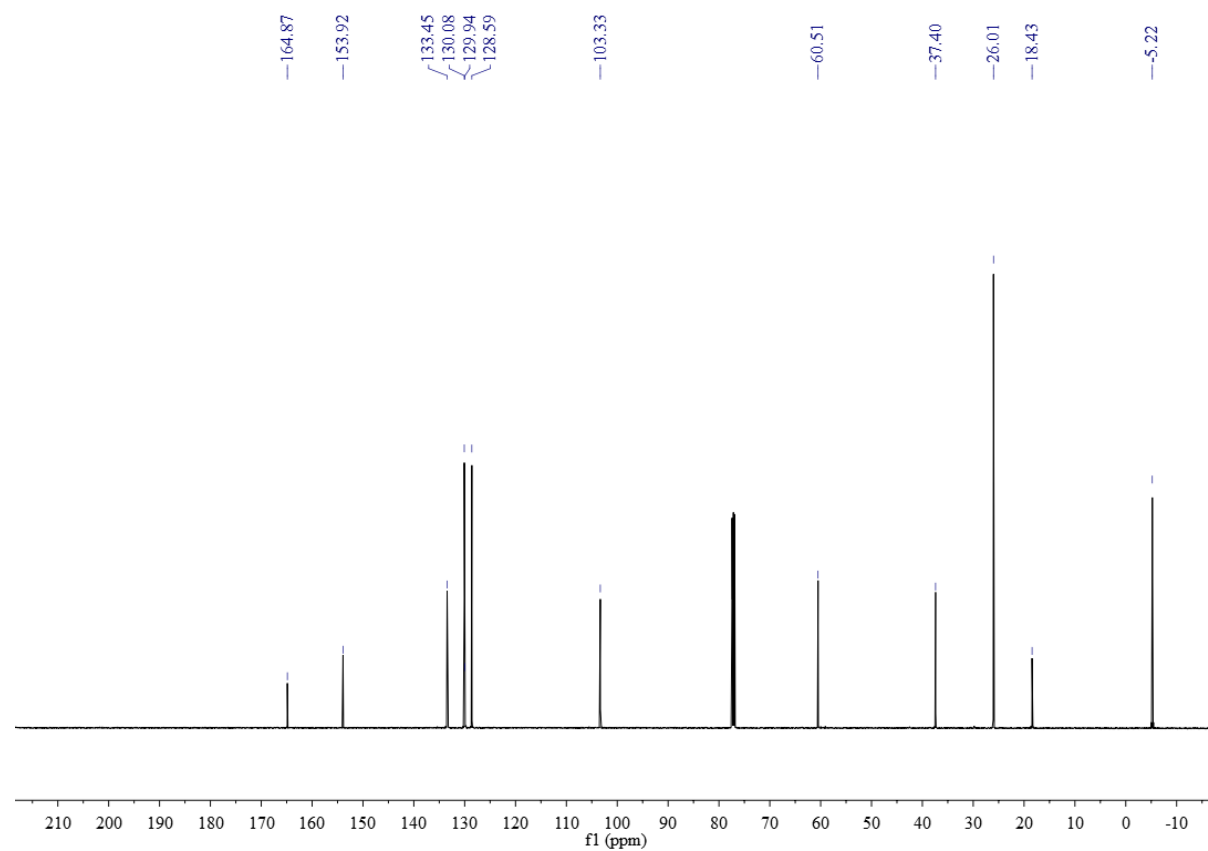

<sup>13</sup>C NMR (126 MHz, CDCl<sub>3</sub>) Spectrum of Compound 8c.

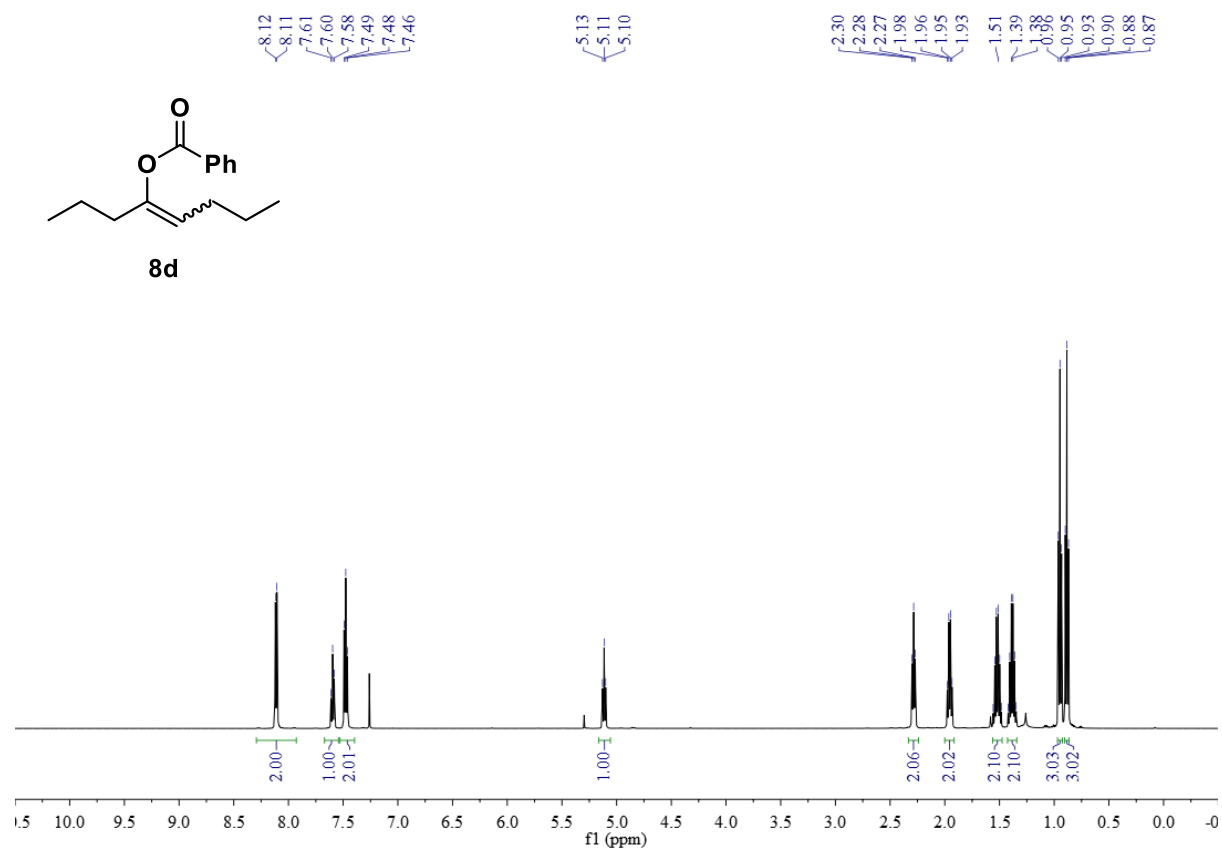

<sup>1</sup>H NMR (500 MHz, CDCl<sub>3</sub>) Spectrum of Compound **8d**.

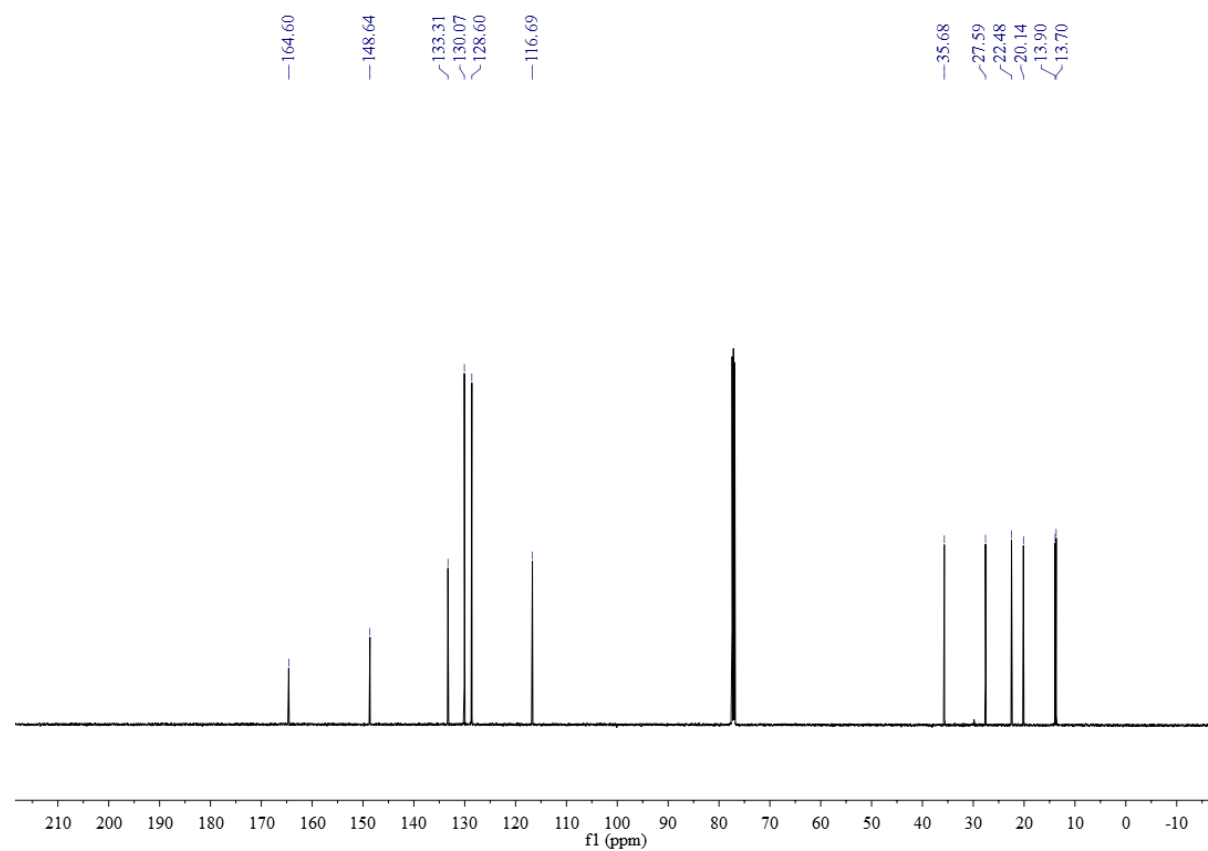

<sup>13</sup>C NMR (126 MHz, CDCl<sub>3</sub>) Spectrum of Compound **8d**.

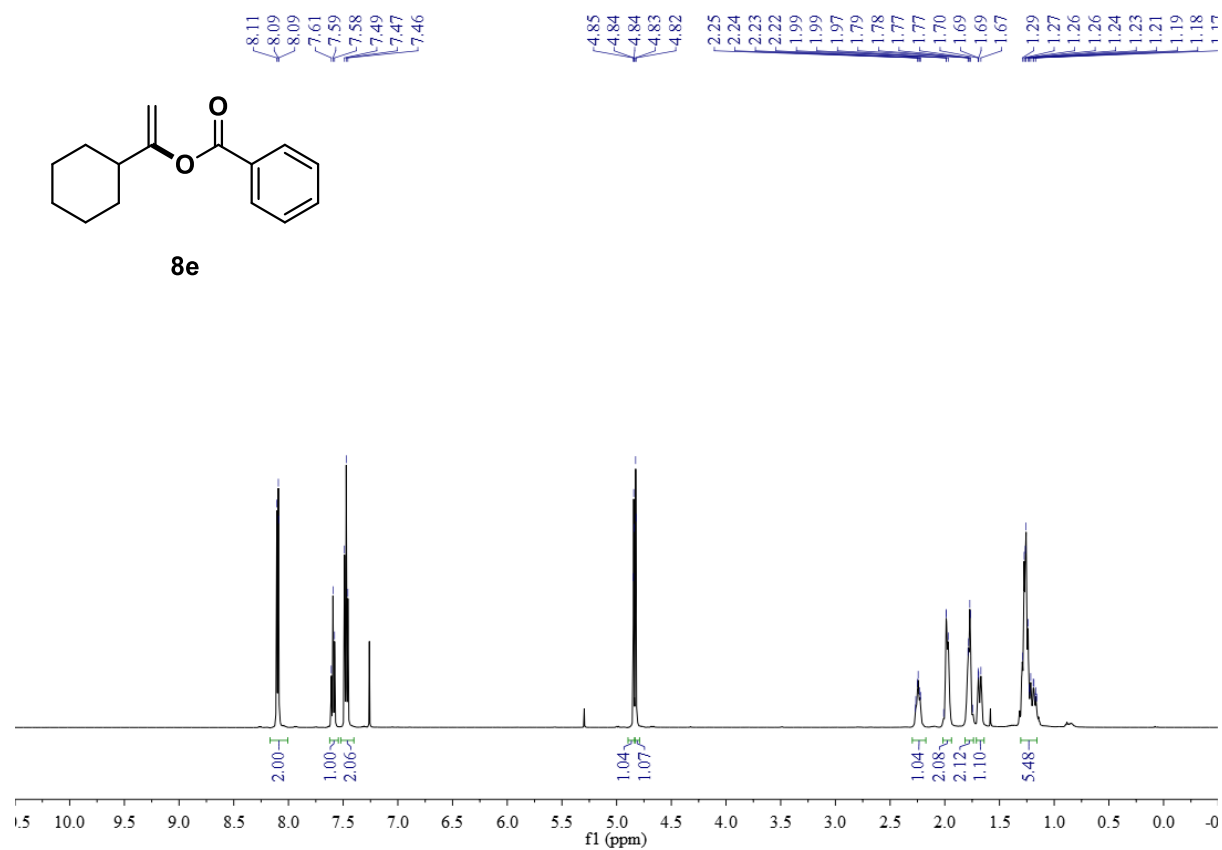

<sup>1</sup>H NMR (500 MHz, CDCl<sub>3</sub>) Spectrum of Compound **8e**.

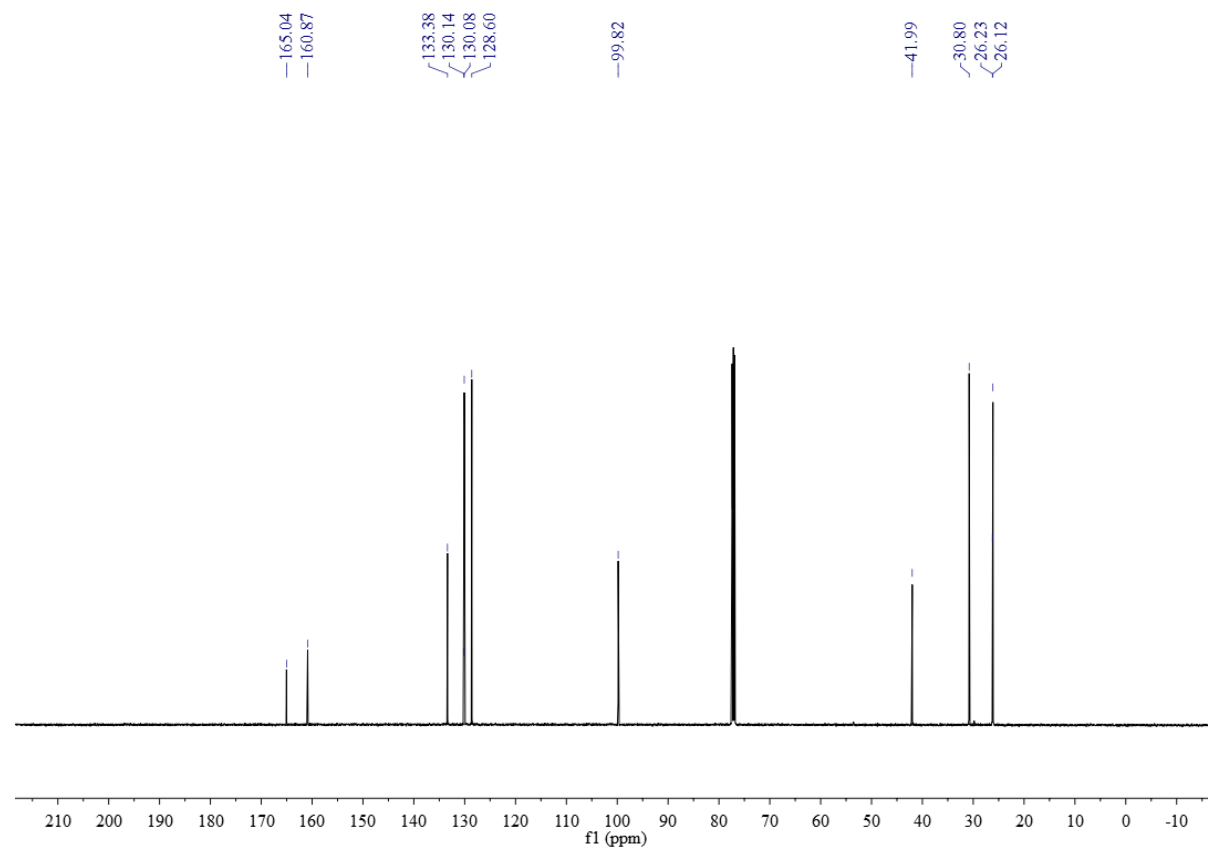

<sup>13</sup>C NMR (126 MHz, CDCl<sub>3</sub>) Spectrum of Compound **8e**.

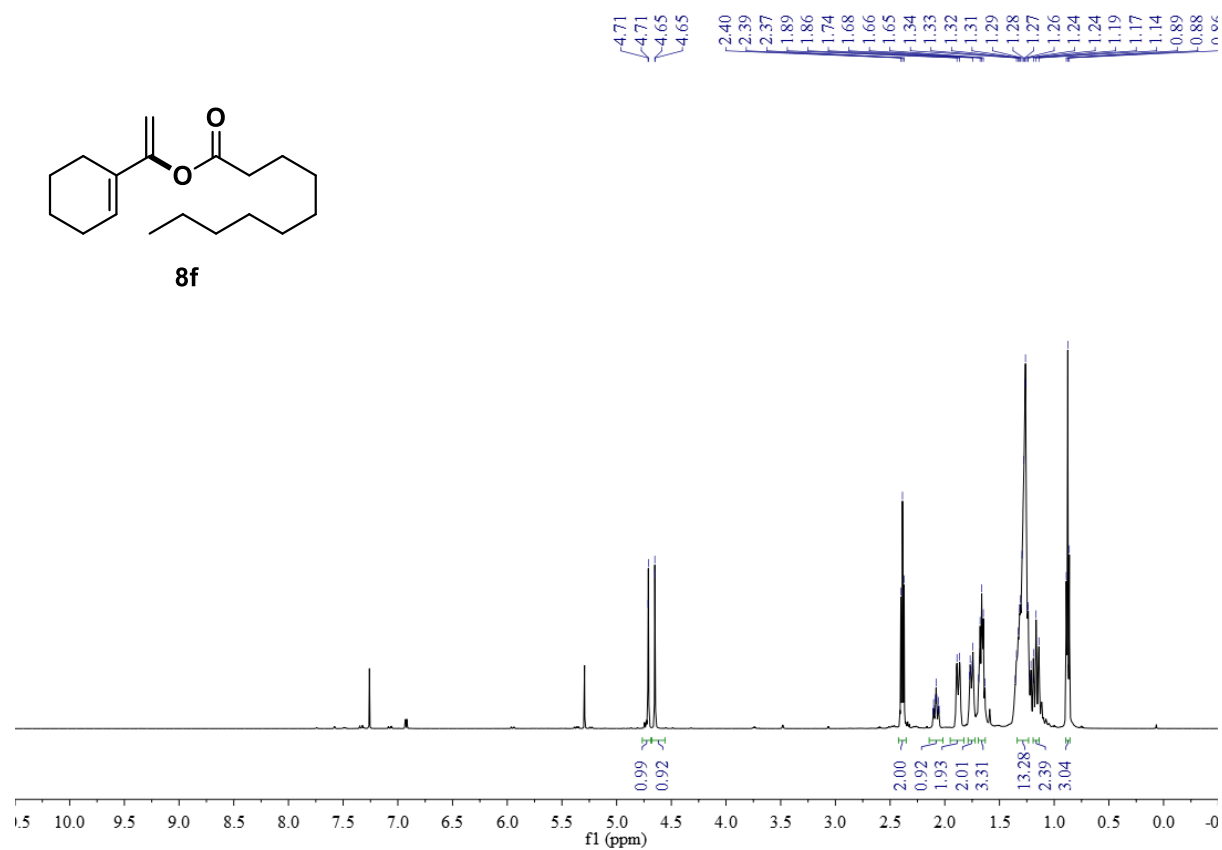

<sup>1</sup>H NMR (500 MHz, CDCl<sub>3</sub>) Spectrum of Compound **8f**.

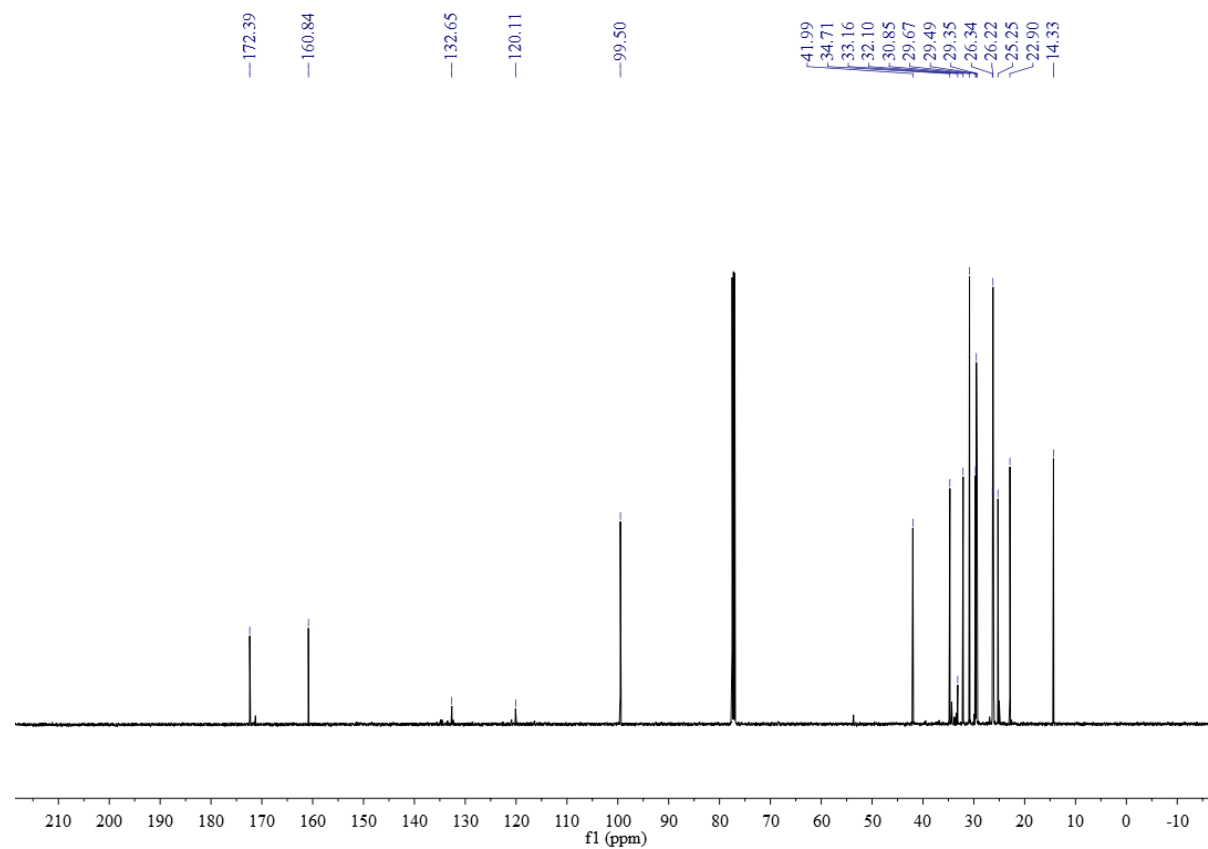

<sup>13</sup>C NMR (126 MHz, CDCl<sub>3</sub>) Spectrum of Compound **8f**.

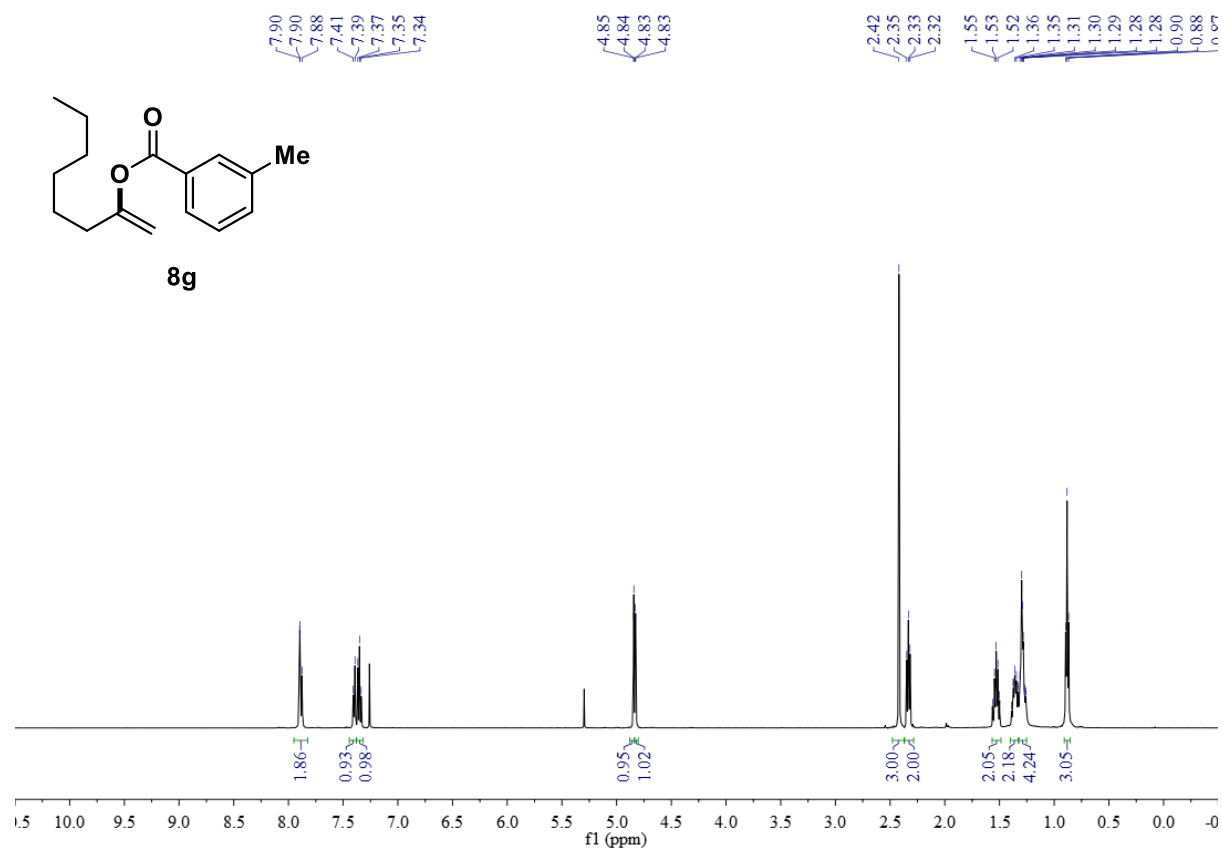

<sup>1</sup>H NMR (500 MHz, CDCl<sub>3</sub>) Spectrum of Compound **8g**.

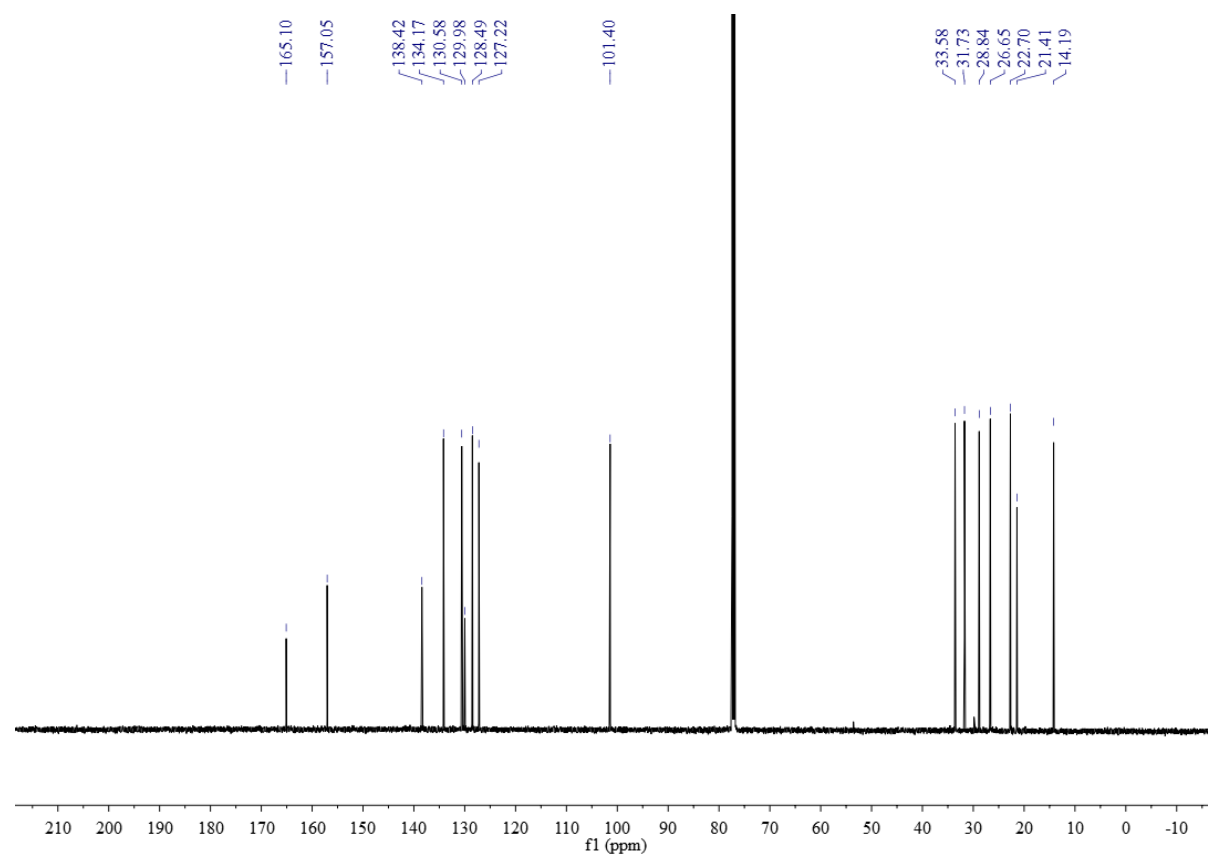

<sup>13</sup>C NMR (126 MHz, CDCl<sub>3</sub>) Spectrum of Compound **8g**.

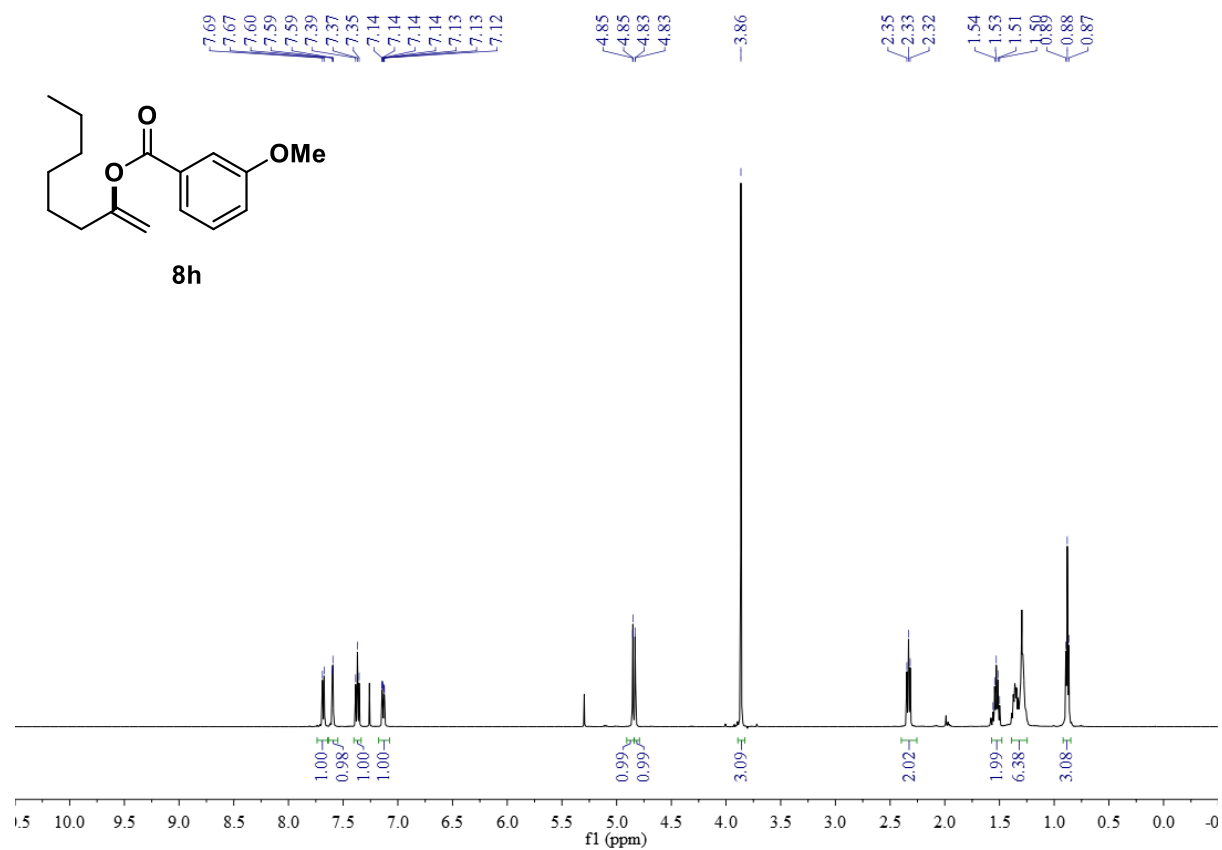

**1H NMR (500 MHz, CDCl<sub>3</sub>) Spectrum of Compound 8h.**

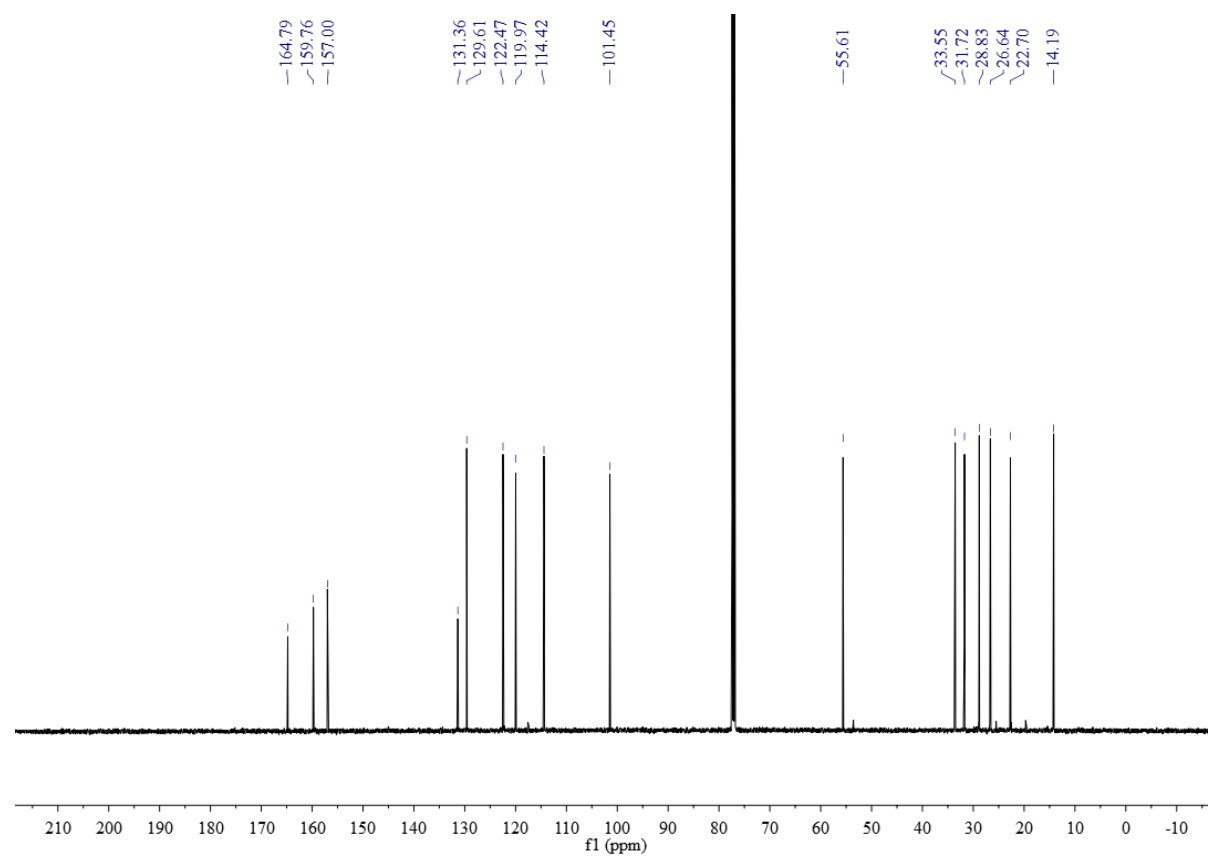

**13C NMR (126 MHz, CDCl<sub>3</sub>) Spectrum of Compound 8h.**



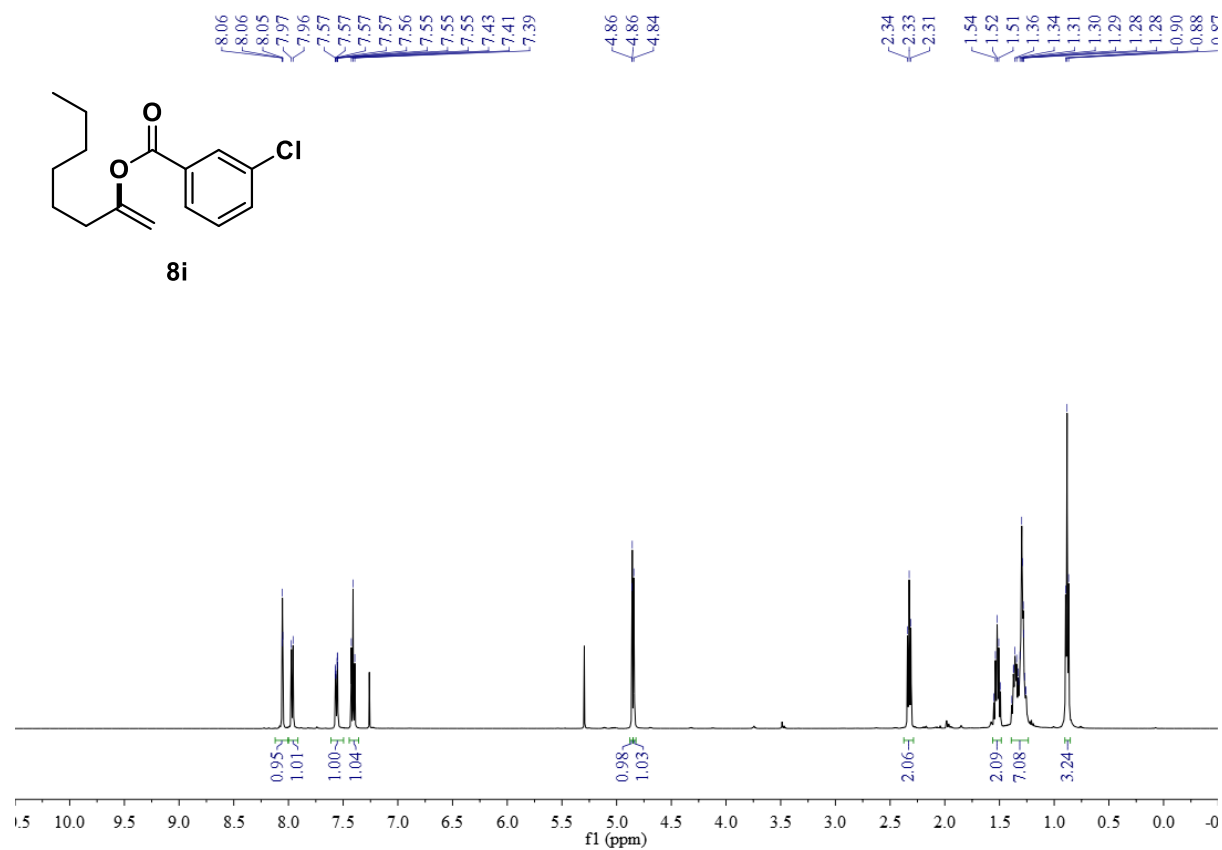

<sup>1</sup>H NMR (500 MHz, CDCl<sub>3</sub>) Spectrum of Compound **8i**.

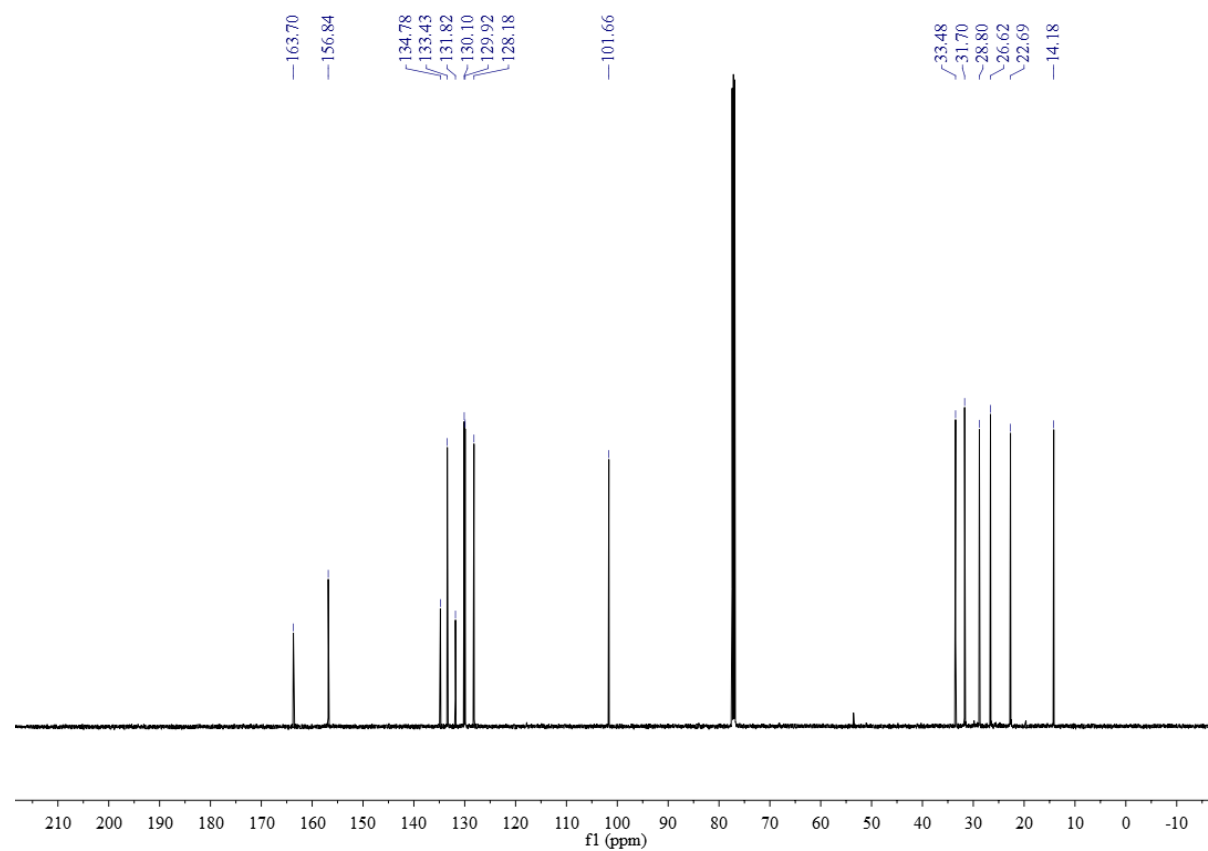

<sup>13</sup>C NMR (126 MHz, CDCl<sub>3</sub>) Spectrum of Compound **8i**.

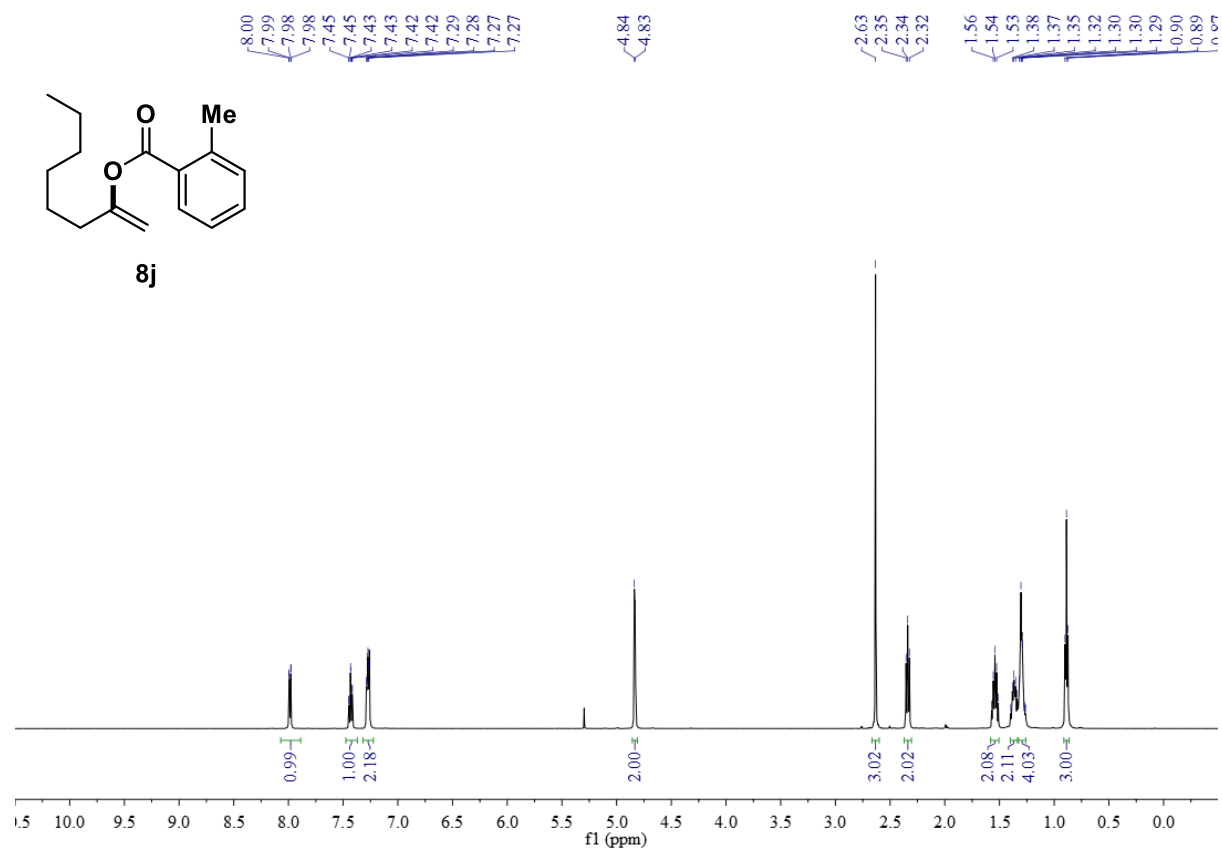

<sup>1</sup>H NMR (500 MHz, CDCl<sub>3</sub>) Spectrum of Compound **8j**.

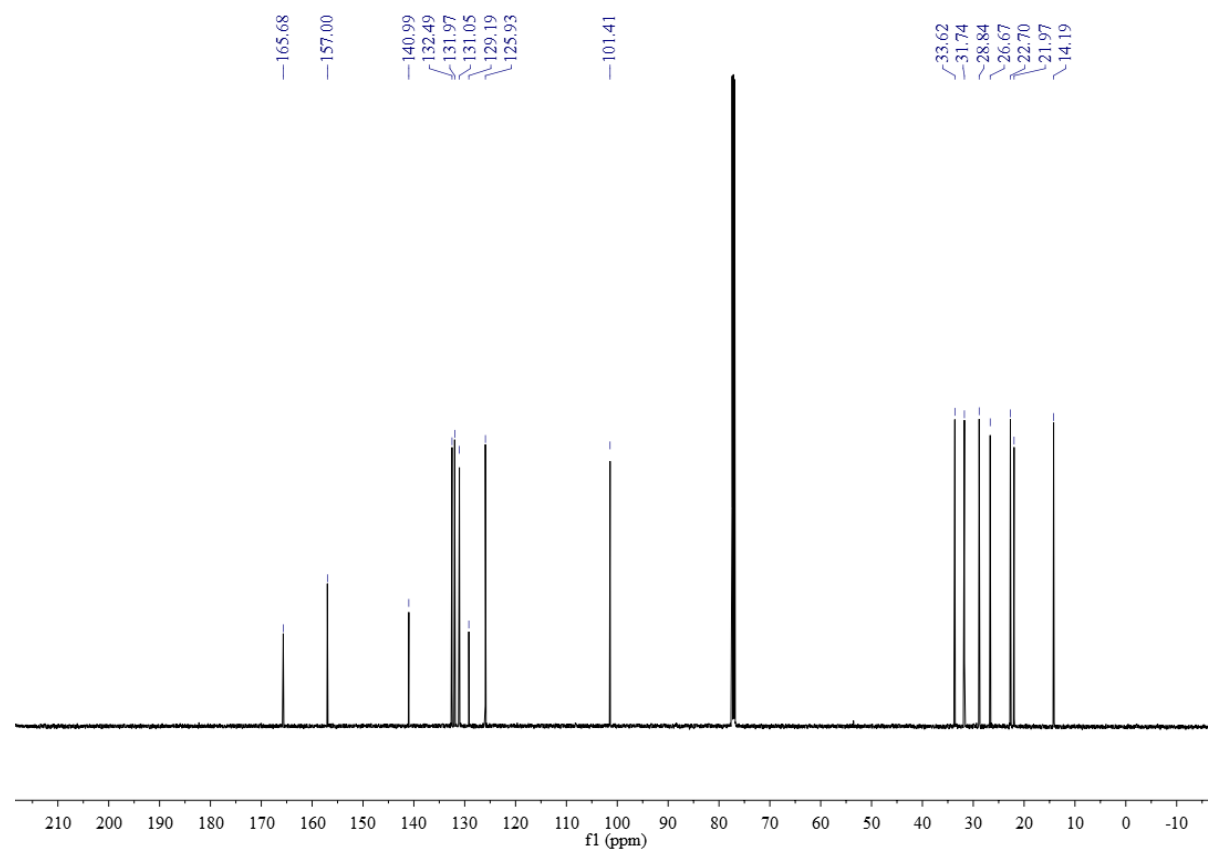

<sup>13</sup>C NMR (126 MHz, CDCl<sub>3</sub>) Spectrum of Compound **8j**.

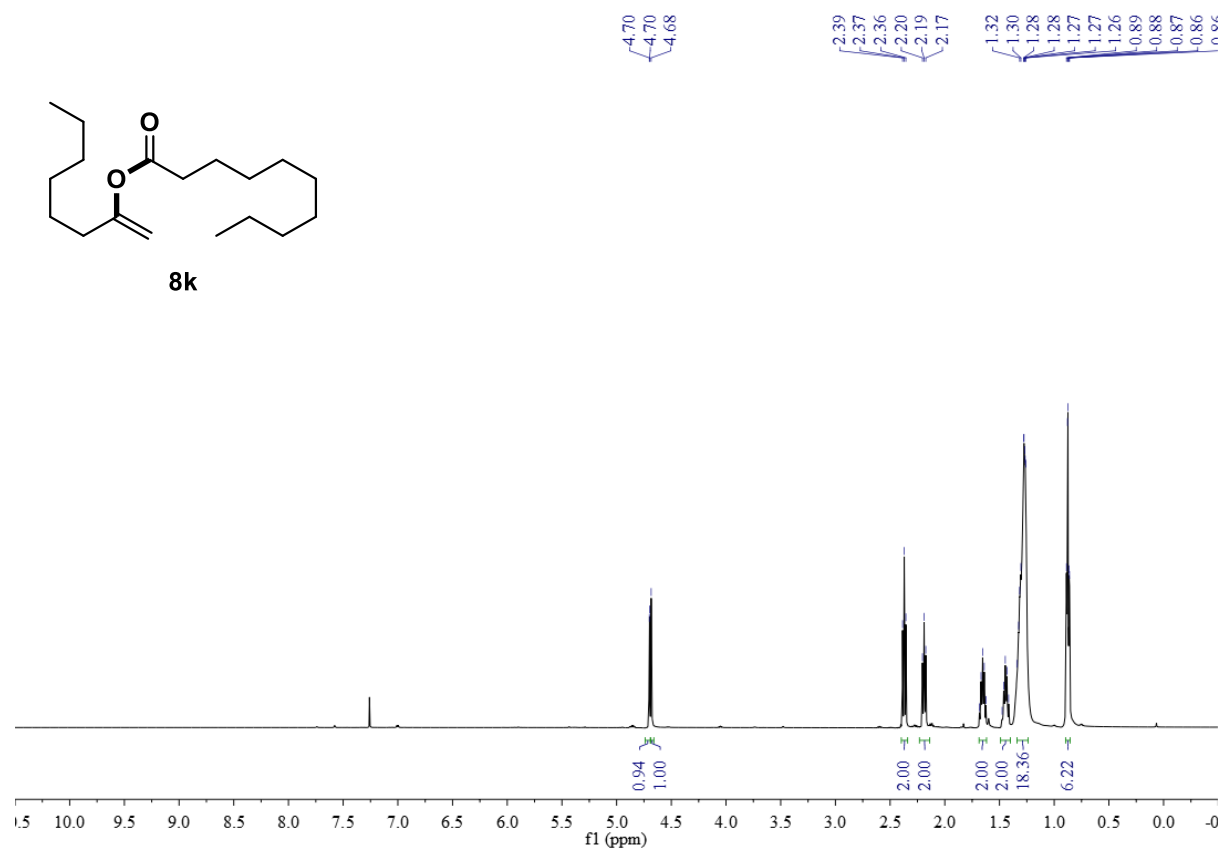

<sup>1</sup>H NMR (500 MHz, CDCl<sub>3</sub>) Spectrum of Compound **8k**.

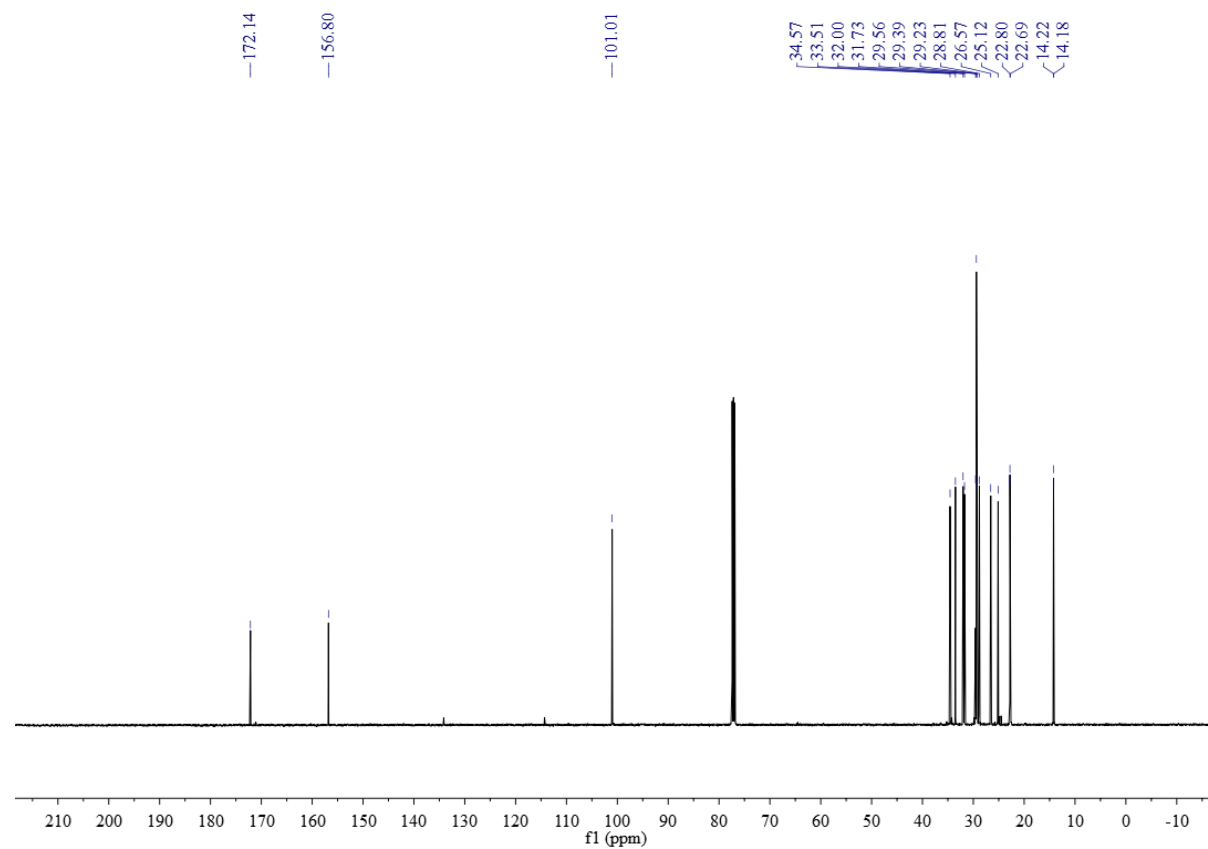

<sup>13</sup>C NMR (126 MHz, CDCl<sub>3</sub>) Spectrum of Compound **8k**.

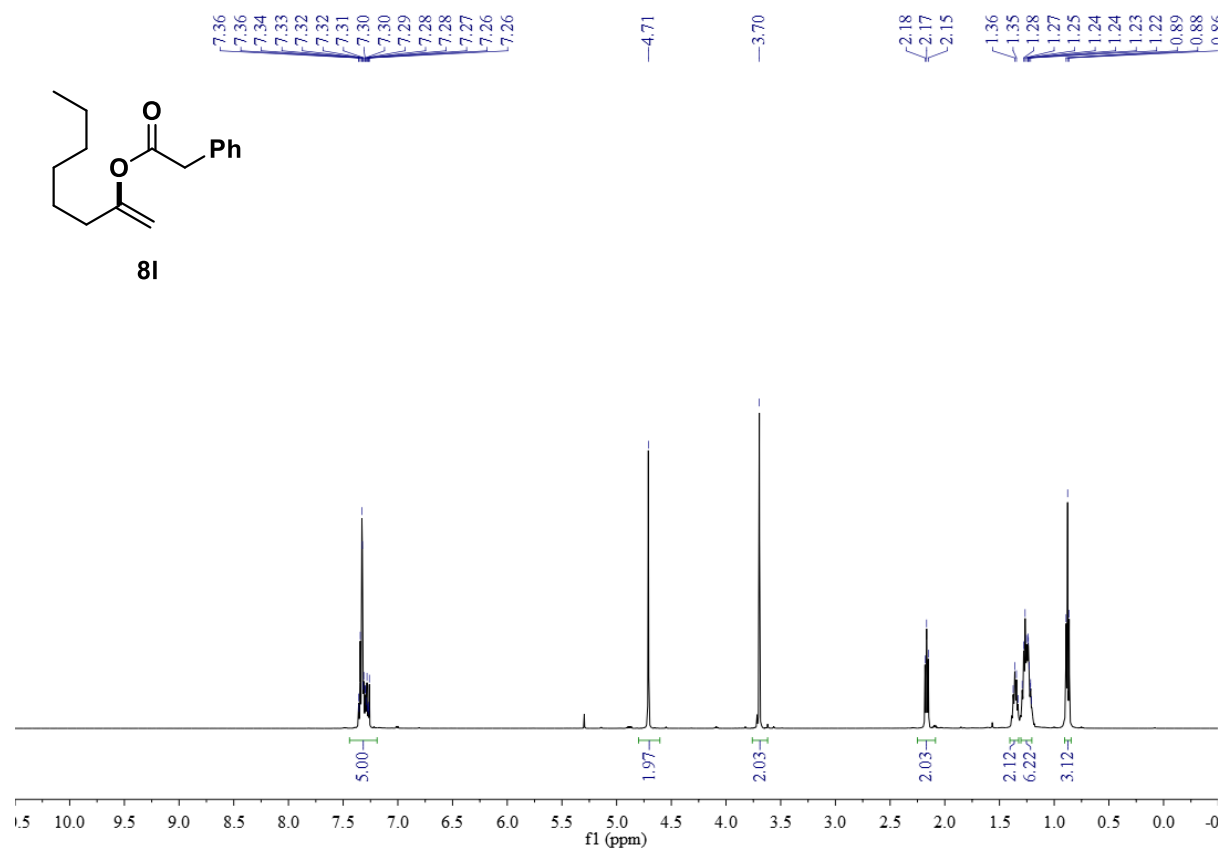

<sup>1</sup>H NMR (500 MHz, CDCl<sub>3</sub>) Spectrum of Compound **8I**.

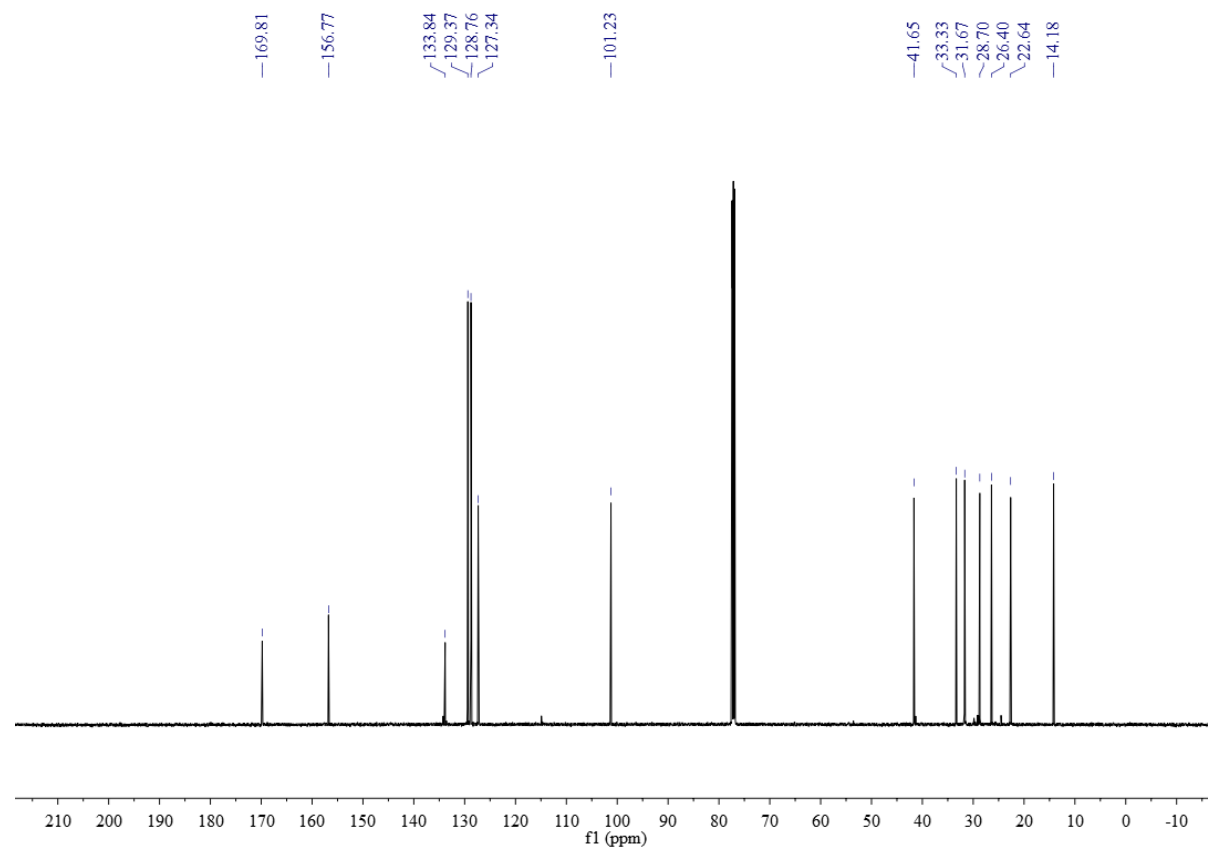

<sup>13</sup>C NMR (126 MHz, CDCl<sub>3</sub>) Spectrum of Compound **8I**.

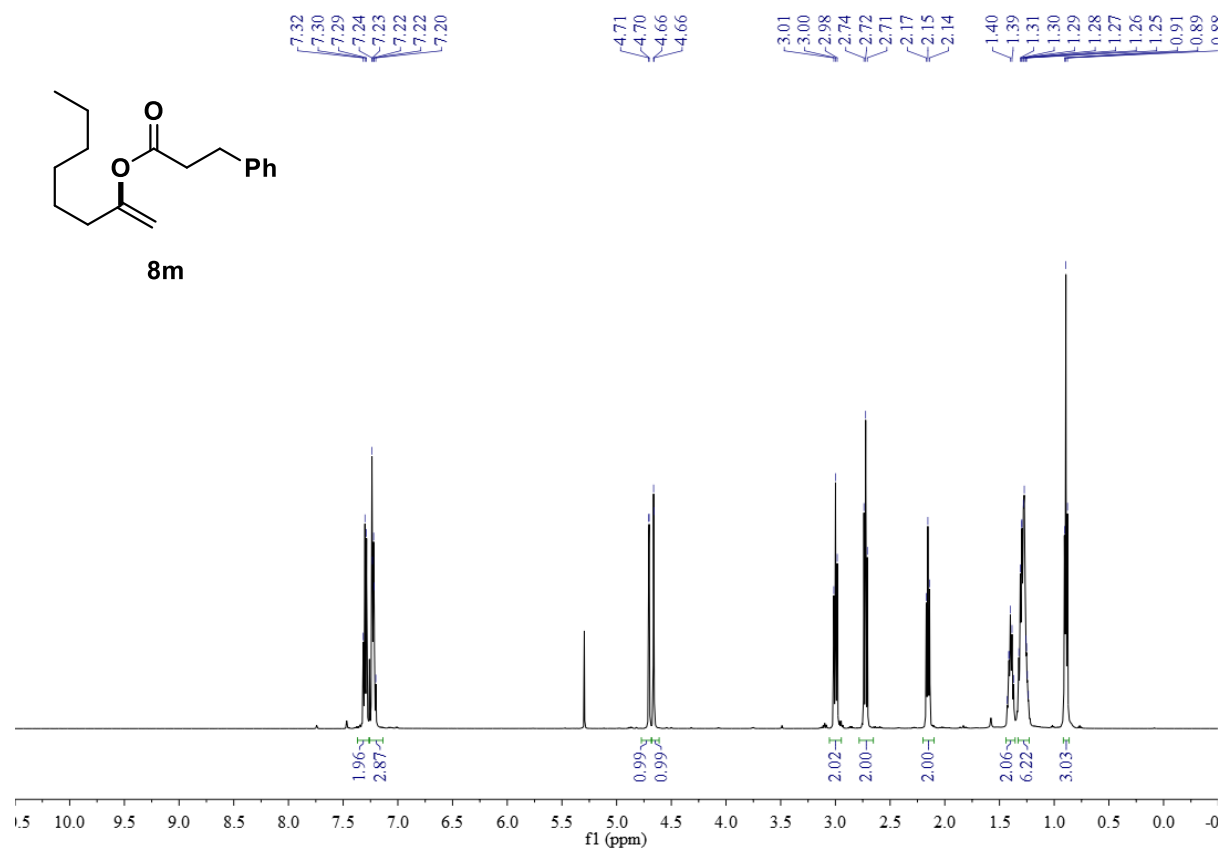

<sup>1</sup>H NMR (500 MHz, CDCl<sub>3</sub>) Spectrum of Compound **8m**.

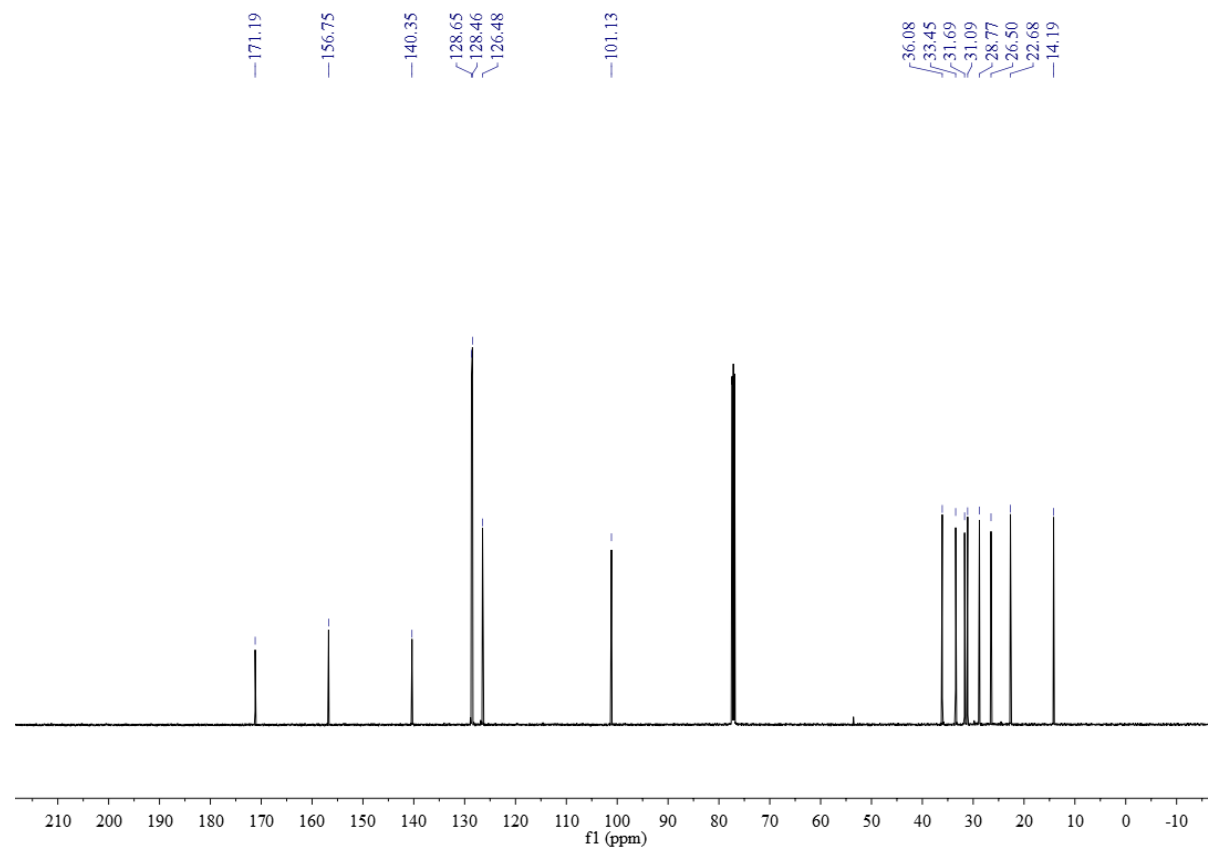

<sup>13</sup>C NMR (126 MHz, CDCl<sub>3</sub>) Spectrum of Compound **8m**.

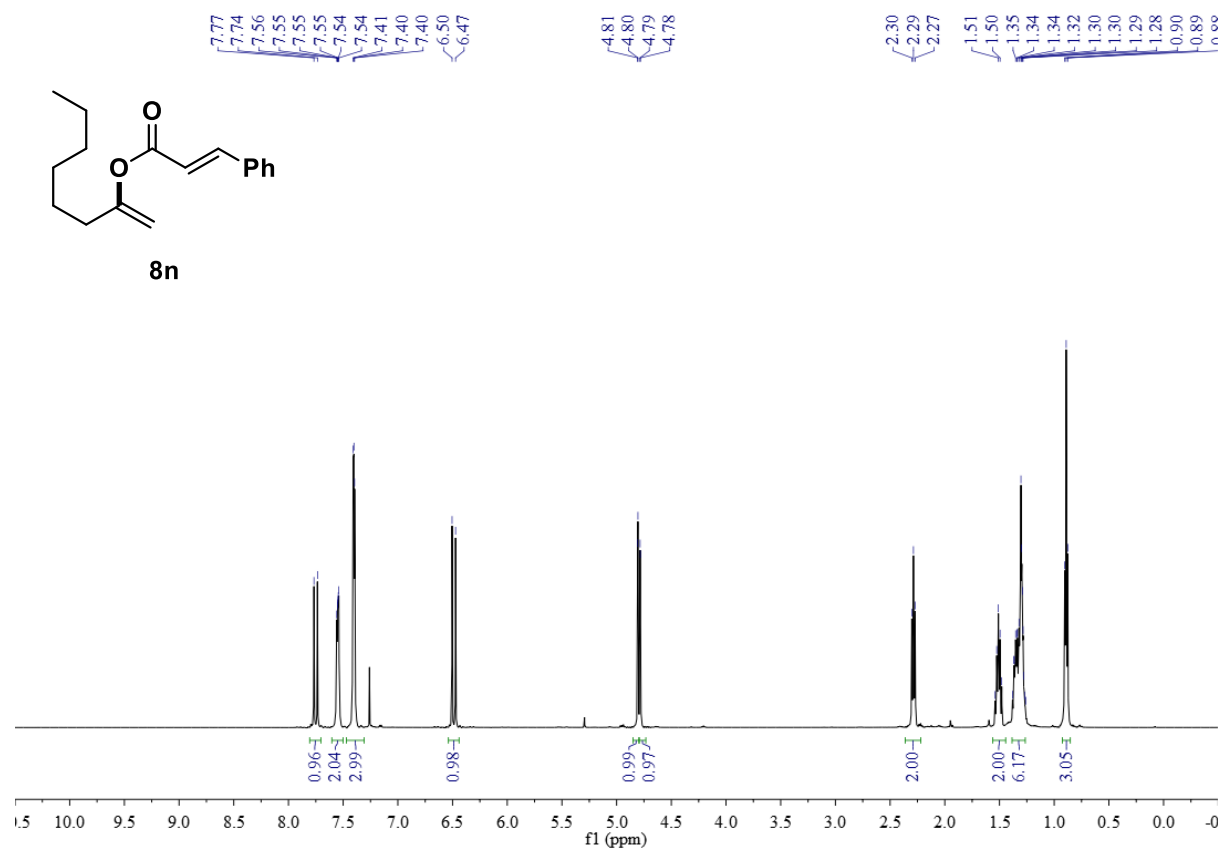

<sup>1</sup>H NMR (500 MHz, CDCl<sub>3</sub>) Spectrum of Compound **8n**.

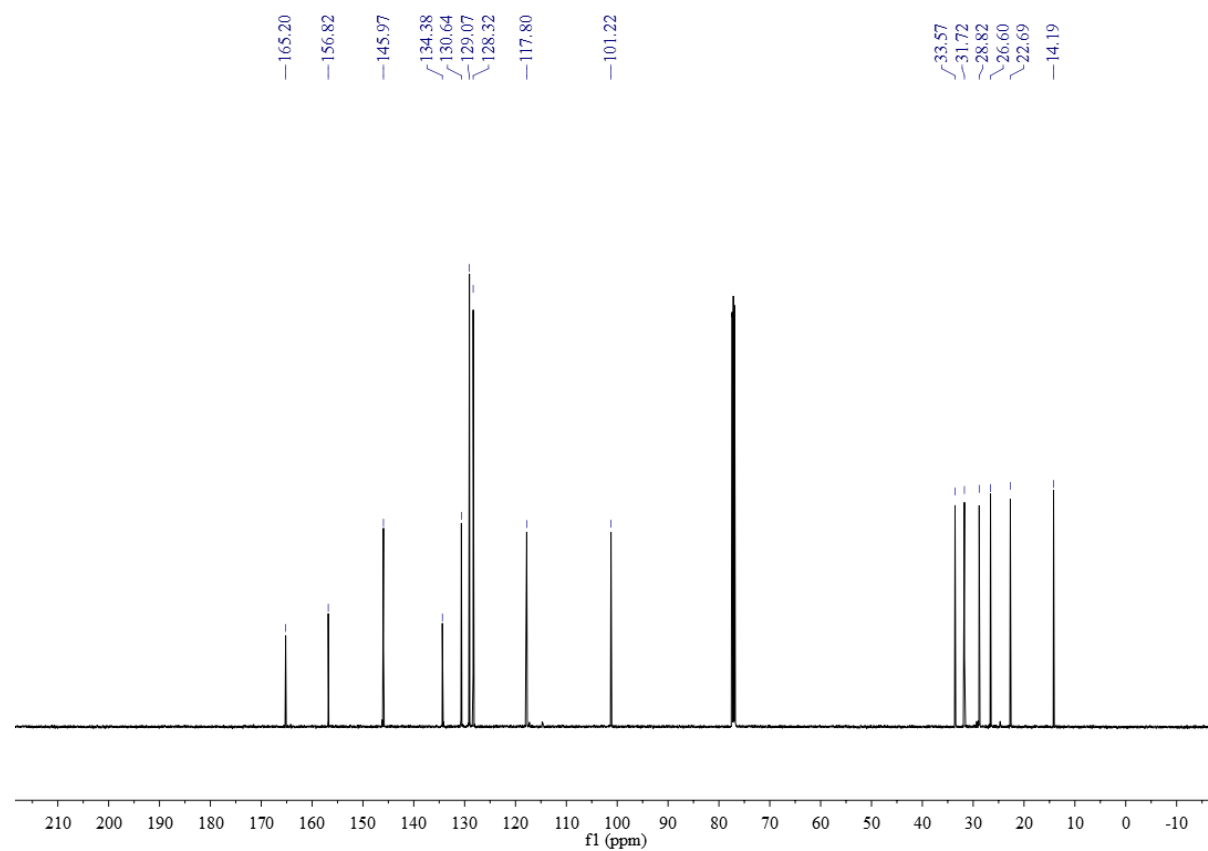

<sup>13</sup>C NMR (126 MHz, CDCl<sub>3</sub>) Spectrum of Compound **8n**.

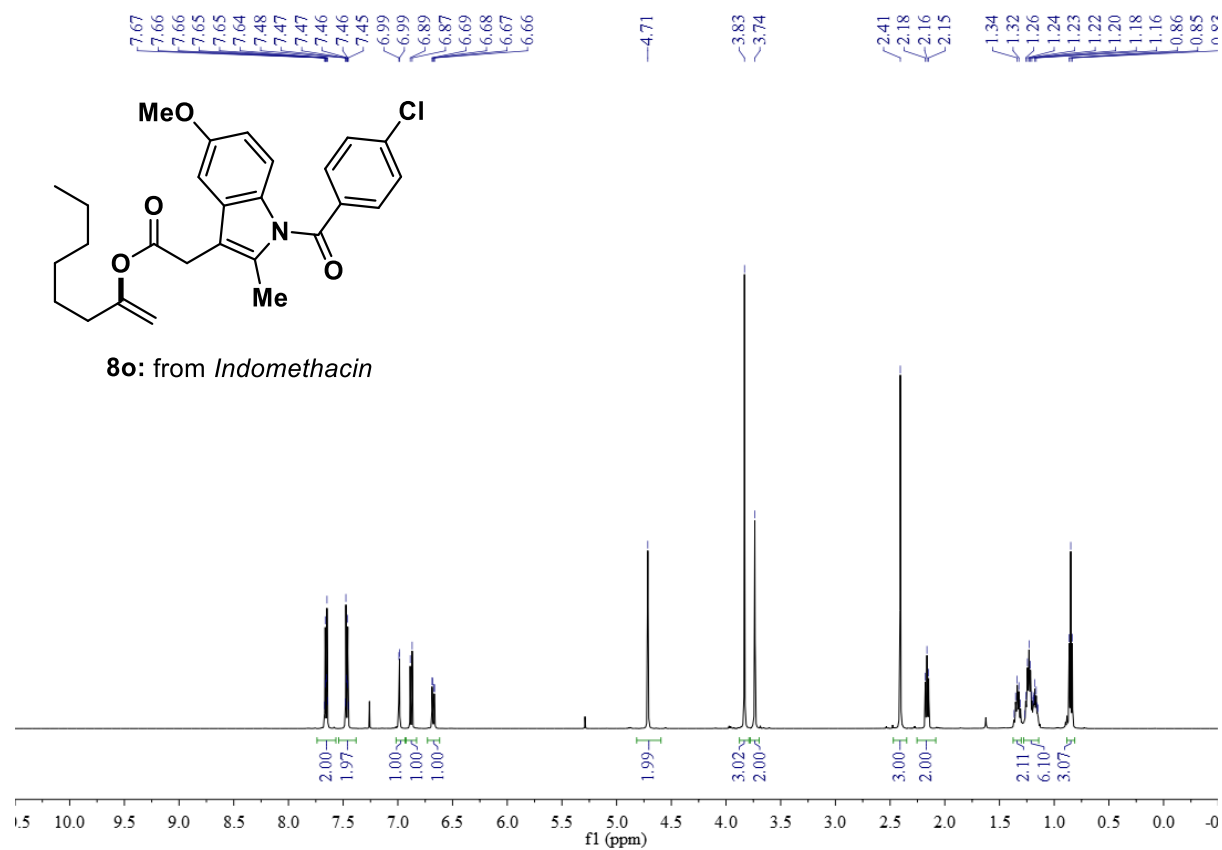

<sup>1</sup>H NMR (500 MHz, CDCl<sub>3</sub>) Spectrum of Compound **8o**.

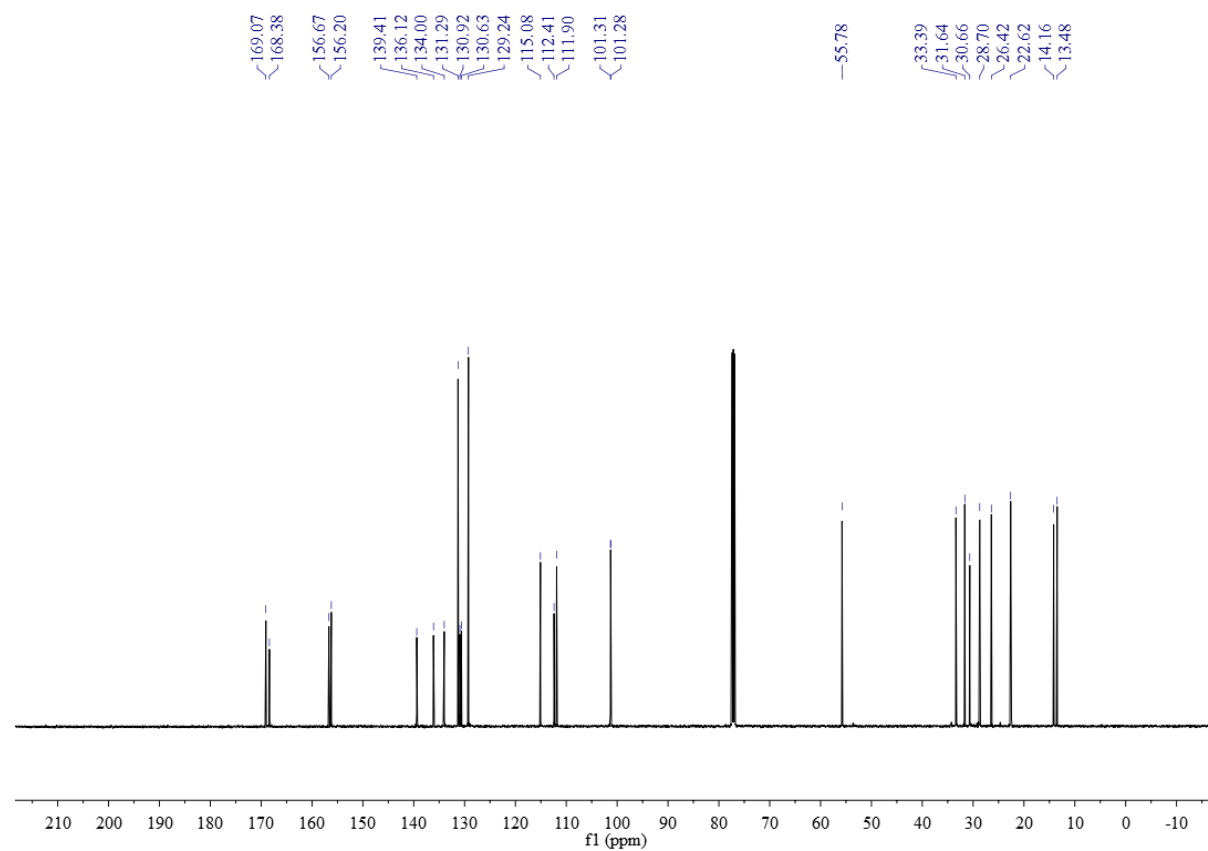

<sup>13</sup>C NMR (126 MHz, CDCl<sub>3</sub>) Spectrum of Compound **8o**.

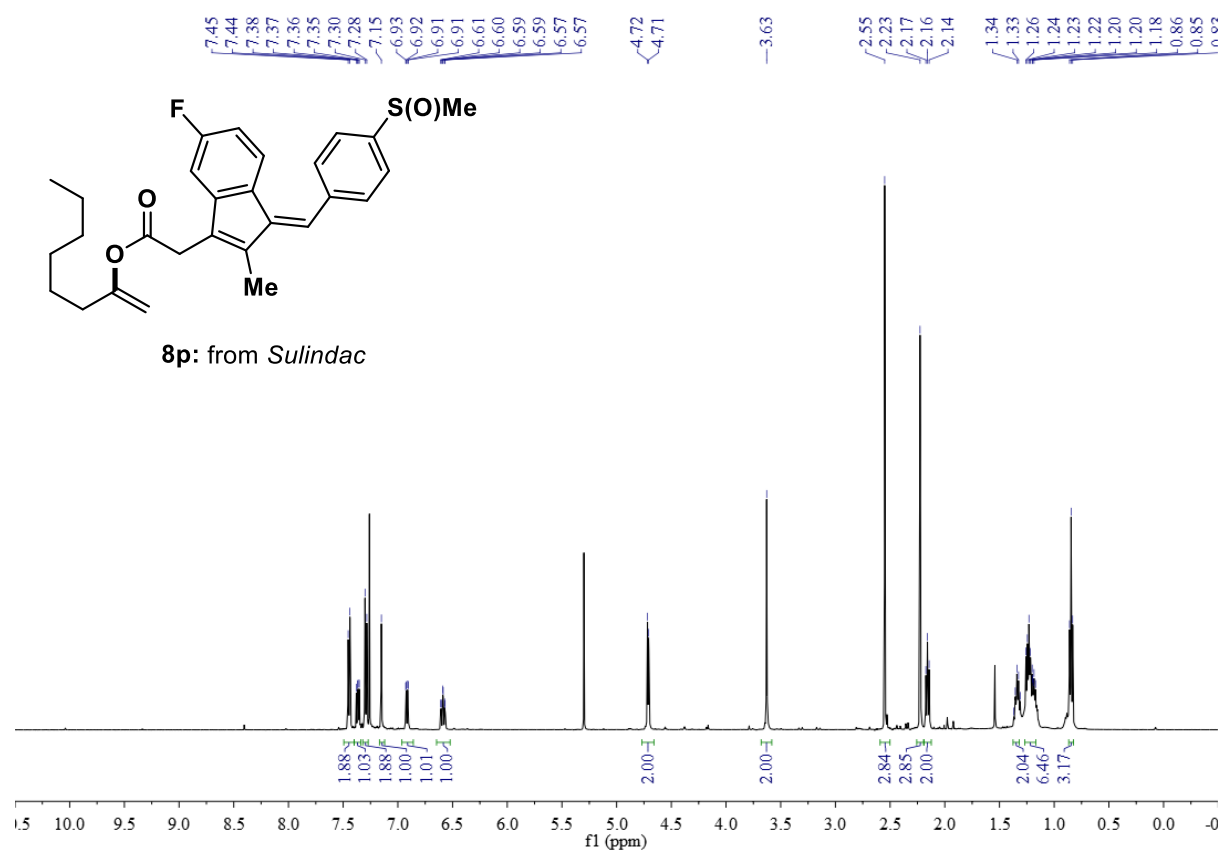

<sup>1</sup>H NMR (500 MHz, CDCl<sub>3</sub>) Spectrum of Compound **8p**.

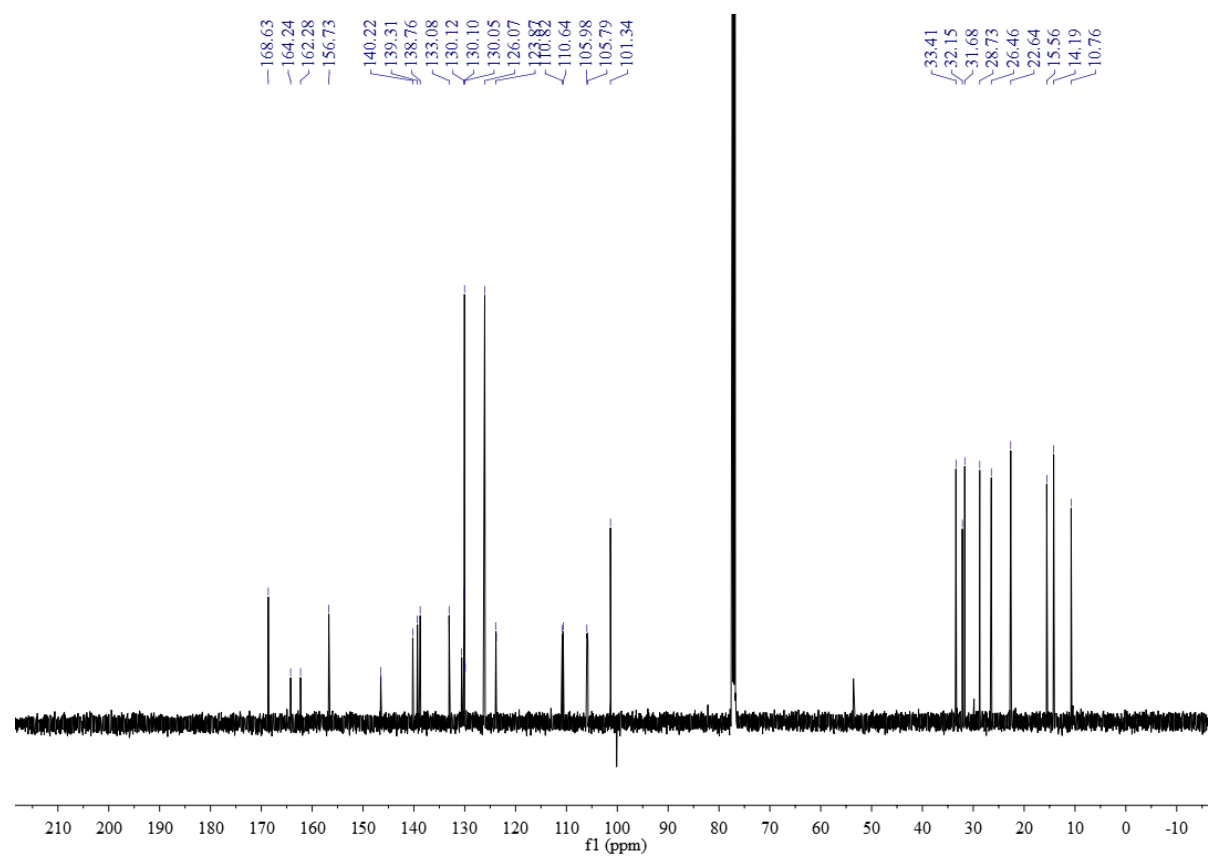

<sup>13</sup>C NMR (126 MHz, CDCl<sub>3</sub>) Spectrum of Compound **8p**.



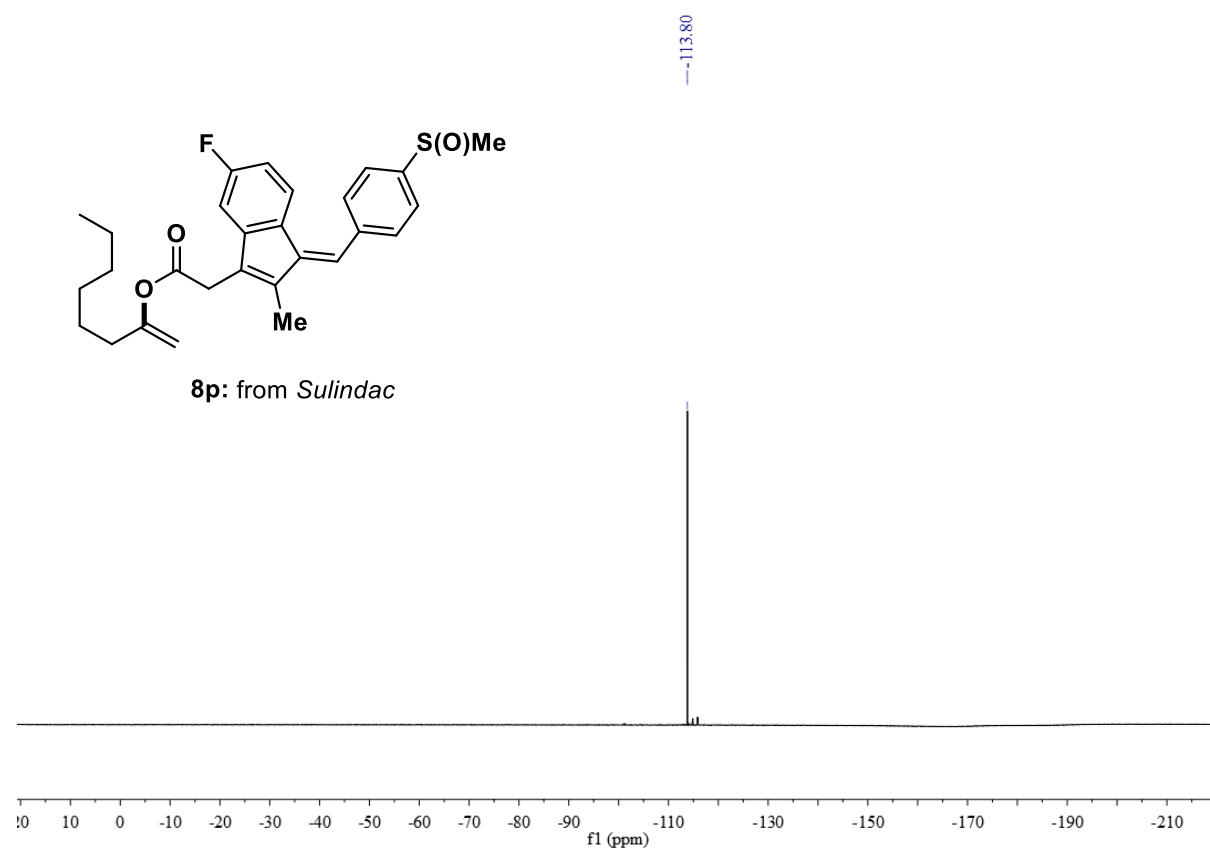

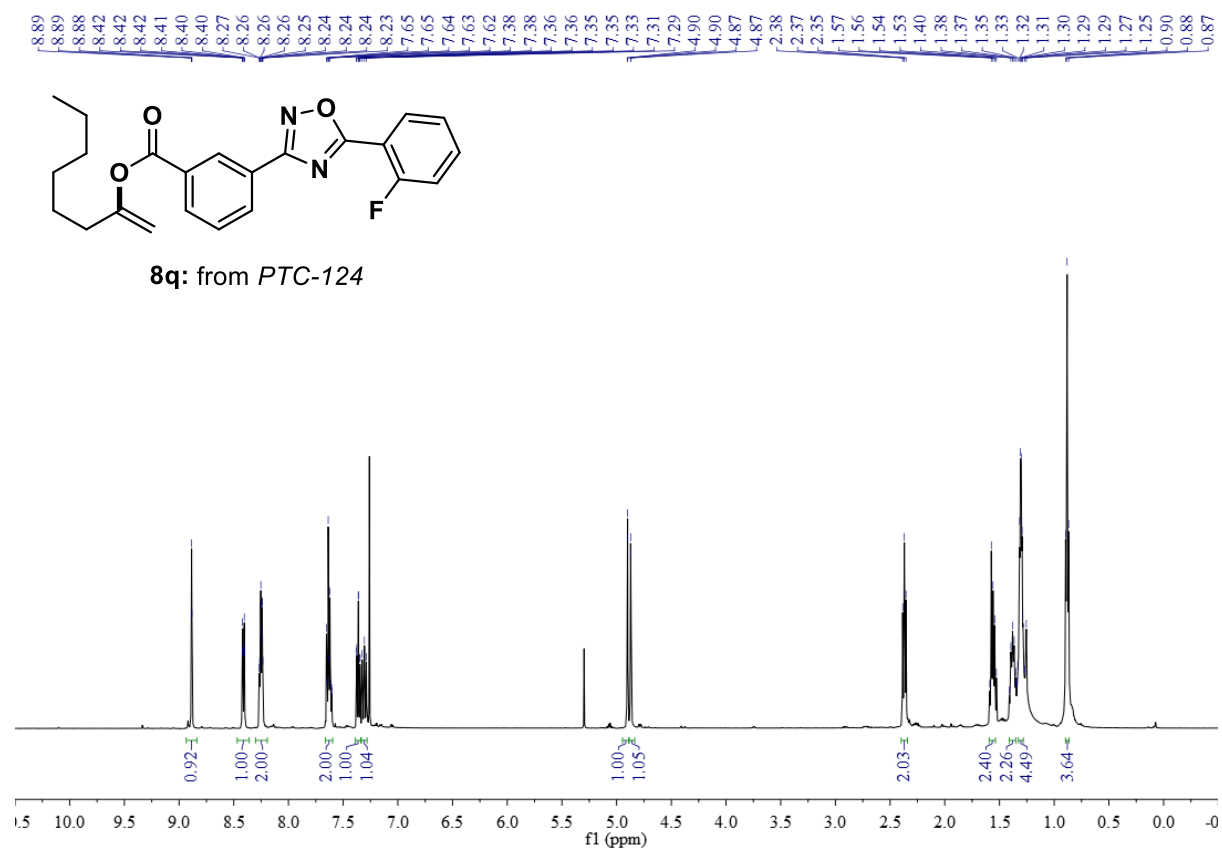

<sup>1</sup>H NMR (500 MHz, CDCl<sub>3</sub>) Spectrum of Compound **8q**.

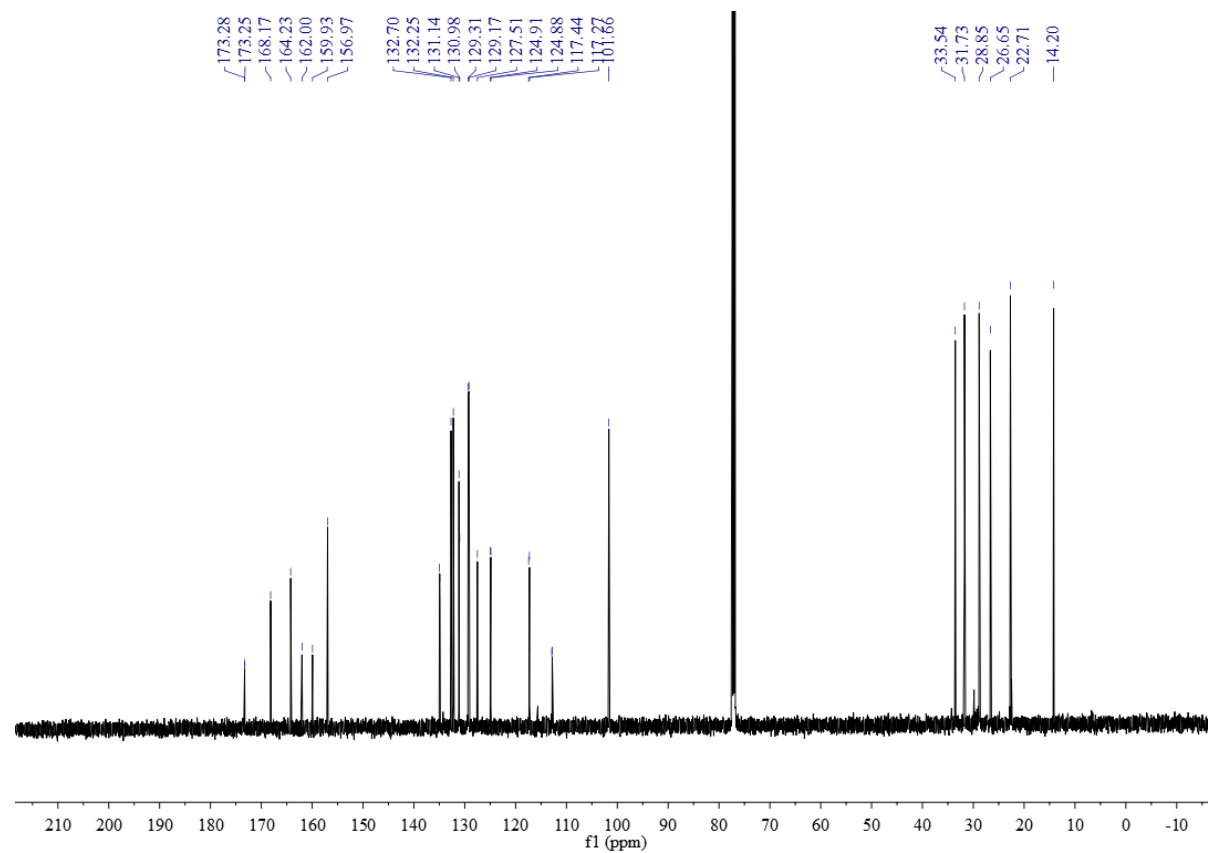

<sup>13</sup>C NMR (126 MHz, CDCl<sub>3</sub>) Spectrum of Compound **8q**.

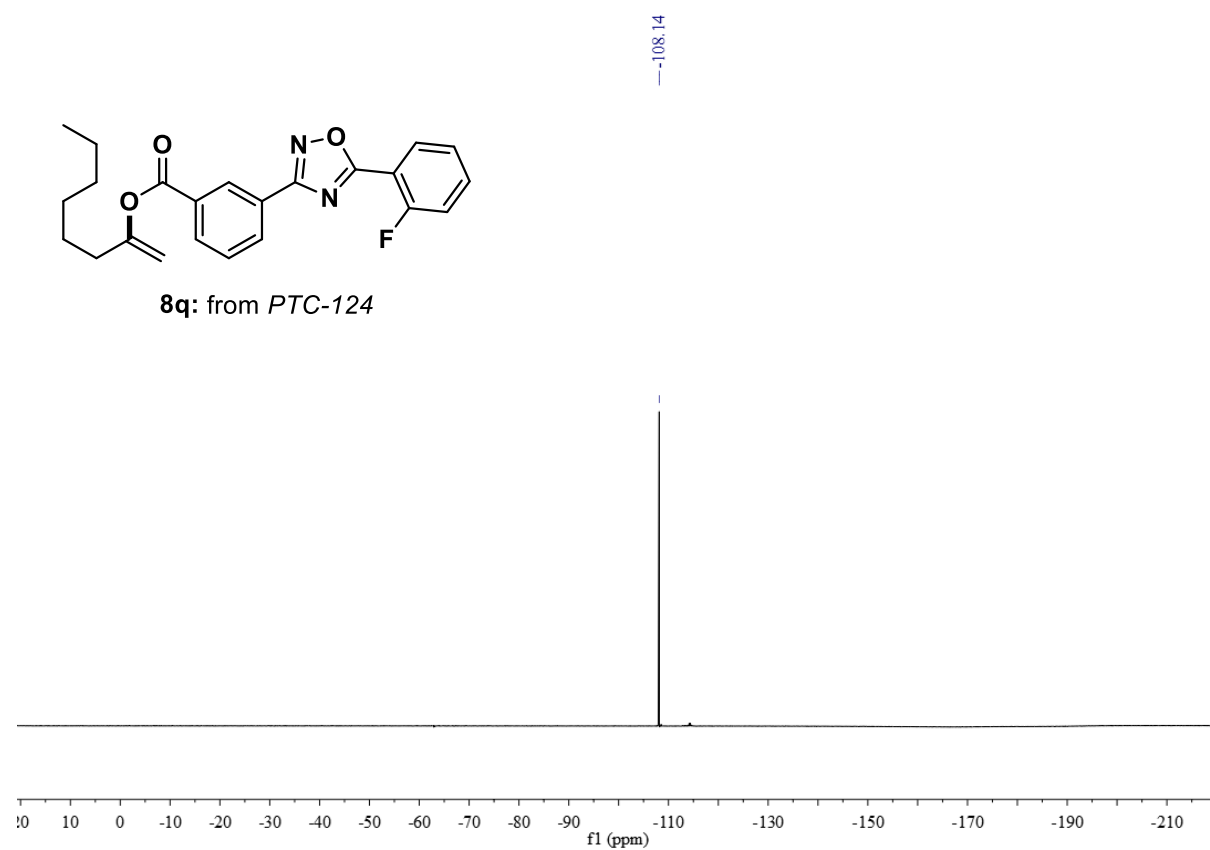

<sup>19</sup>F NMR (471 MHz, CDCl<sub>3</sub>) Spectrum of Compound **8q**.

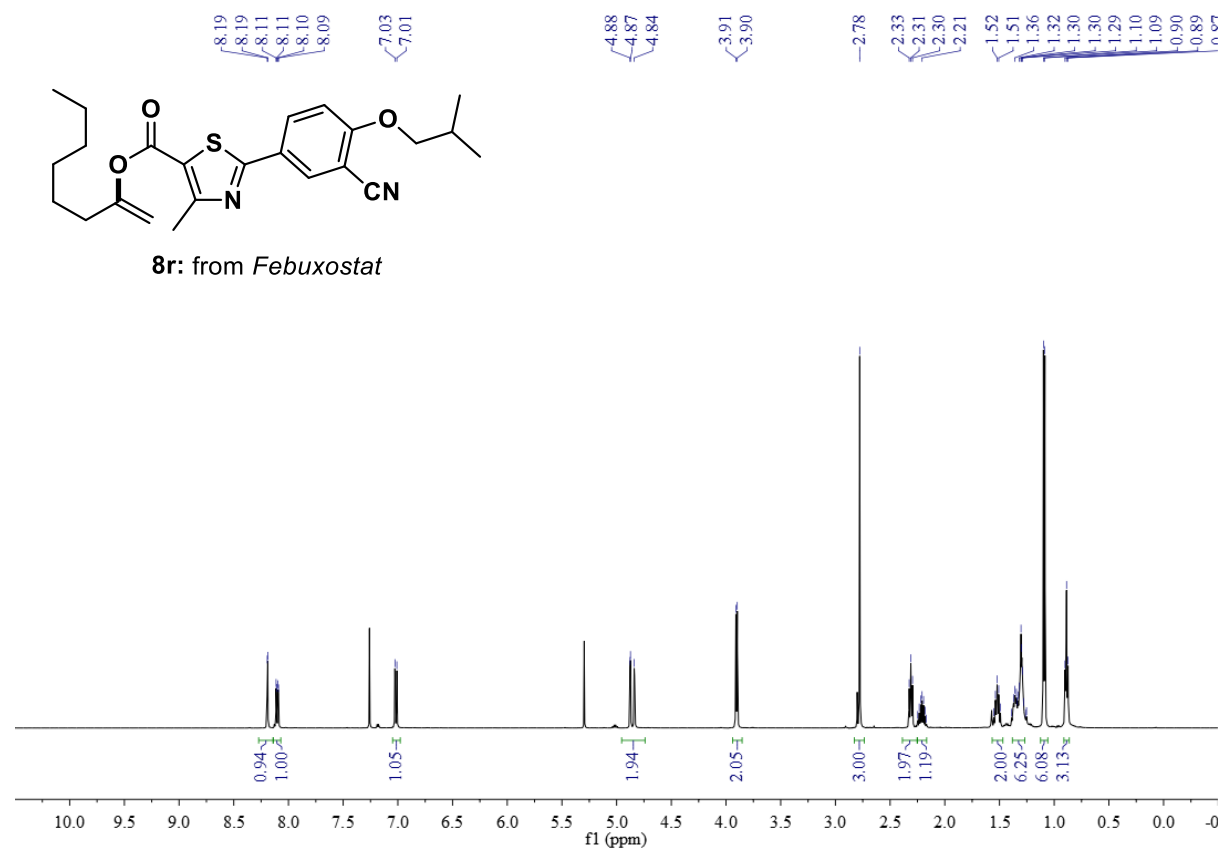

<sup>1</sup>H NMR (500 MHz, CDCl<sub>3</sub>) Spectrum of Compound **8r**.

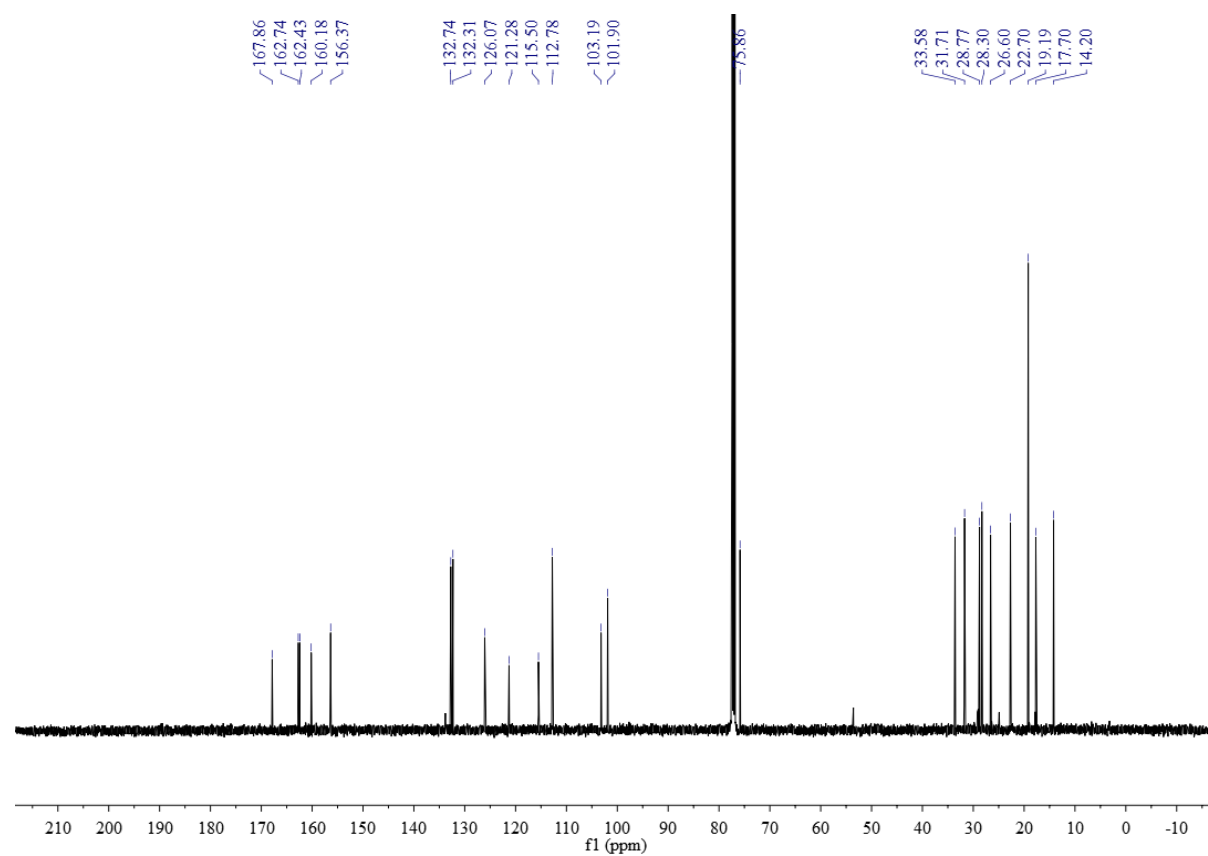

<sup>13</sup>C NMR (126 MHz, CDCl<sub>3</sub>) Spectrum of Compound **8r**.

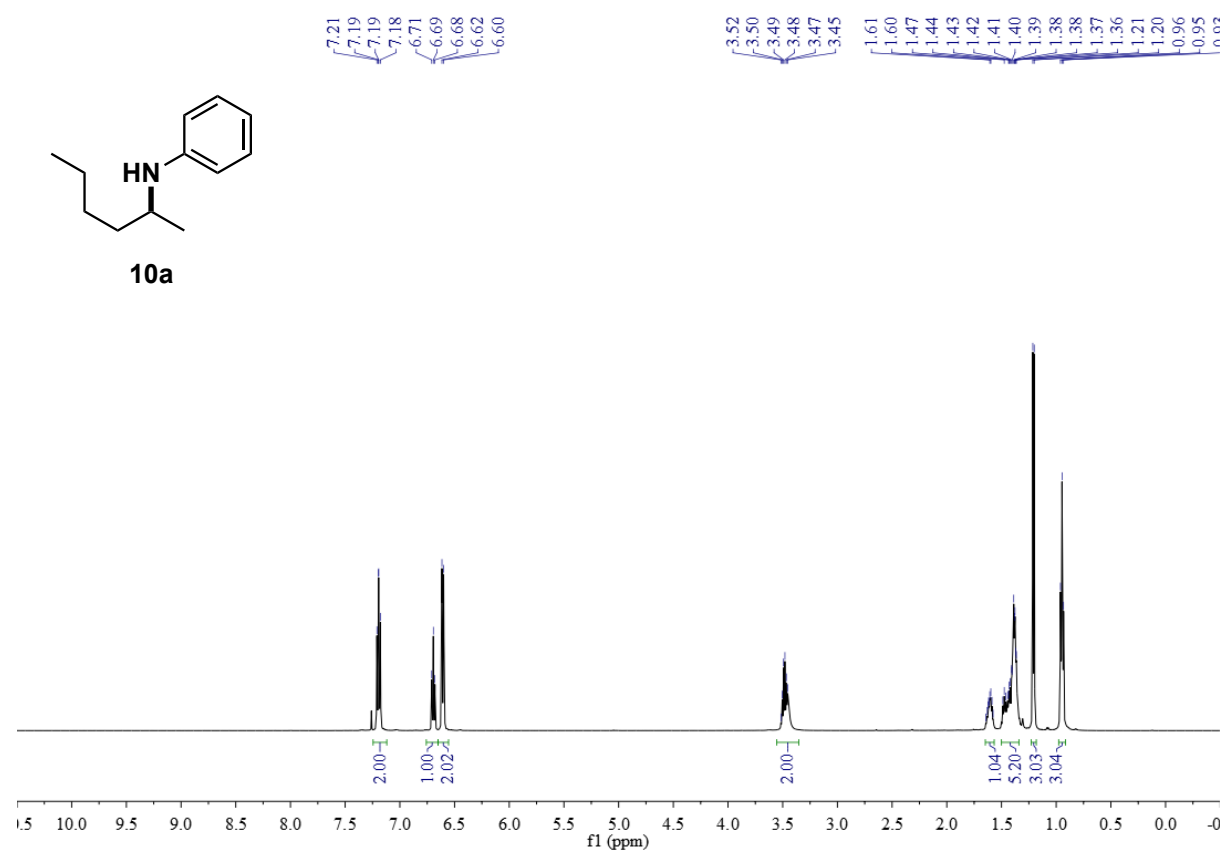

<sup>1</sup>H NMR (500 MHz, CDCl<sub>3</sub>) Spectrum of Compound **10a**.

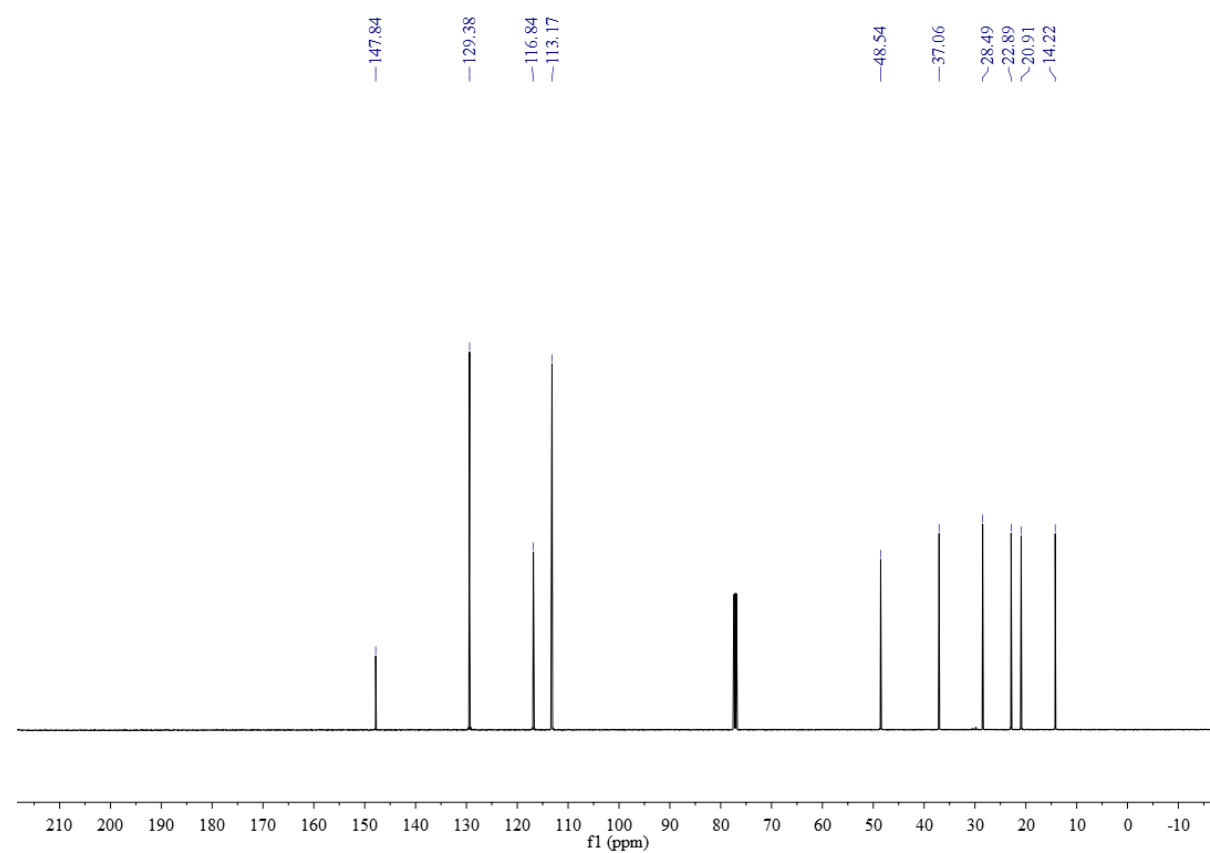

<sup>13</sup>C NMR (126 MHz, CDCl<sub>3</sub>) Spectrum of Compound **10a**.

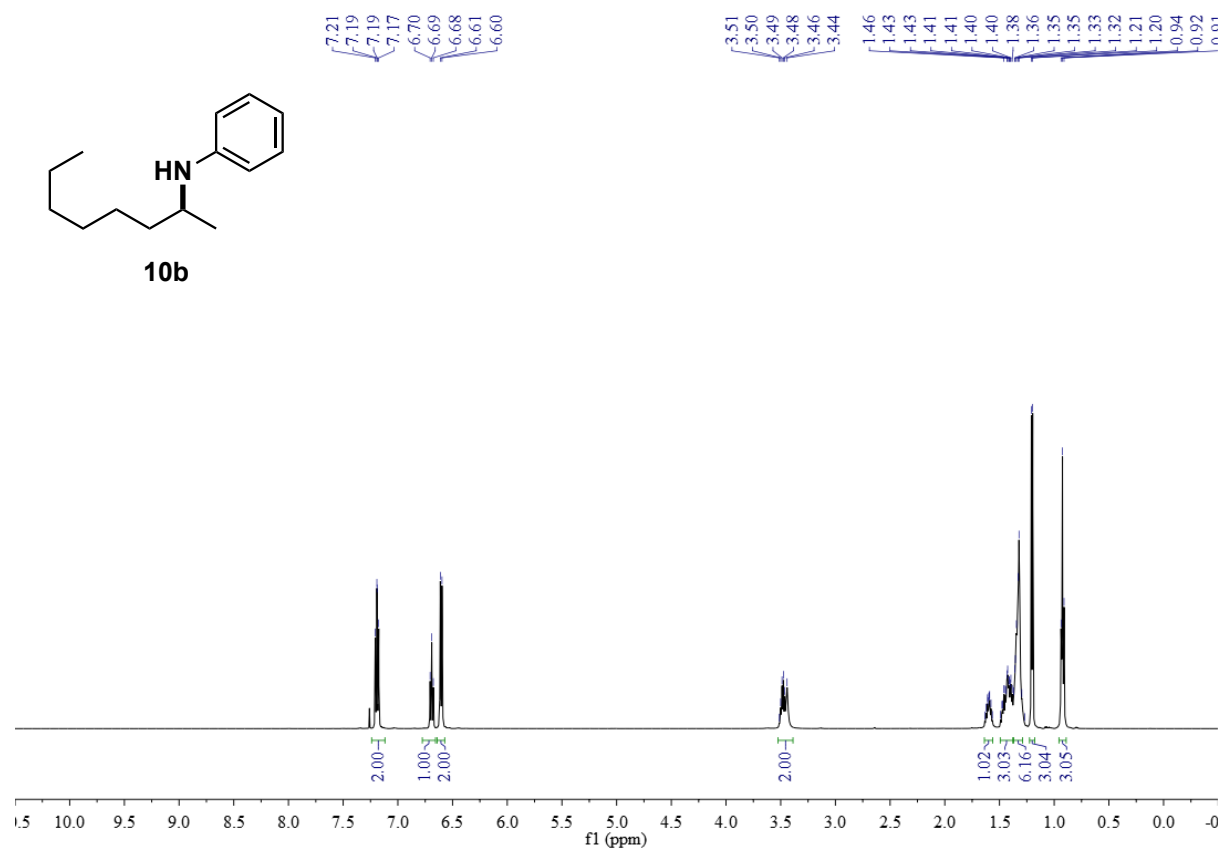

<sup>1</sup>H NMR (500 MHz, CDCl<sub>3</sub>) Spectrum of Compound **10b**.

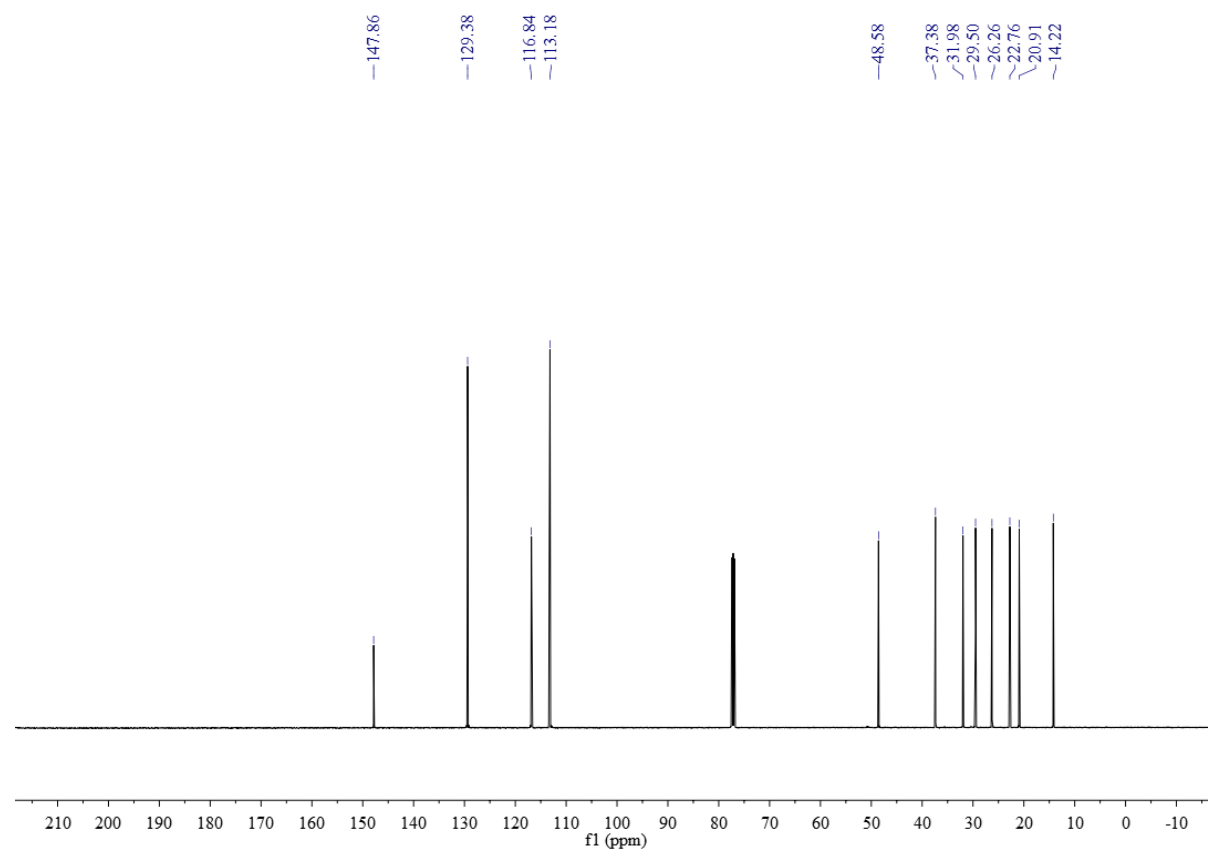

<sup>13</sup>C NMR (126 MHz, CDCl<sub>3</sub>) Spectrum of Compound **10b**.

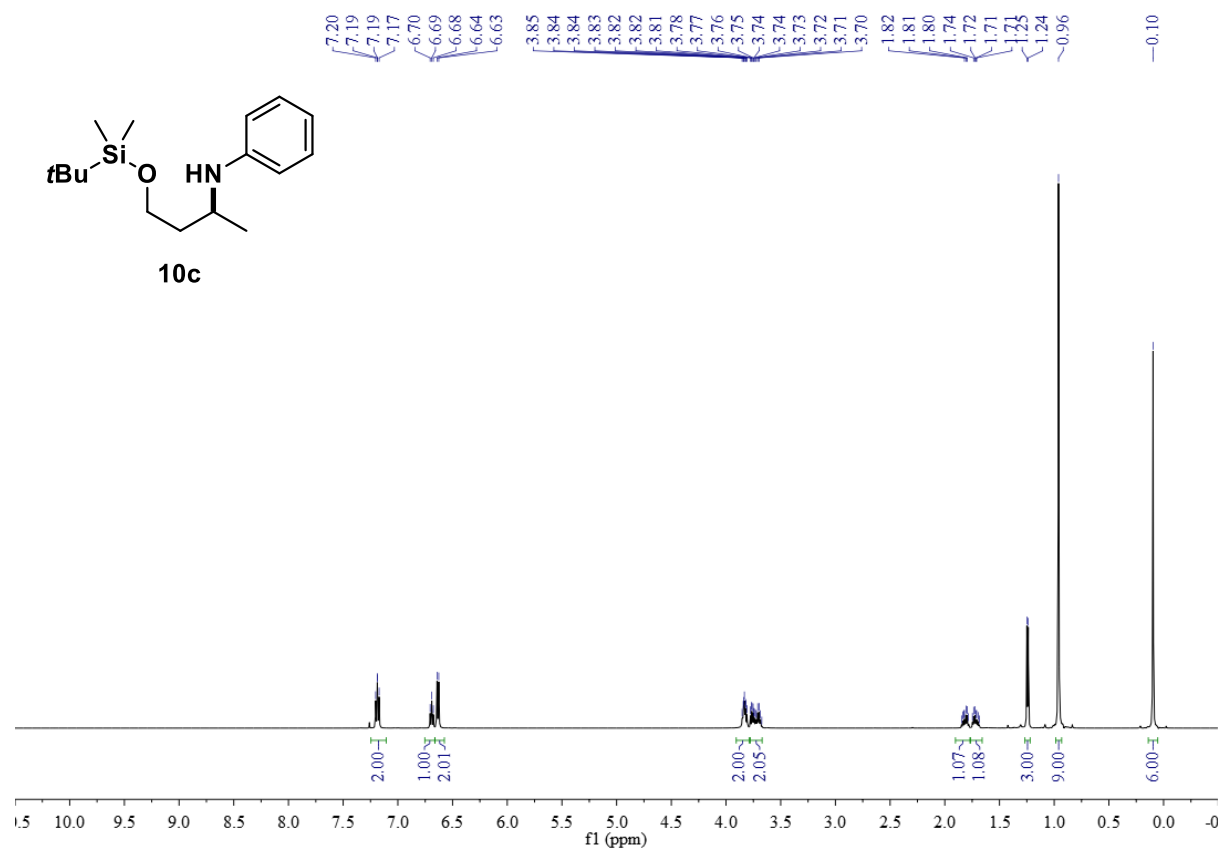

<sup>1</sup>H NMR (500 MHz, CDCl<sub>3</sub>) Spectrum of Compound **10c**.

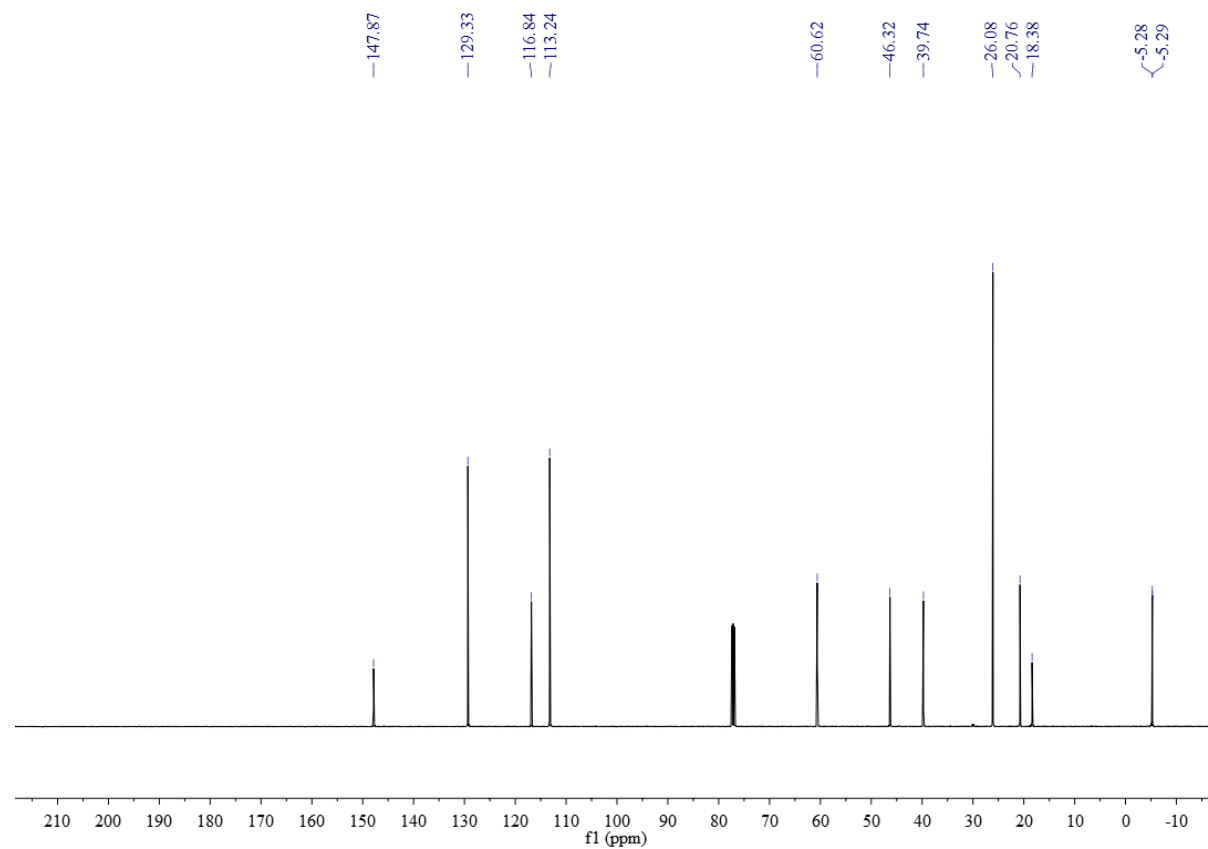

<sup>13</sup>C NMR (126 MHz, CDCl<sub>3</sub>) Spectrum of Compound **10c**.

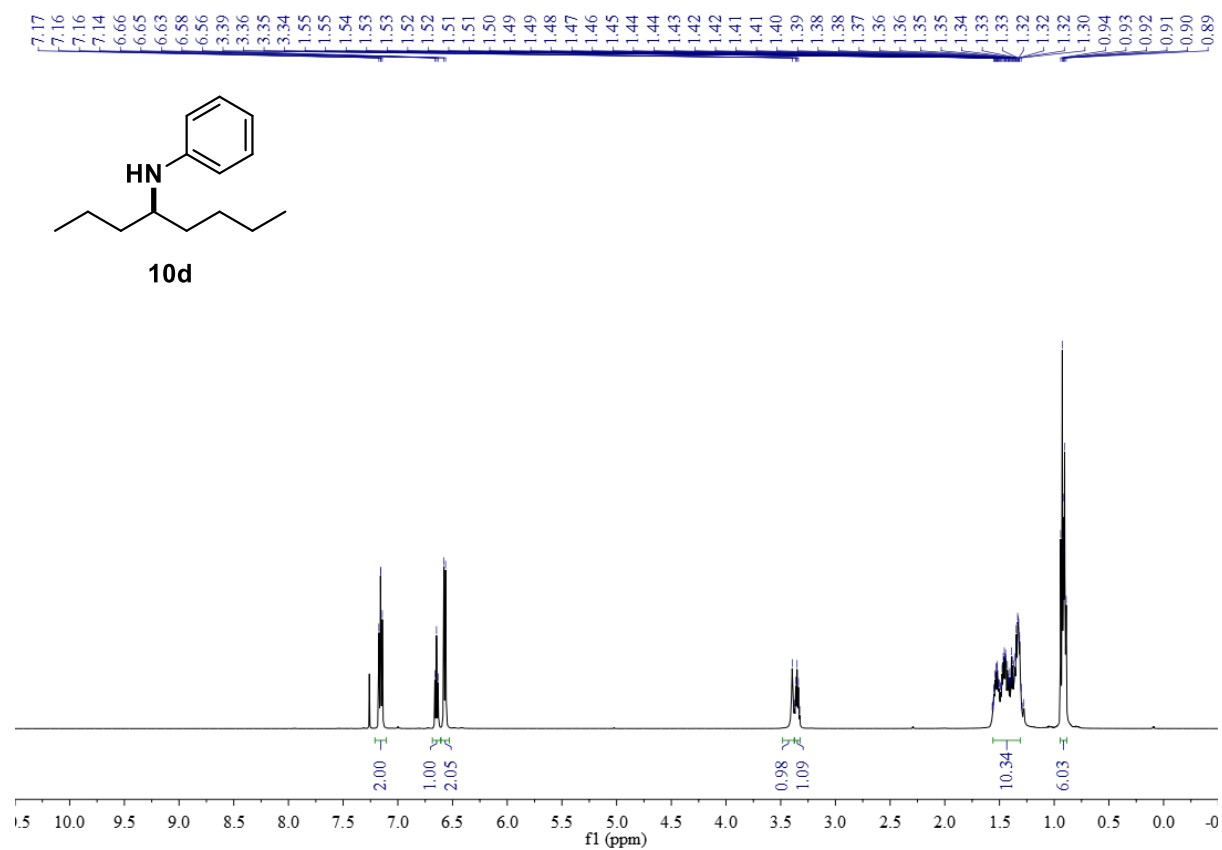

<sup>1</sup>H NMR (500 MHz, CDCl<sub>3</sub>) Spectrum of Compound **10d**.

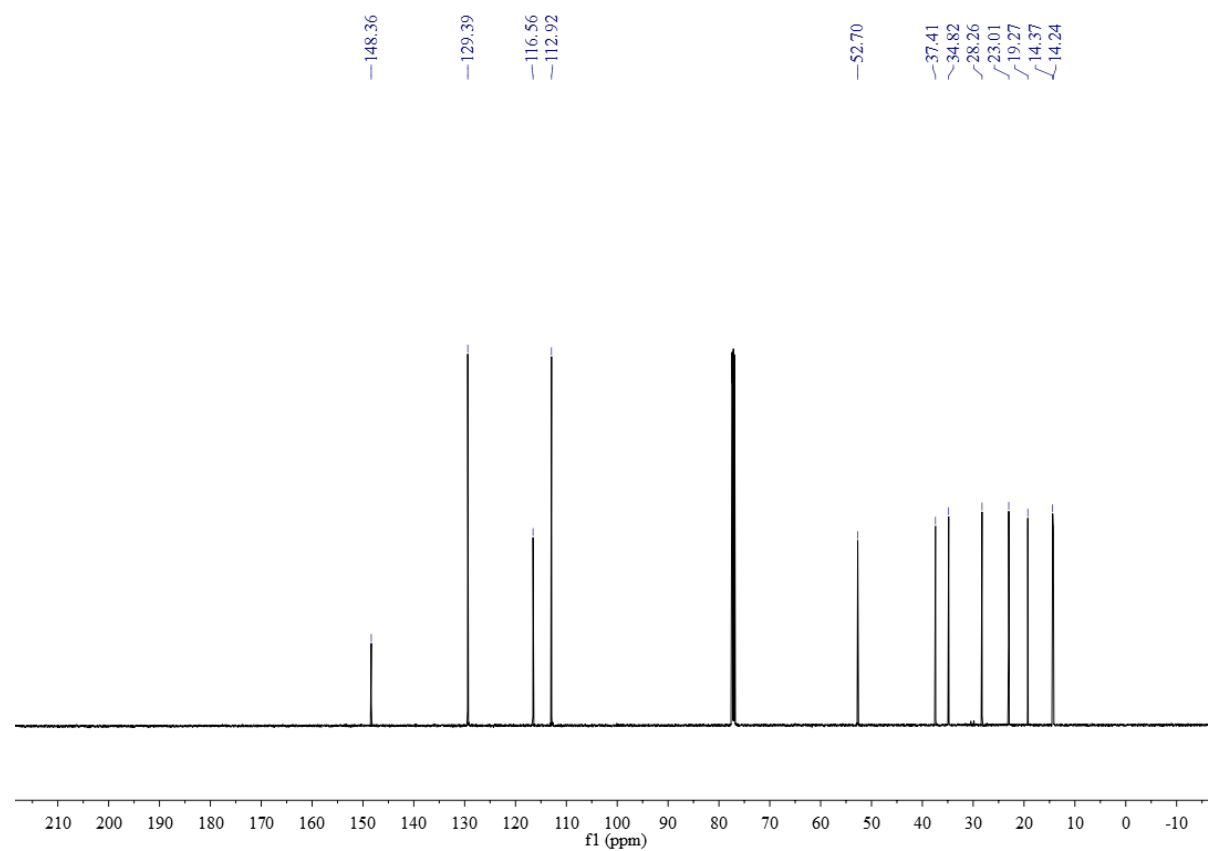

<sup>13</sup>C NMR (126 MHz, CDCl<sub>3</sub>) Spectrum of Compound **10d**.



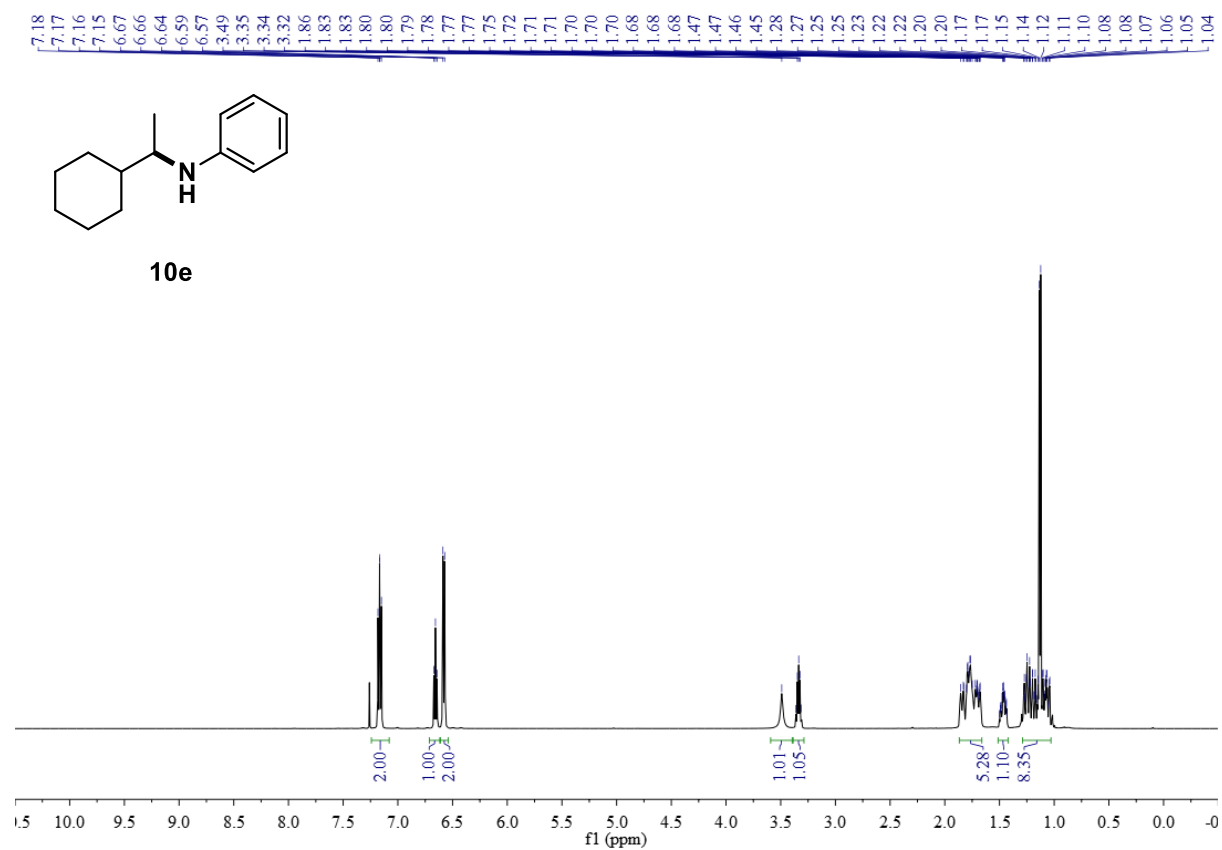

<sup>1</sup>H NMR (500 MHz, CDCl<sub>3</sub>) Spectrum of Compound **10e**.

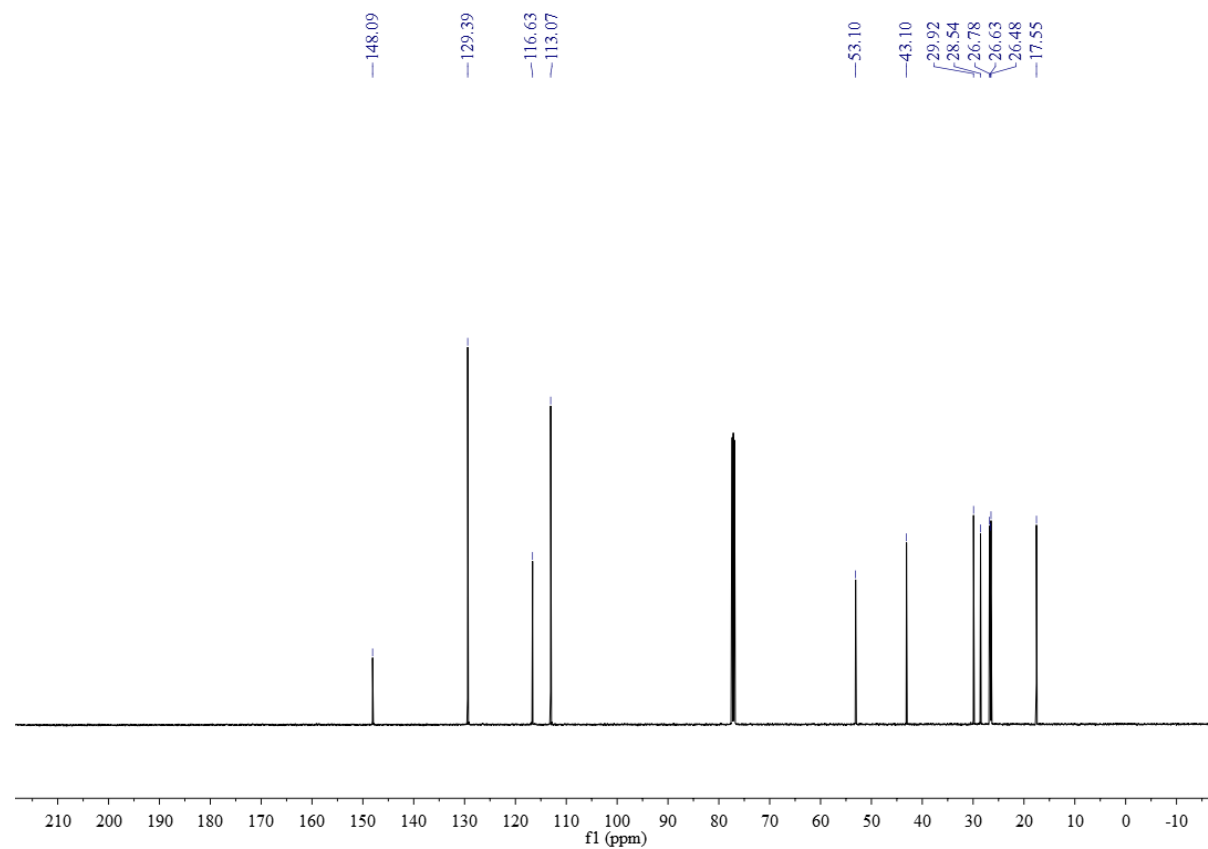

<sup>13</sup>C NMR (126 MHz, CDCl<sub>3</sub>) Spectrum of Compound **10e**.

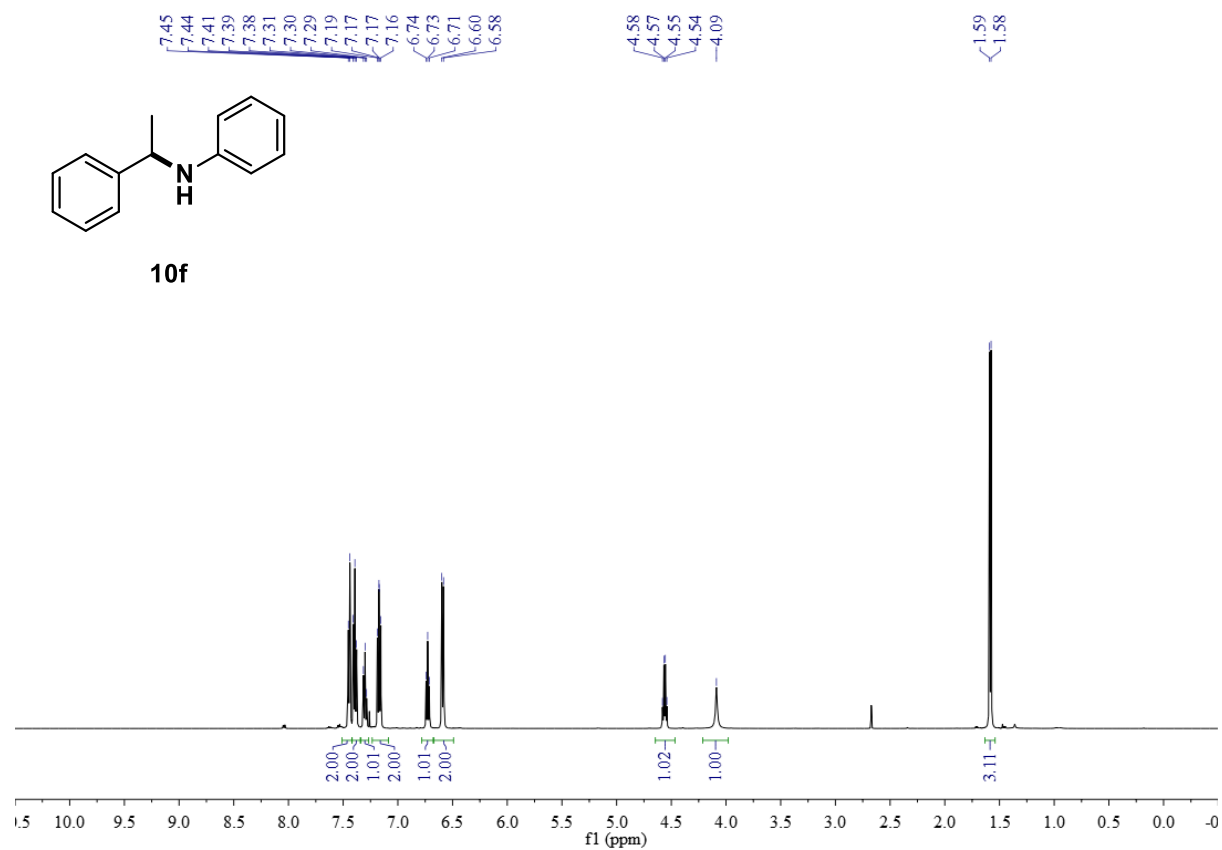<sup>1</sup>H NMR (500 MHz, CDCl<sub>3</sub>) Spectrum of Compound **10f**.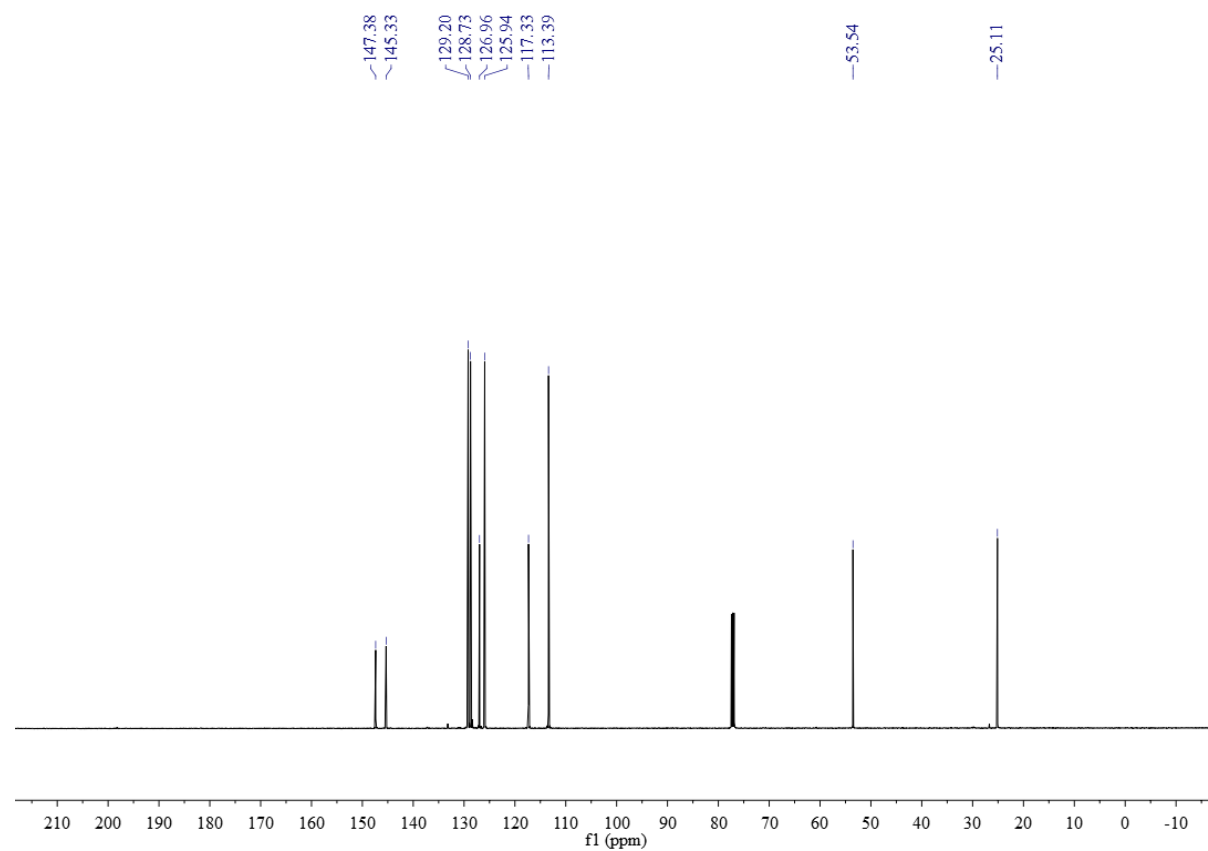<sup>13</sup>C NMR (126 MHz, CDCl<sub>3</sub>) Spectrum of Compound **10f**.

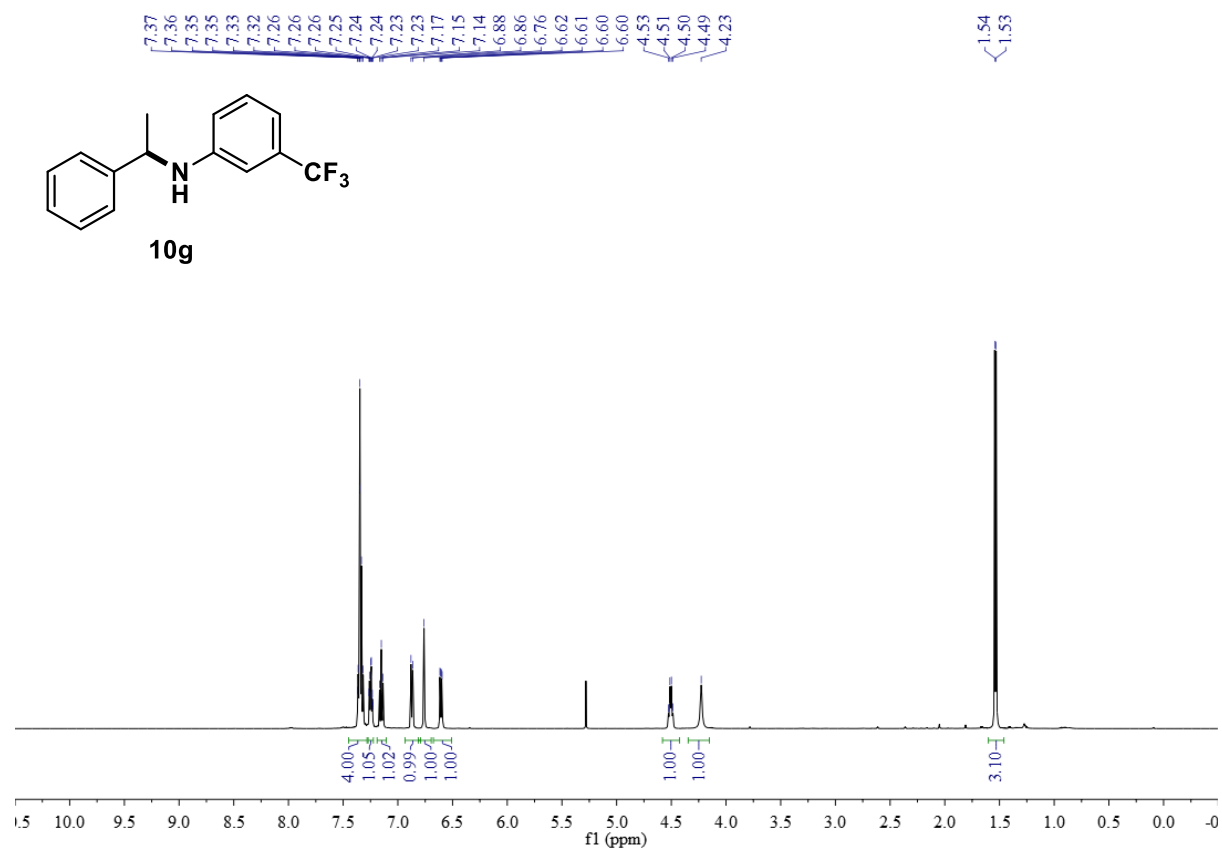

<sup>1</sup>H NMR (500 MHz, CDCl<sub>3</sub>) Spectrum of Compound **10g**.

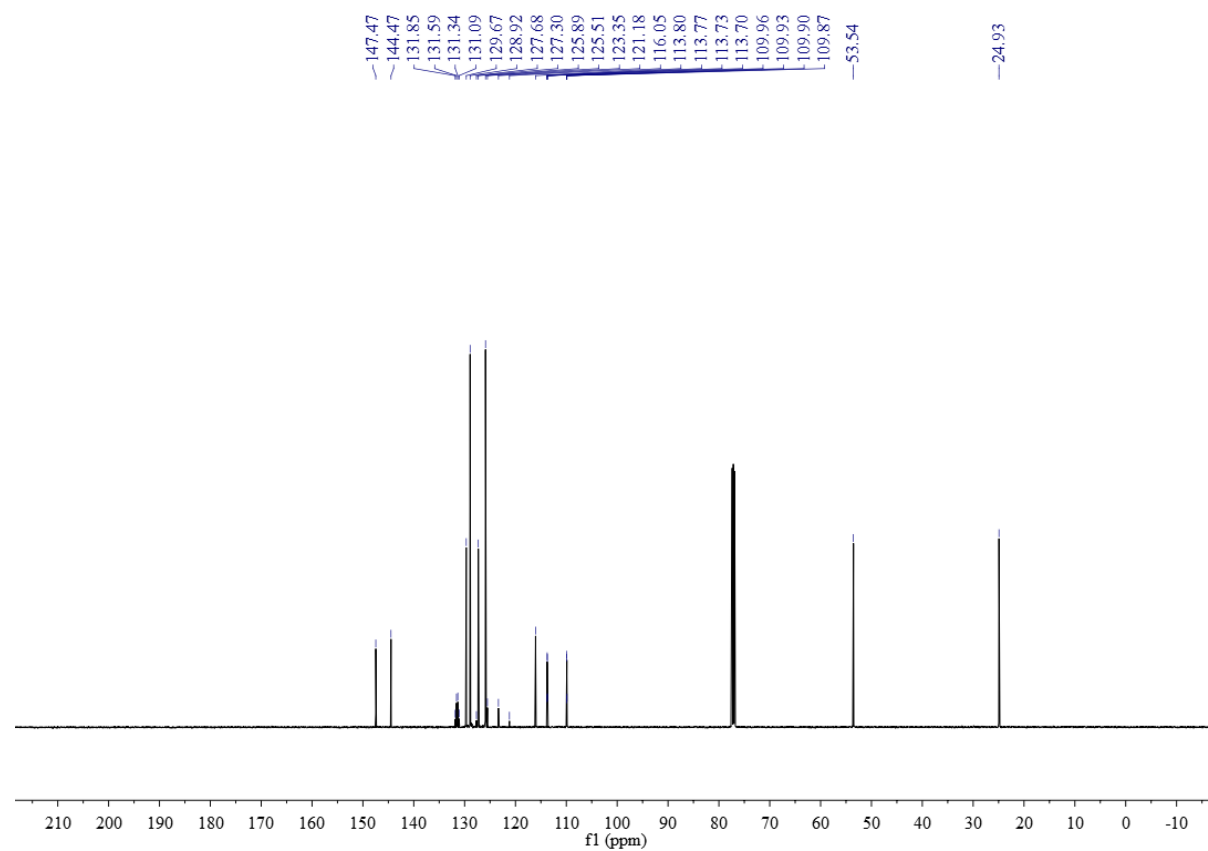

<sup>13</sup>C NMR (126 MHz, CDCl<sub>3</sub>) Spectrum of Compound **10g**.

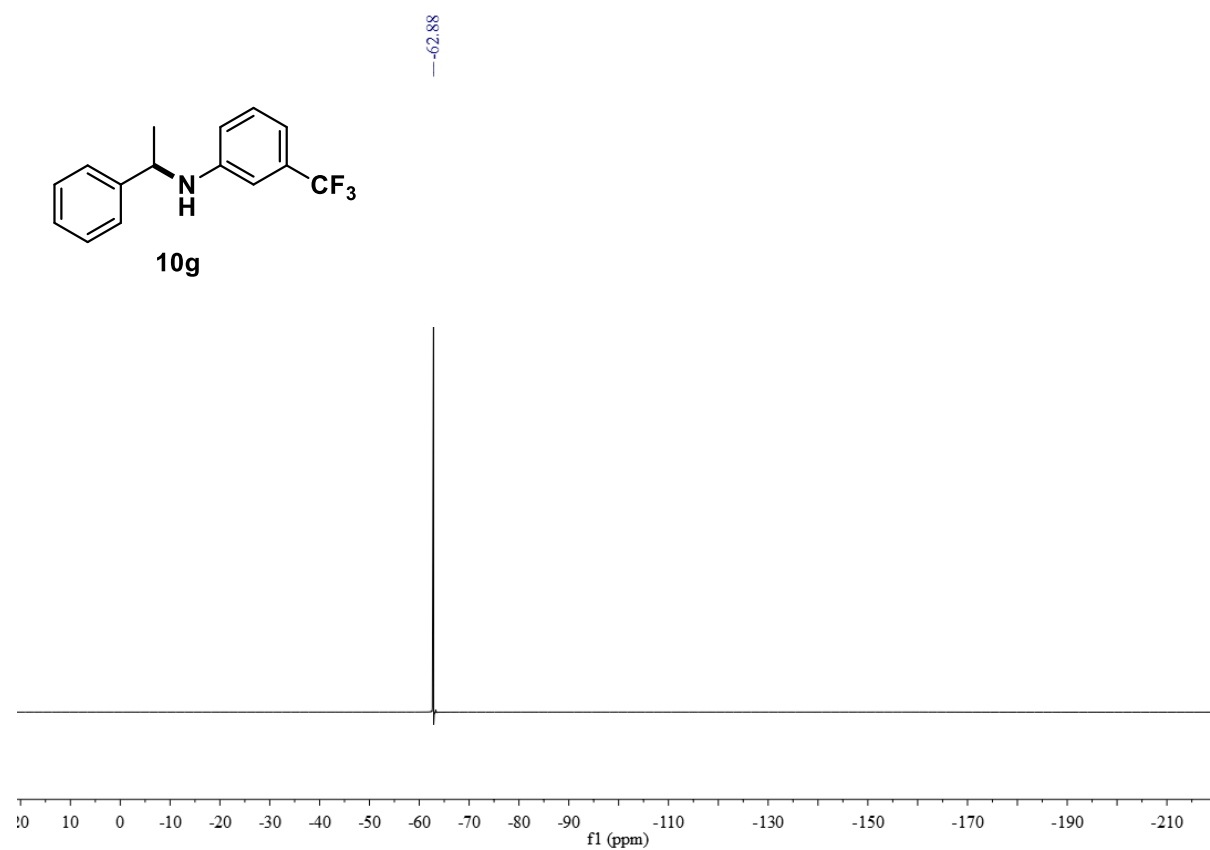

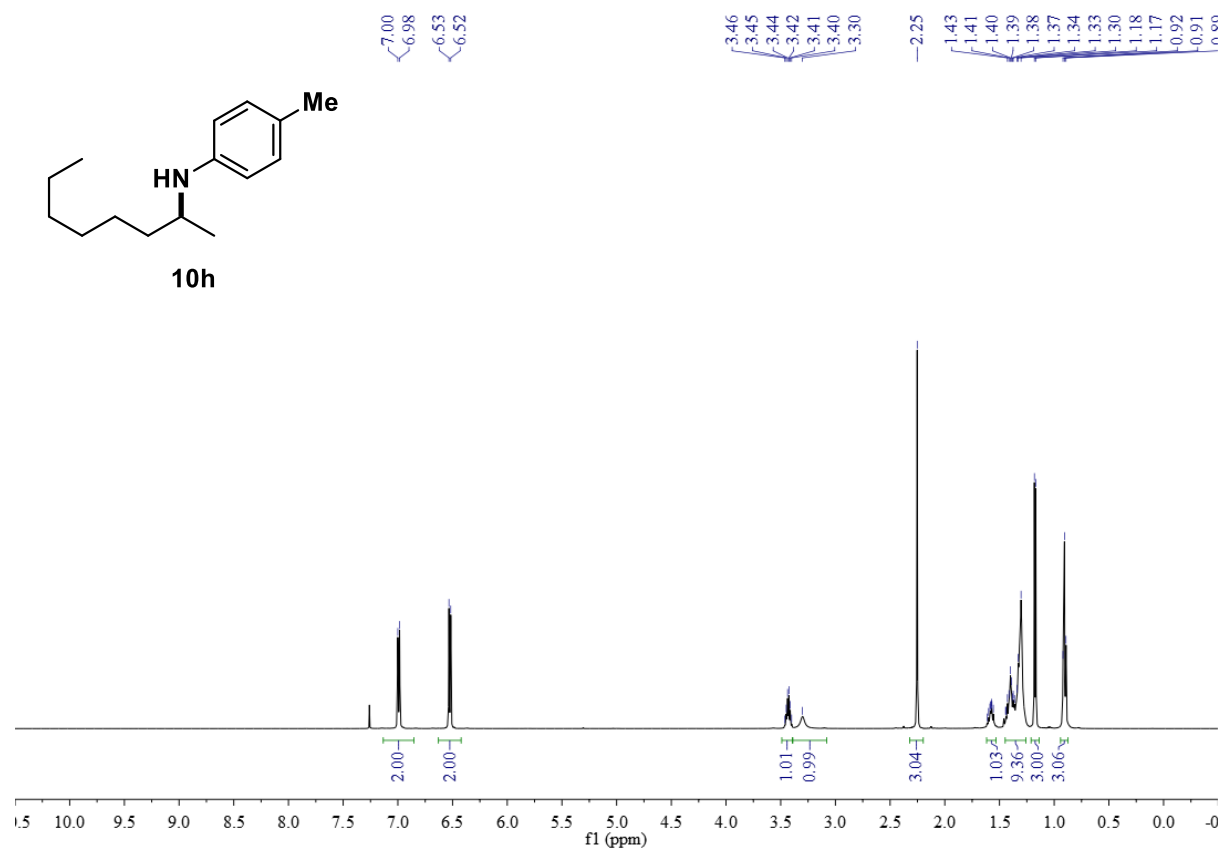

<sup>1</sup>H NMR (500 MHz, CDCl<sub>3</sub>) Spectrum of Compound **10h**.

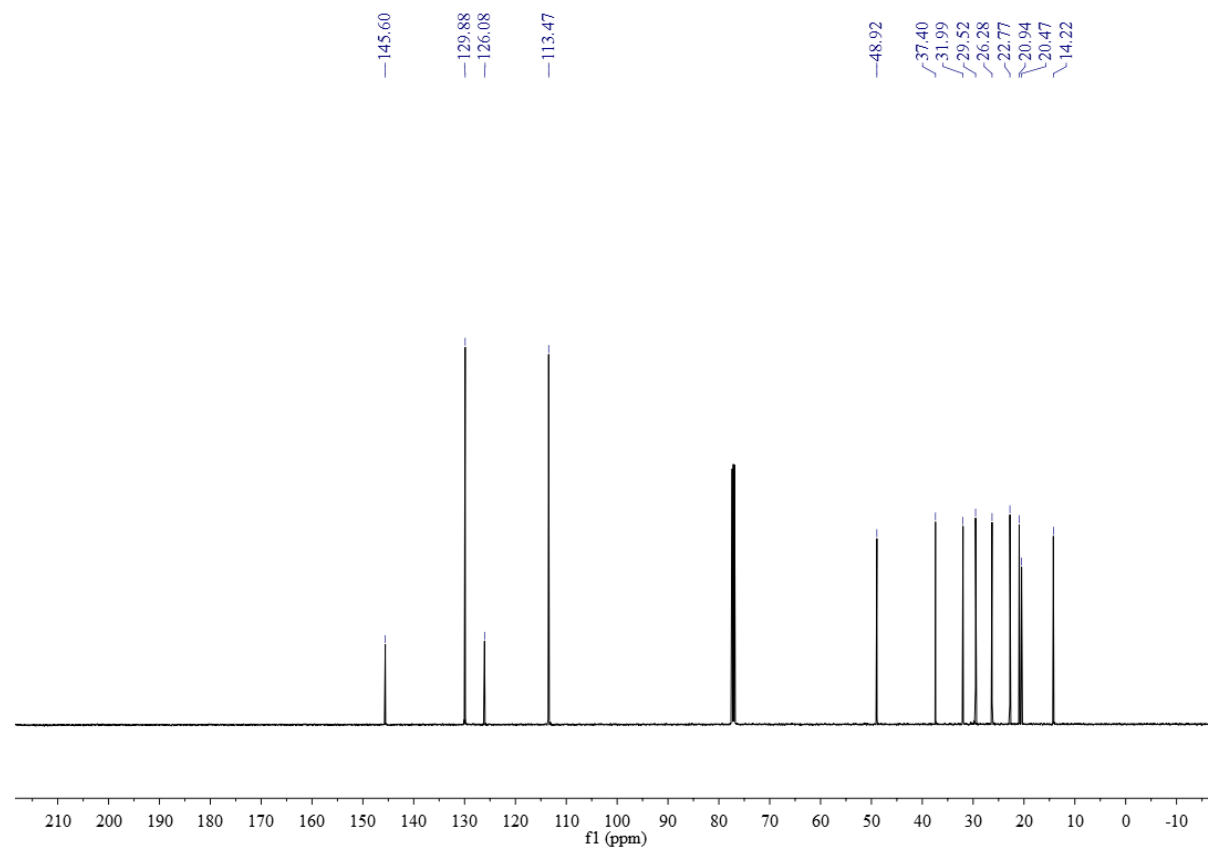

<sup>13</sup>C NMR (126 MHz, CDCl<sub>3</sub>) Spectrum of Compound **10h**.

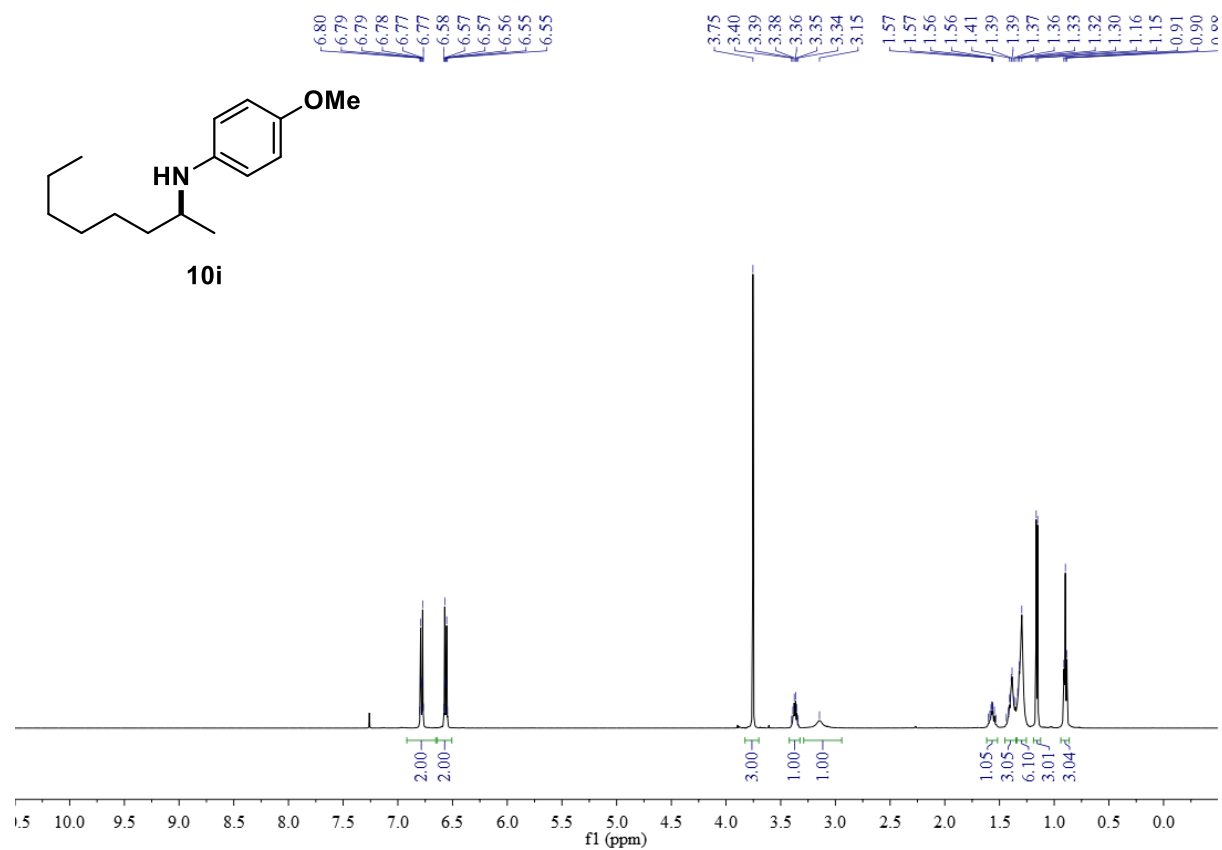

<sup>1</sup>H NMR (500 MHz, CDCl<sub>3</sub>) Spectrum of Compound **10i**.

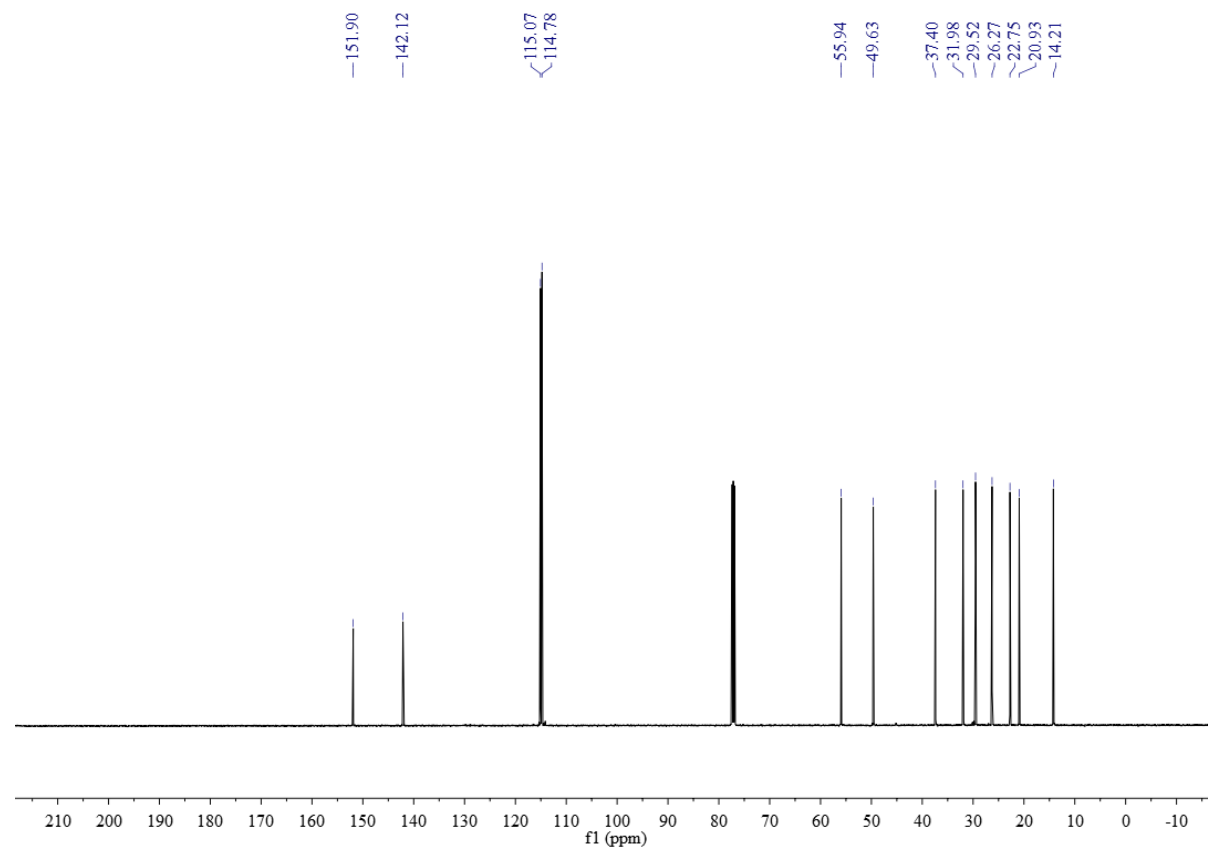

<sup>13</sup>C NMR (126 MHz, CDCl<sub>3</sub>) Spectrum of Compound **10i**.

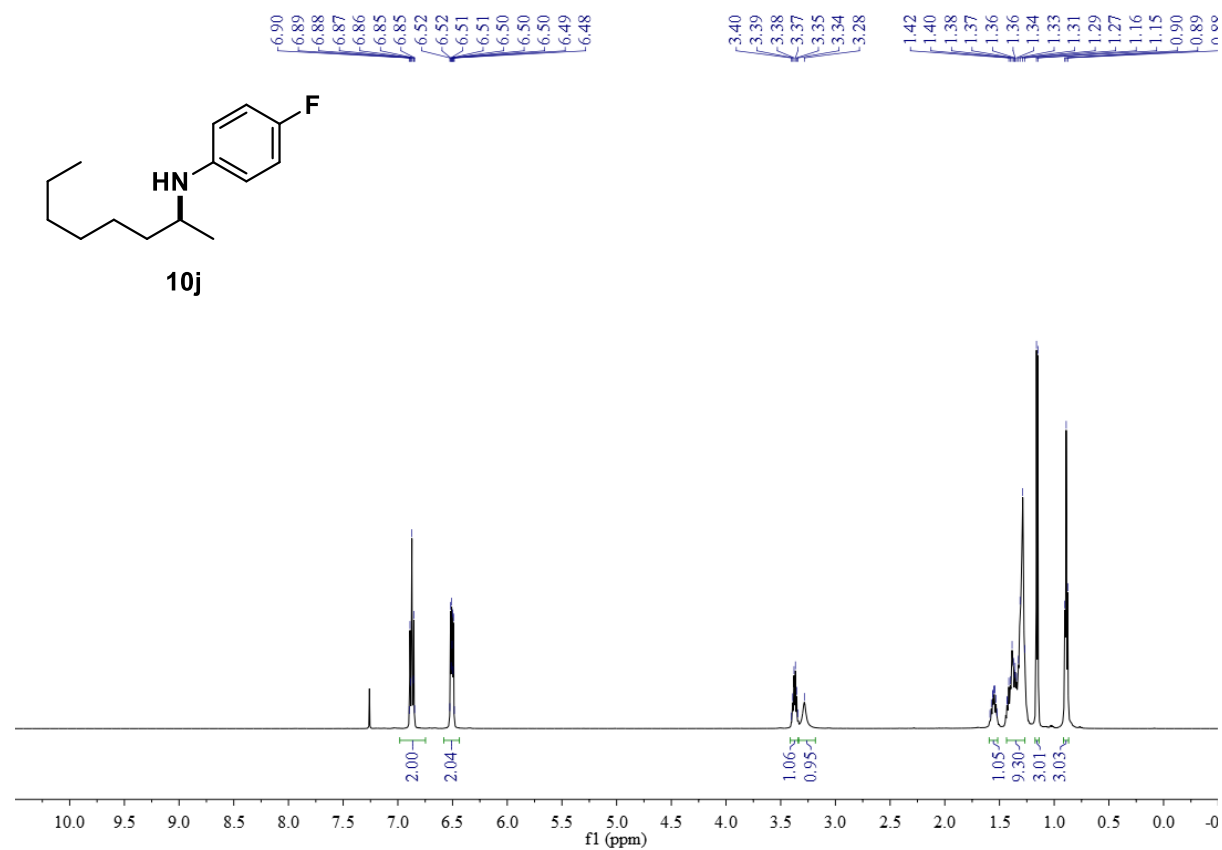

<sup>1</sup>H NMR (500 MHz, CDCl<sub>3</sub>) Spectrum of Compound **10j**.

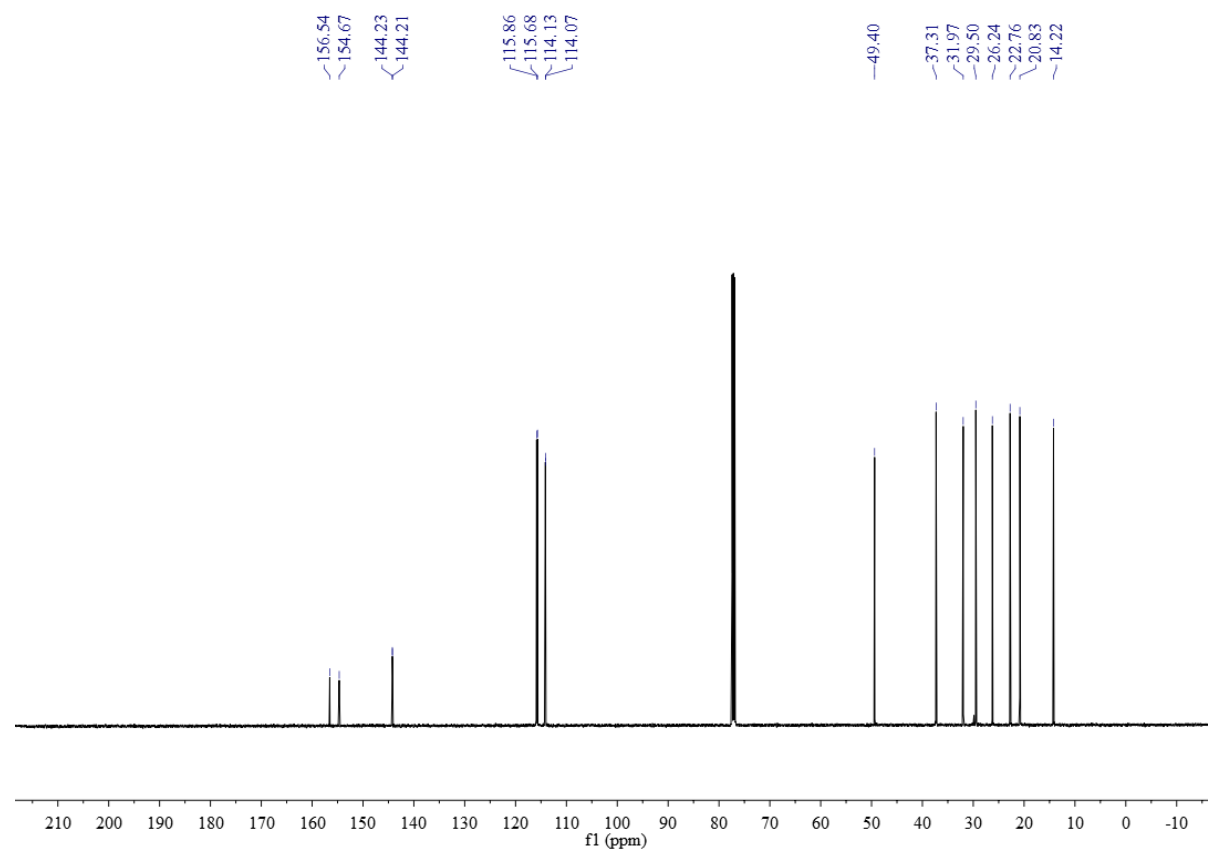

<sup>13</sup>C NMR (126 MHz, CDCl<sub>3</sub>) Spectrum of Compound **10j**.

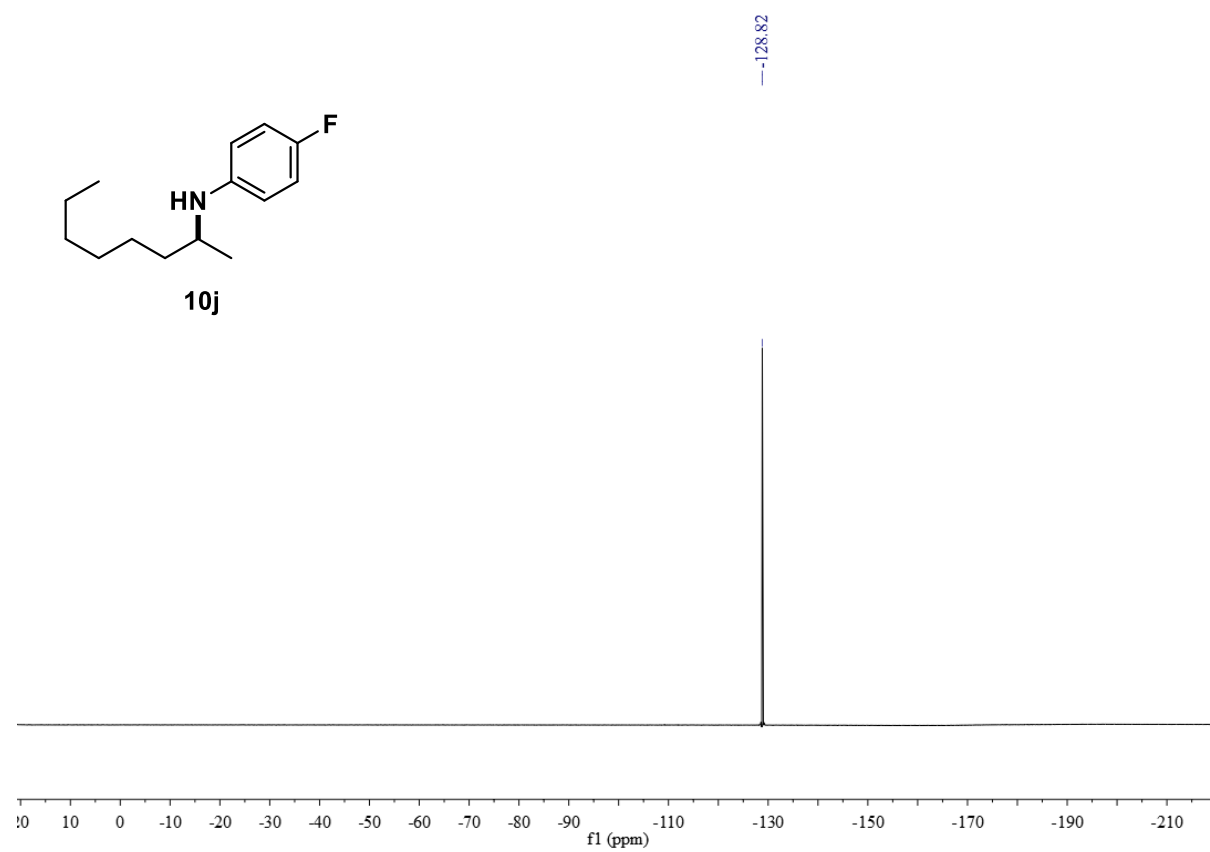

<sup>19</sup>F NMR (471 MHz, CDCl<sub>3</sub>) Spectrum of Compound **10j**.



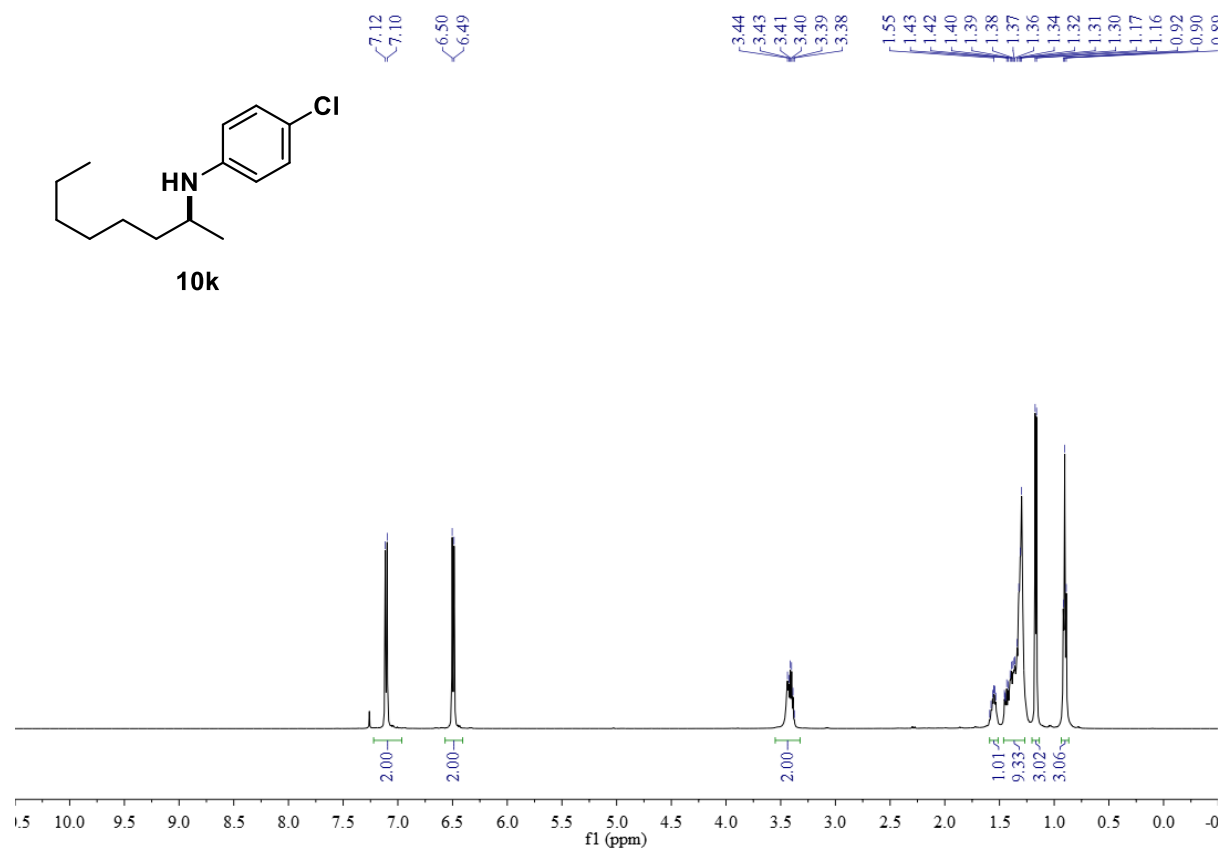

<sup>1</sup>H NMR (500 MHz, CDCl<sub>3</sub>) Spectrum of Compound **10k**.

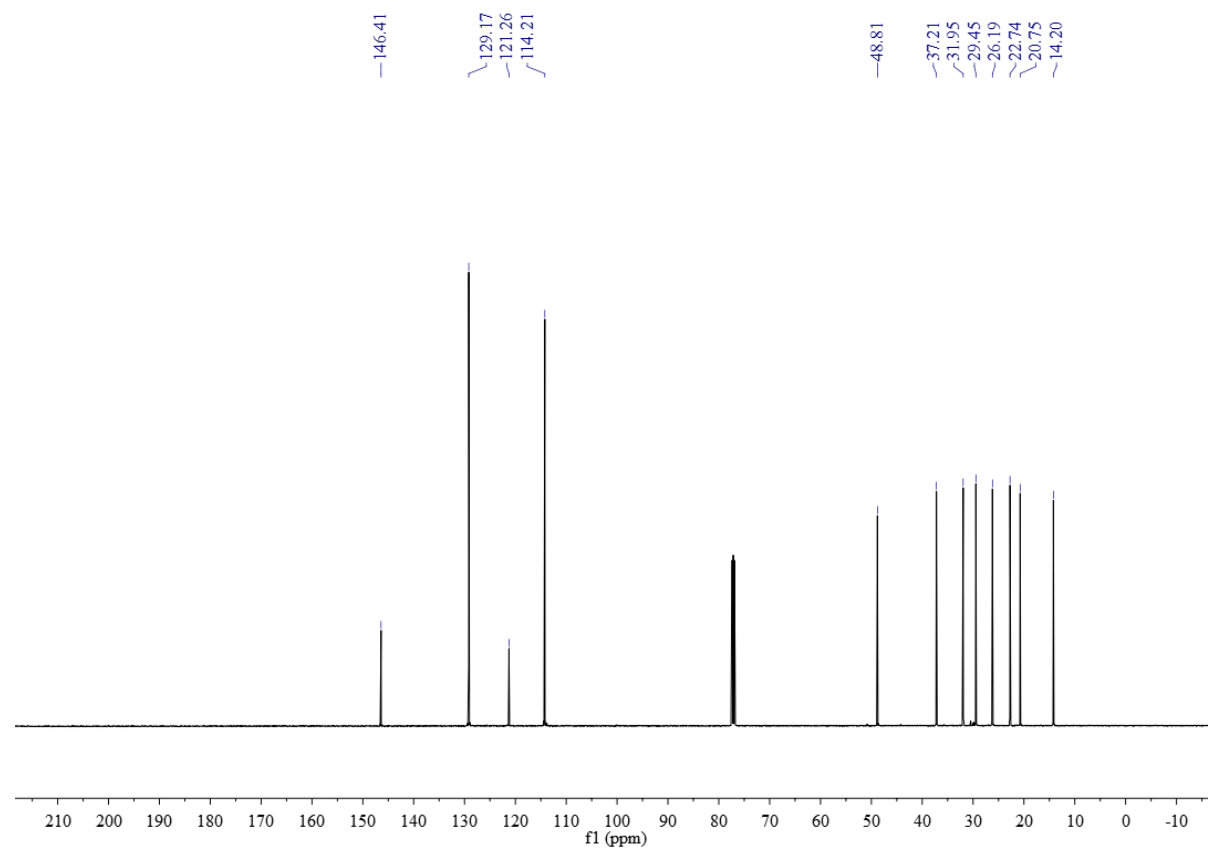

<sup>13</sup>C NMR (126 MHz, CDCl<sub>3</sub>) Spectrum of Compound **10k**.

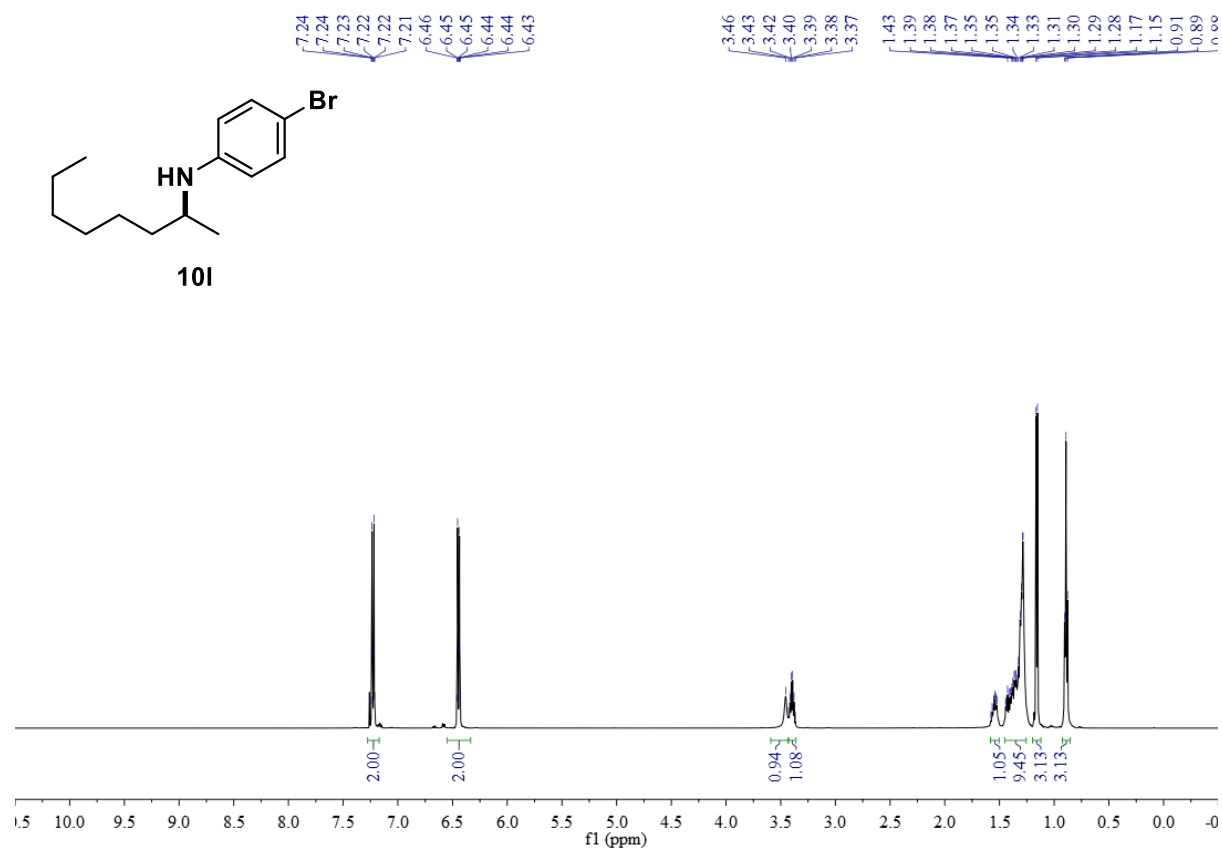

<sup>1</sup>H NMR (500 MHz, CDCl<sub>3</sub>) Spectrum of Compound **10l**.

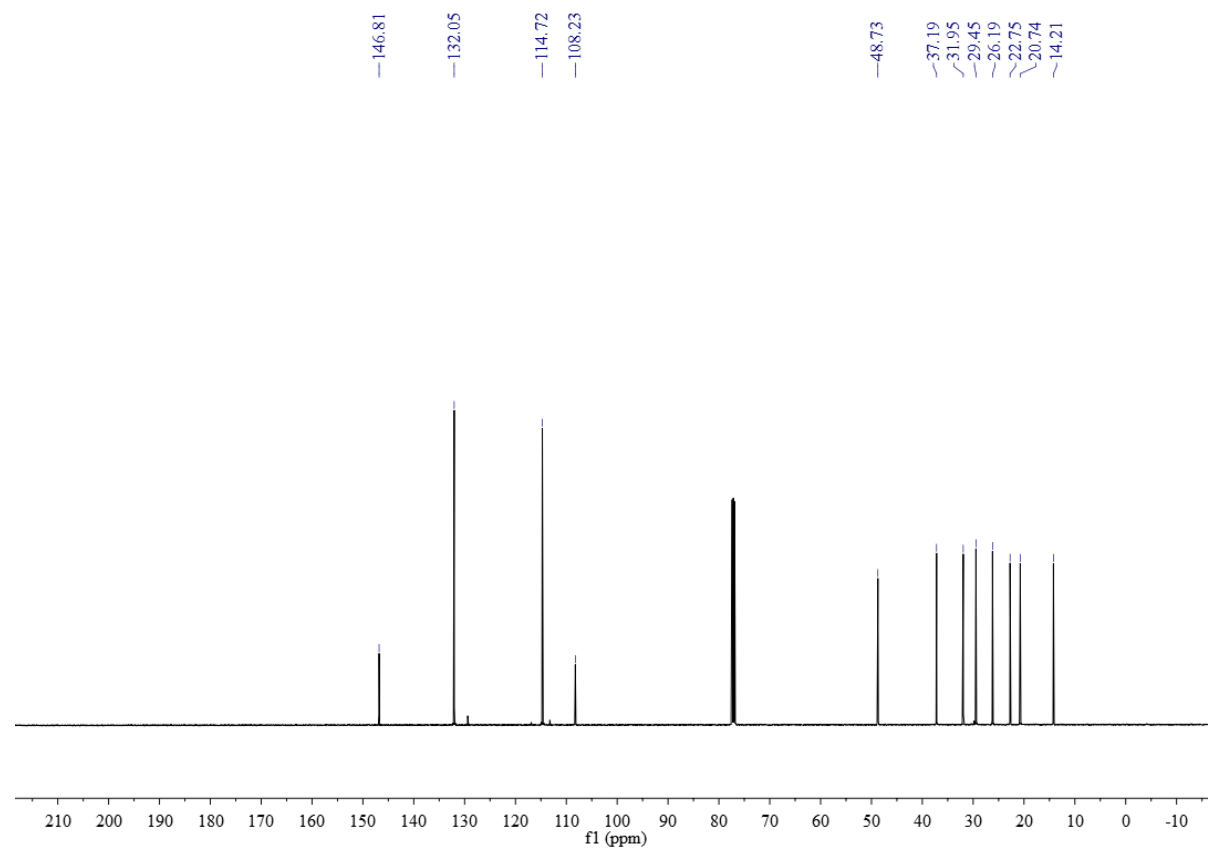

<sup>13</sup>C NMR (126 MHz, CDCl<sub>3</sub>) Spectrum of Compound **10l**.

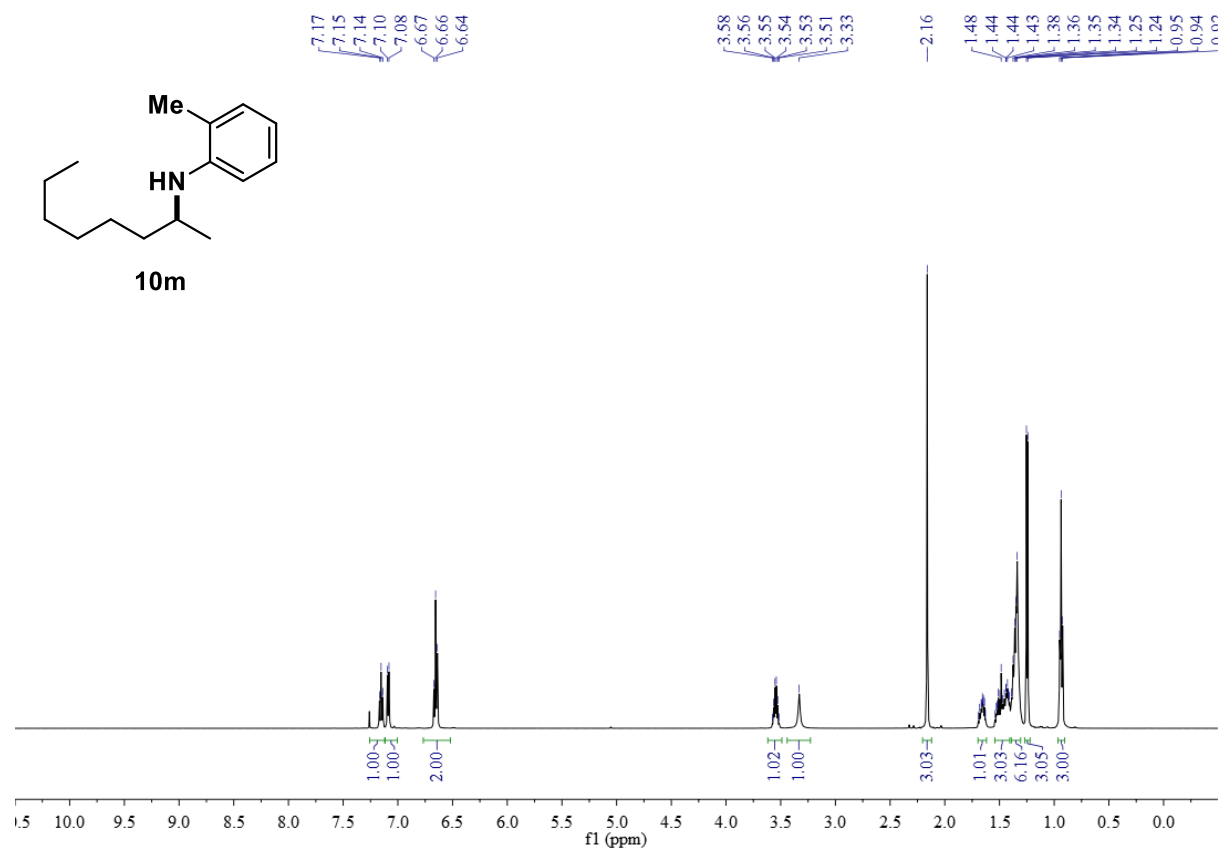

<sup>1</sup>H NMR (500 MHz, CDCl<sub>3</sub>) Spectrum of Compound **10m**.

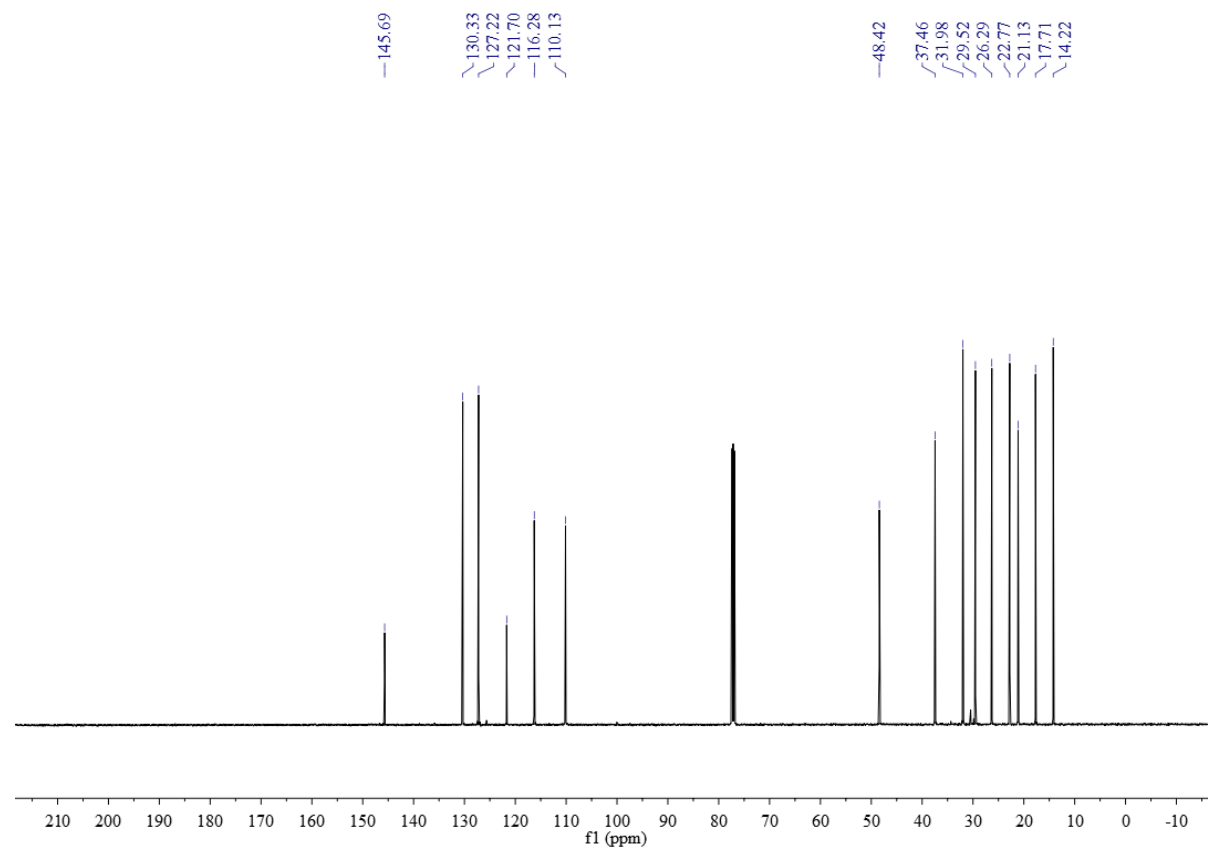

<sup>13</sup>C NMR (126 MHz, CDCl<sub>3</sub>) Spectrum of Compound **10m**.

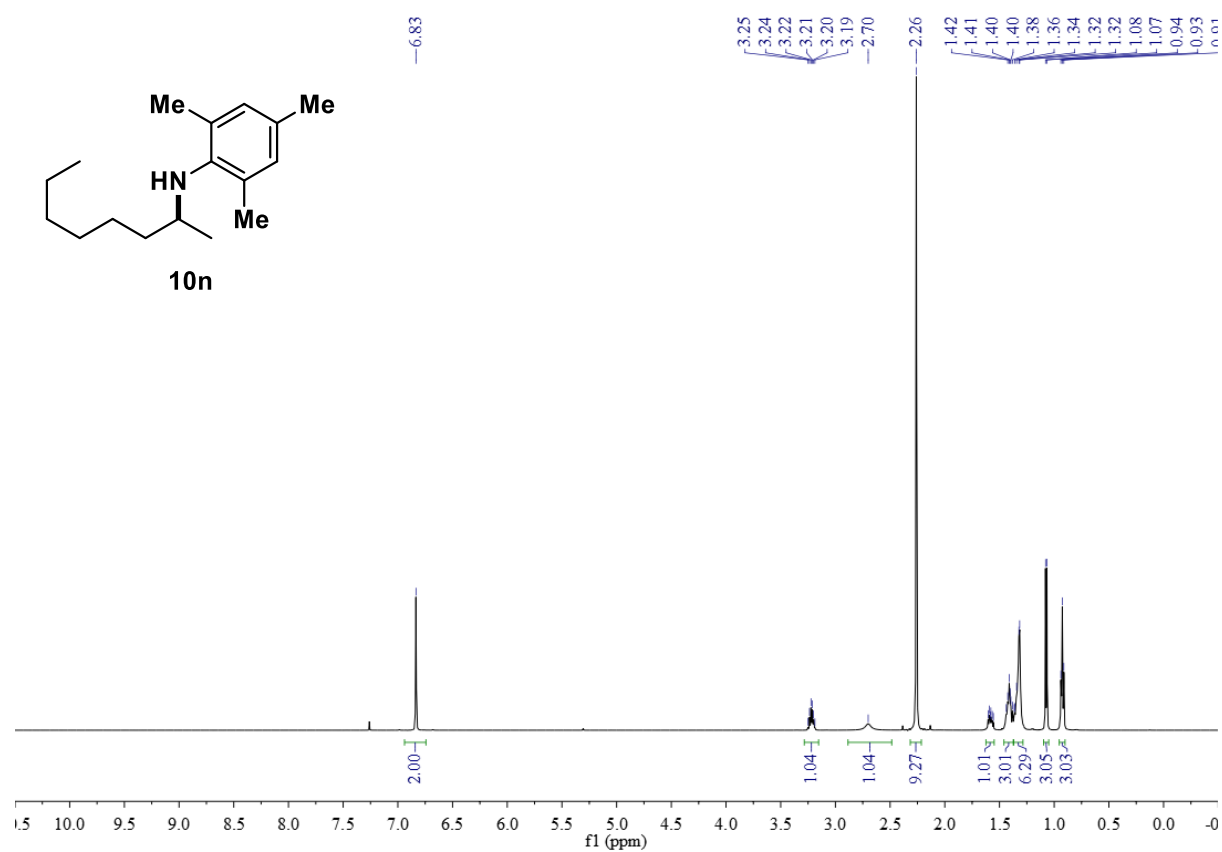

<sup>1</sup>H NMR (500 MHz, CDCl<sub>3</sub>) Spectrum of Compound **10n**.

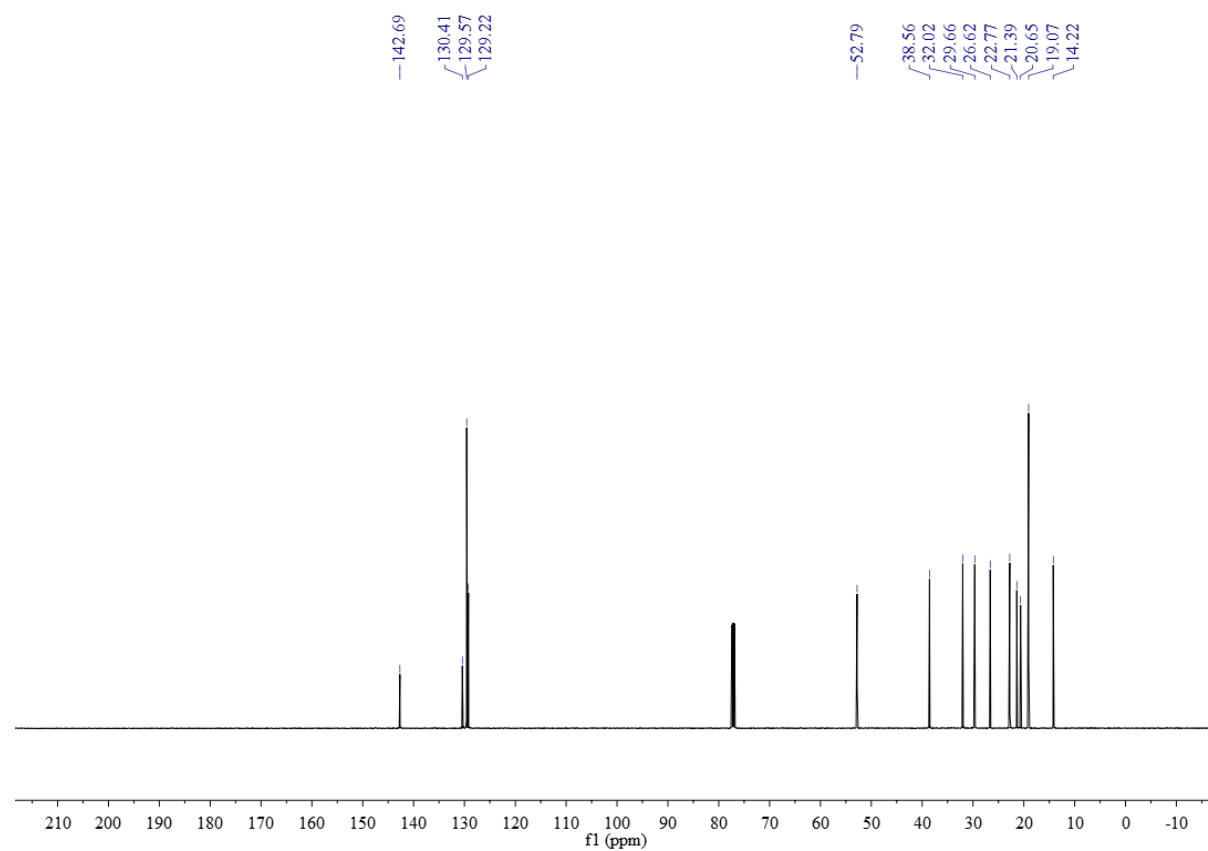

<sup>13</sup>C NMR (126 MHz, CDCl<sub>3</sub>) Spectrum of Compound **10n**.

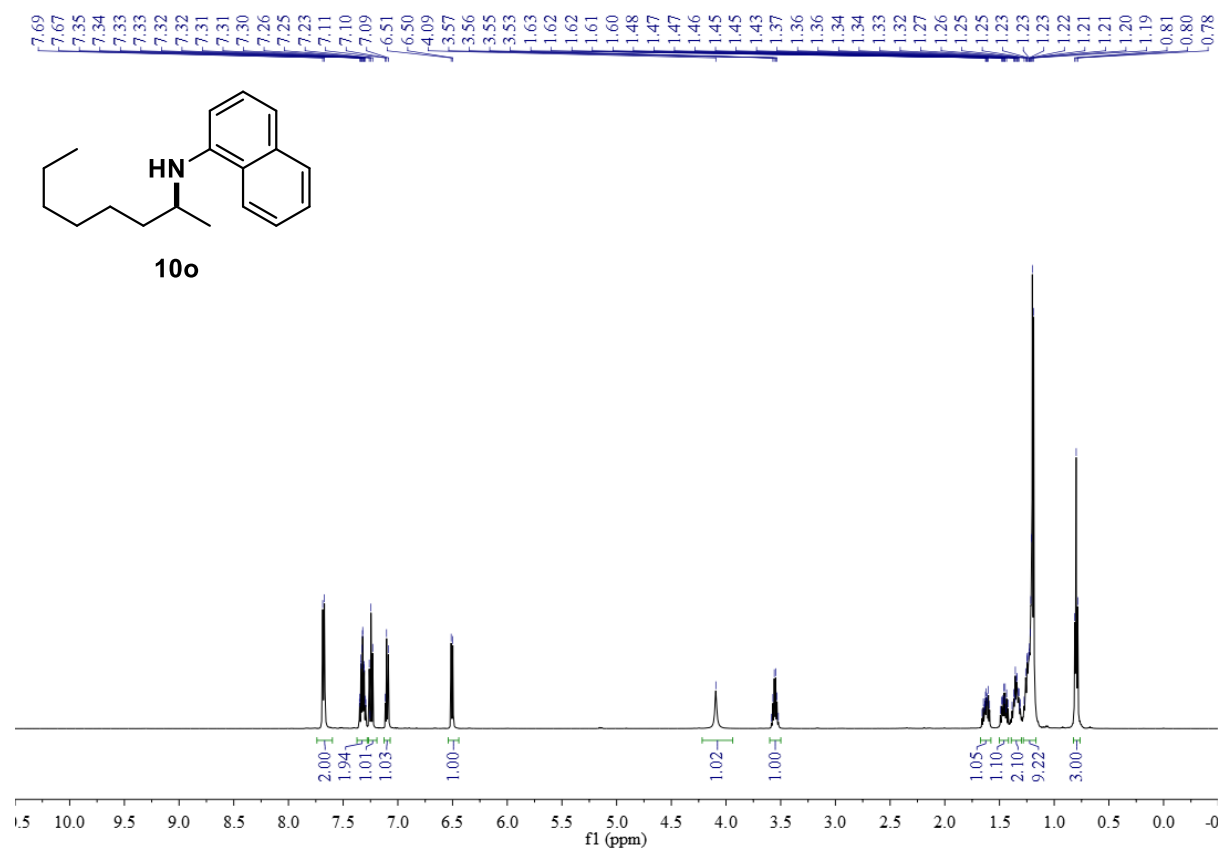

<sup>1</sup>H NMR (500 MHz, CDCl<sub>3</sub>) Spectrum of Compound **10o**.

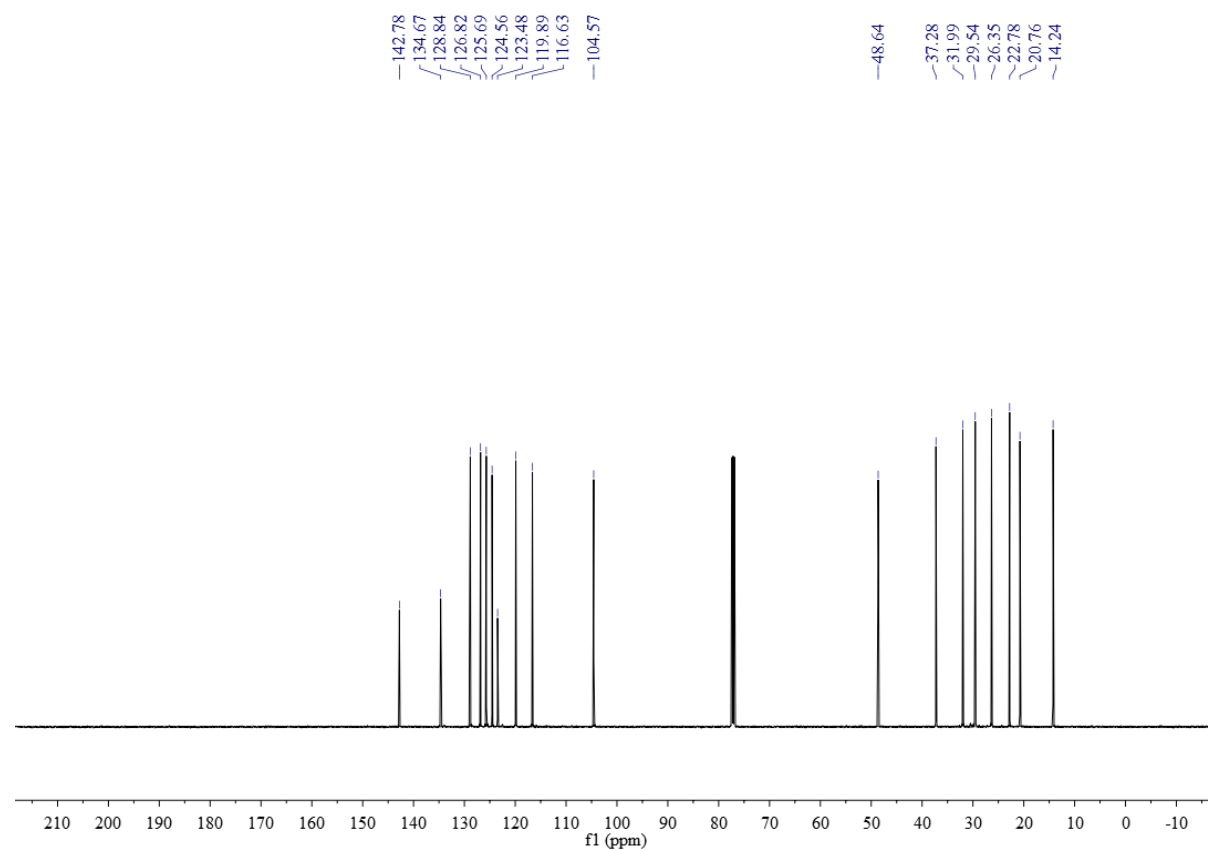

<sup>13</sup>C NMR (126 MHz, CDCl<sub>3</sub>) Spectrum of Compound **10o**.

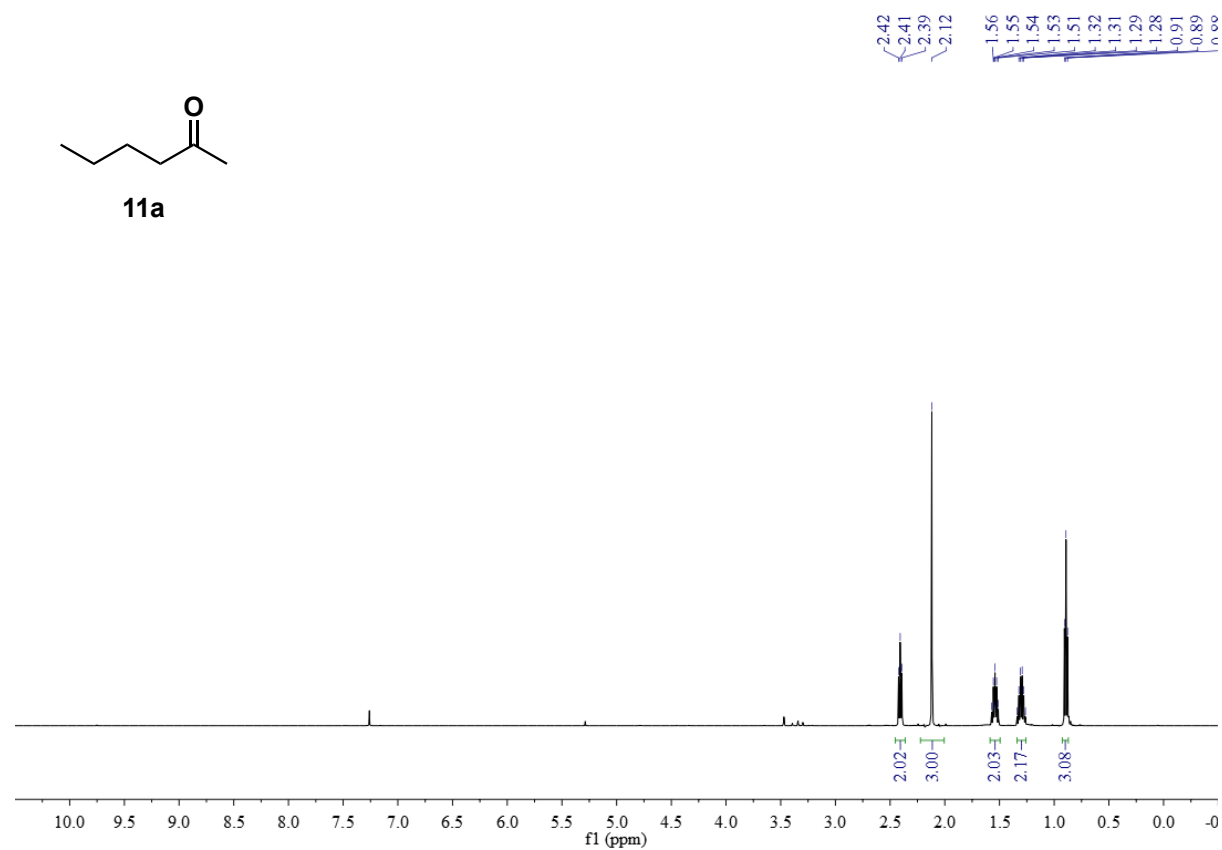

<sup>1</sup>H NMR (500 MHz, CDCl<sub>3</sub>) Spectrum of Compound **11a**.

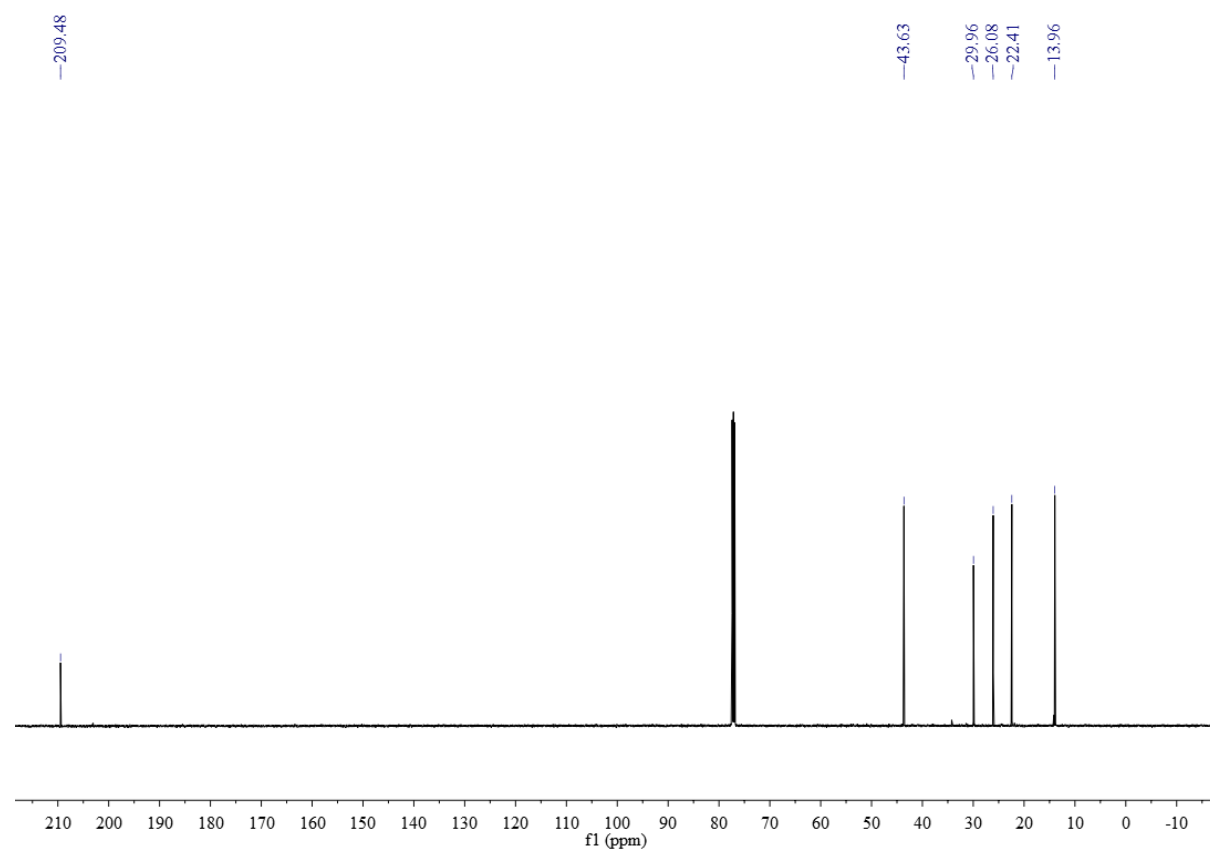

<sup>13</sup>C NMR (126 MHz, CDCl<sub>3</sub>) Spectrum of Compound **11a**.

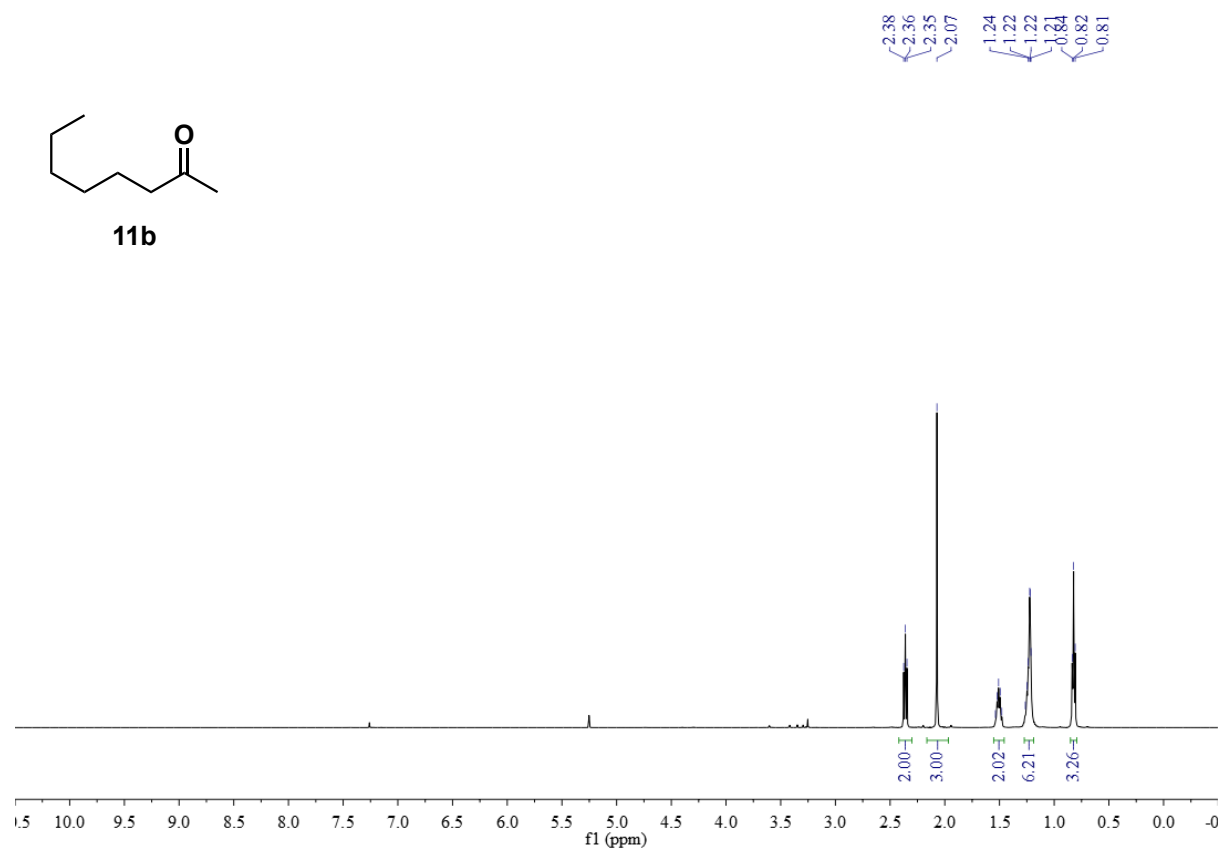

<sup>1</sup>H NMR (500 MHz, CDCl<sub>3</sub>) Spectrum of Compound **11b**.

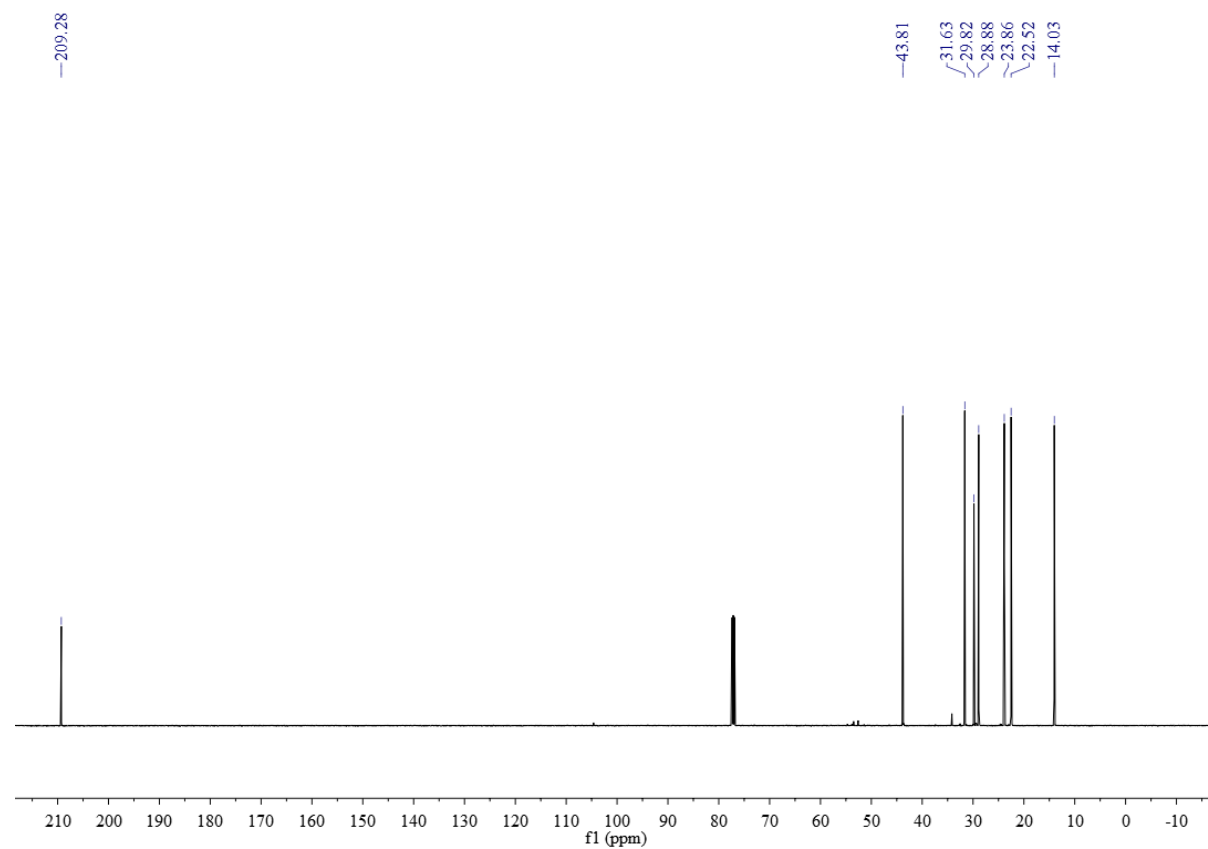

<sup>13</sup>C NMR (126 MHz, CDCl<sub>3</sub>) Spectrum of Compound **11b**.

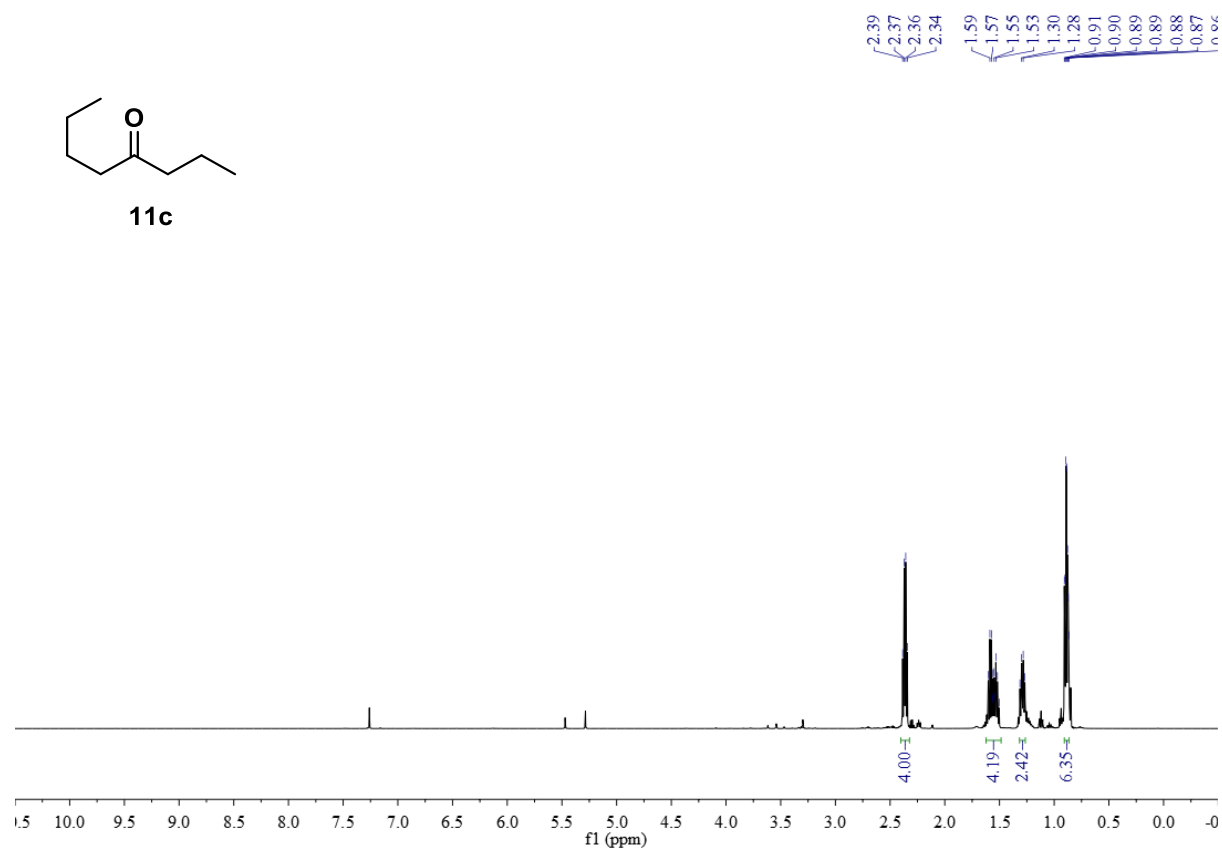

<sup>1</sup>H NMR (500 MHz, CDCl<sub>3</sub>) Spectrum of Compound **11c**.

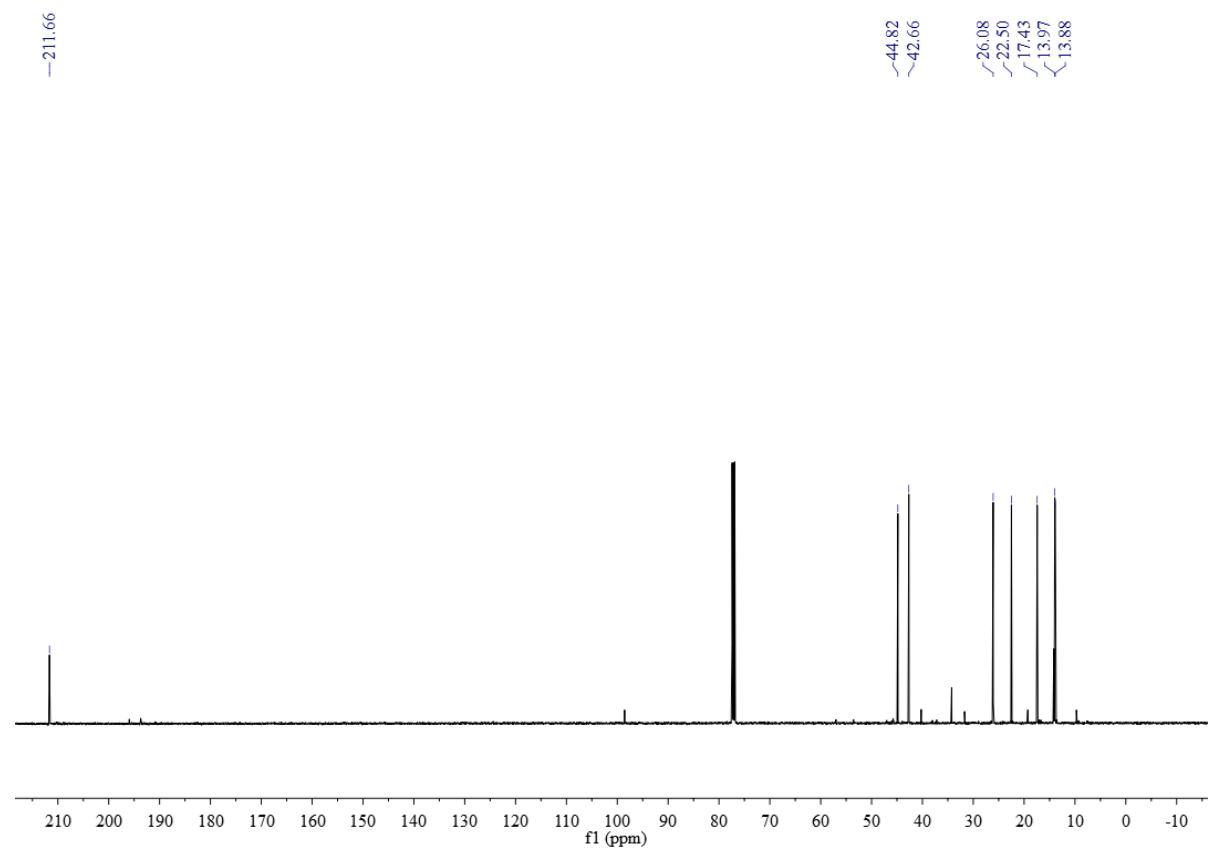

<sup>13</sup>C NMR (126 MHz, CDCl<sub>3</sub>) Spectrum of Compound **11c**.



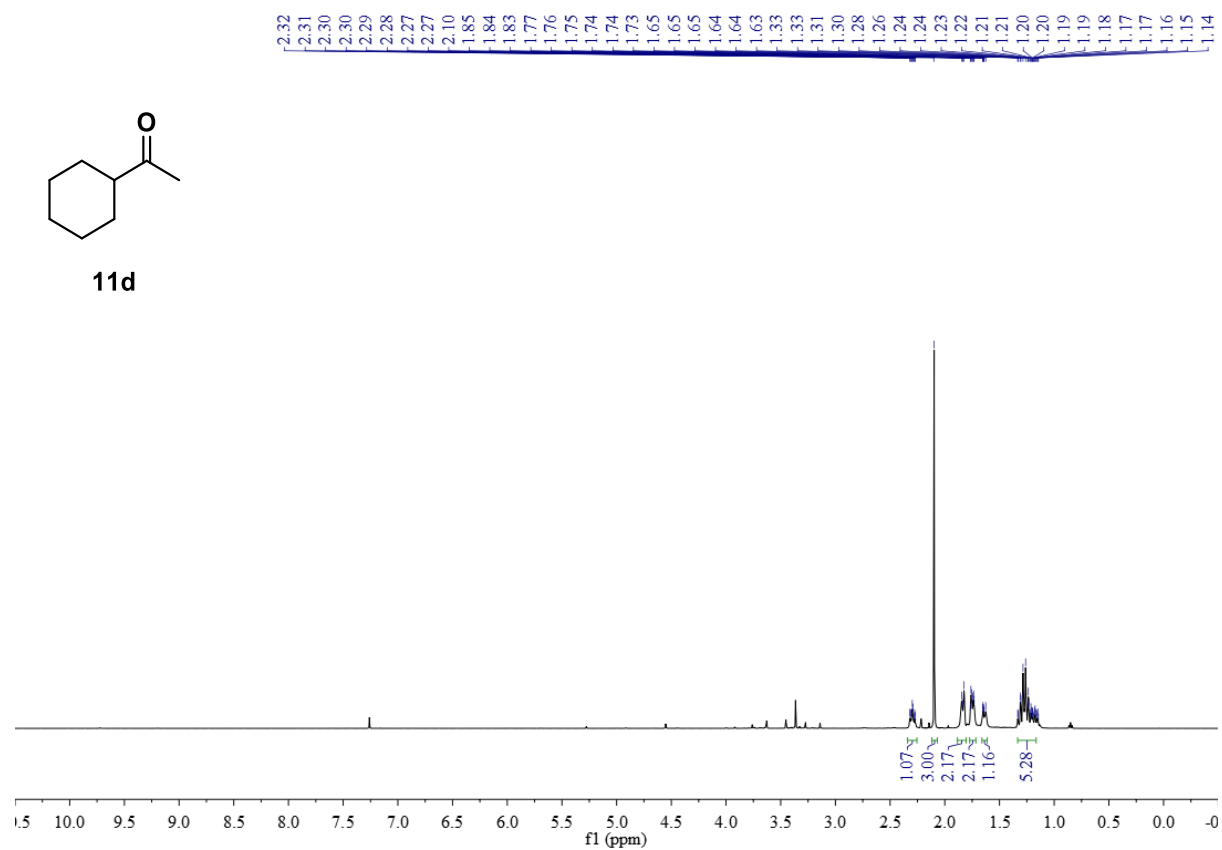

<sup>1</sup>H NMR (500 MHz, CDCl<sub>3</sub>) Spectrum of Compound **11d**.

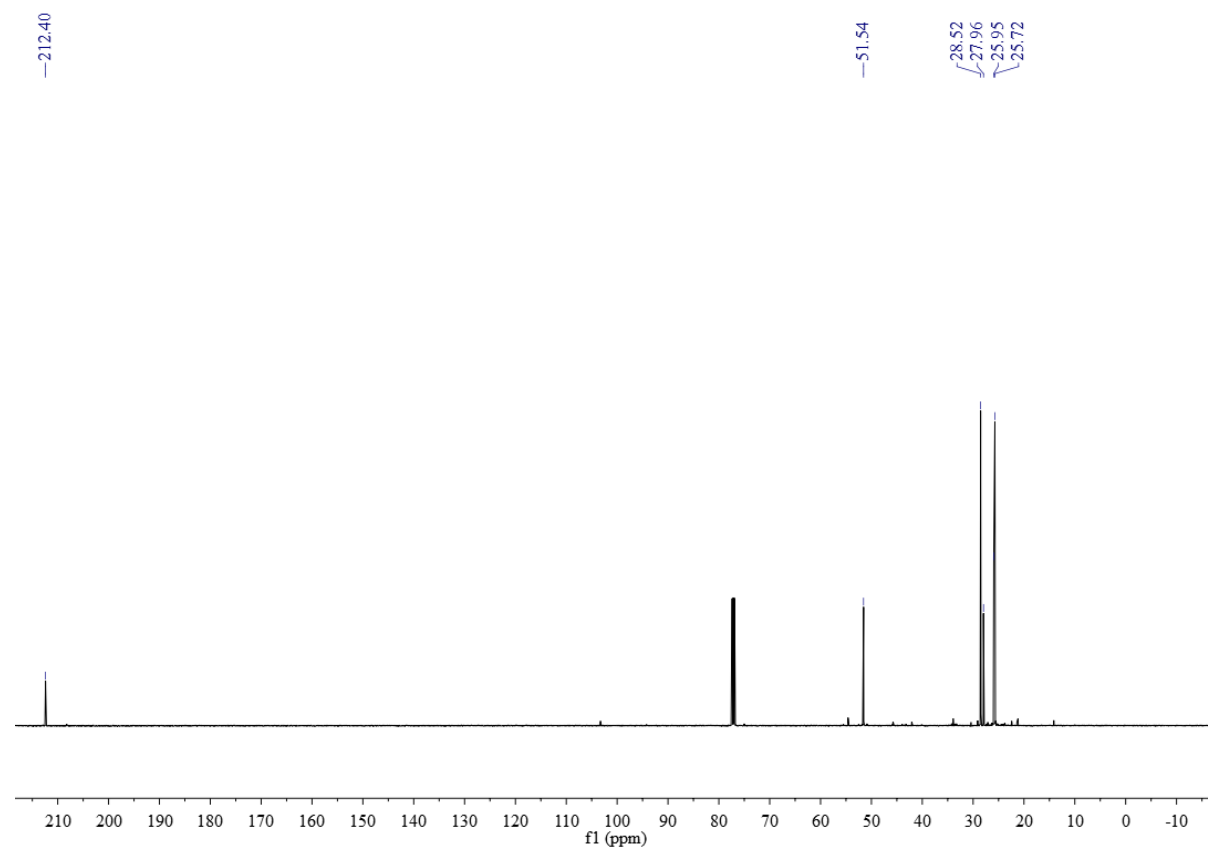

<sup>13</sup>C NMR (126 MHz, CDCl<sub>3</sub>) Spectrum of Compound **11d**.

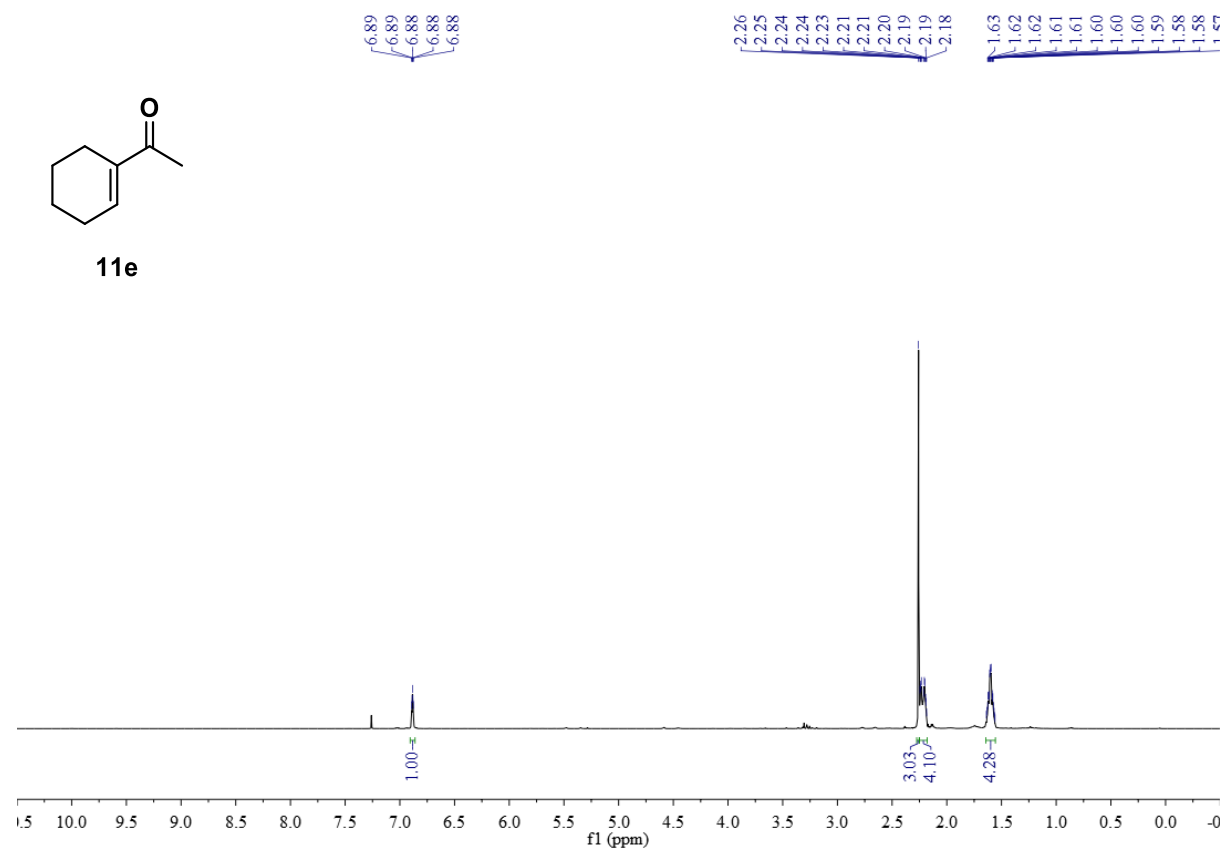

<sup>1</sup>H NMR (500 MHz, CDCl<sub>3</sub>) Spectrum of Compound **11e**.

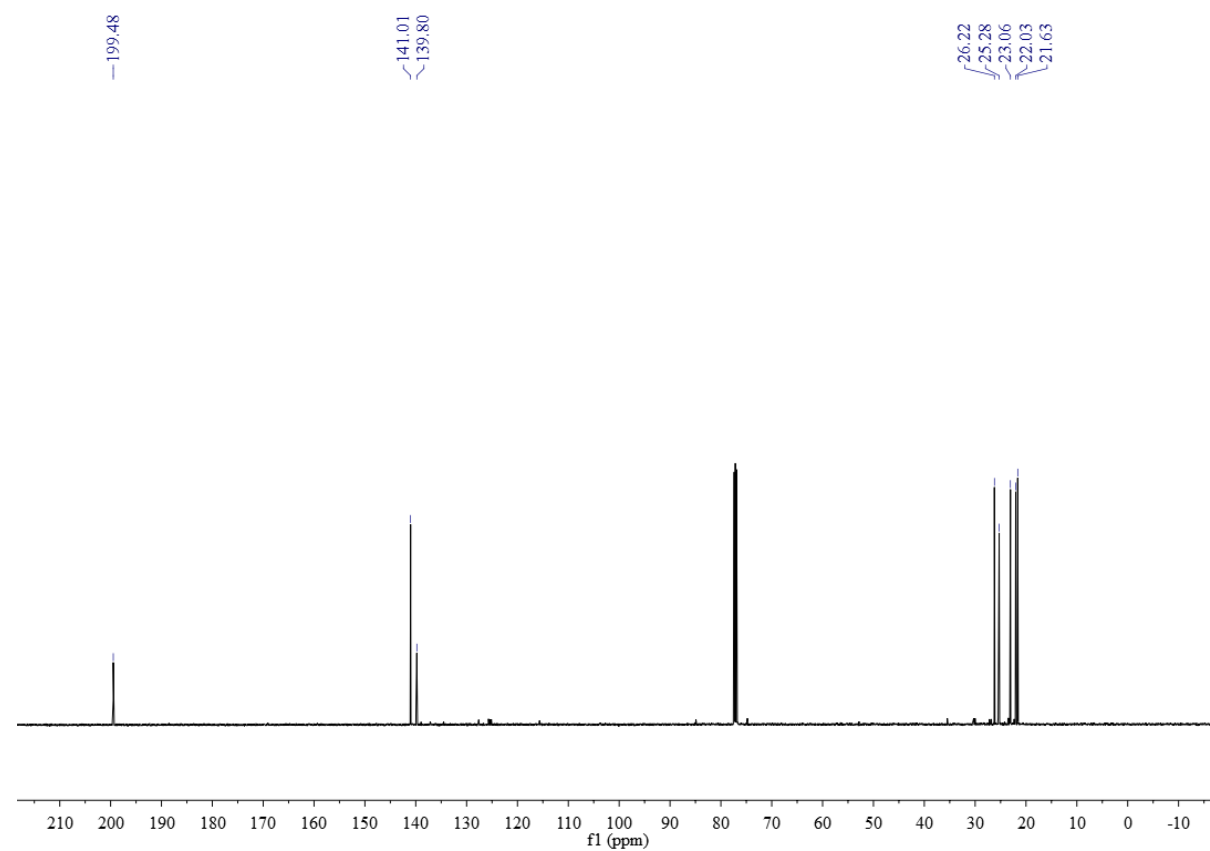

<sup>13</sup>C NMR (126 MHz, CDCl<sub>3</sub>) Spectrum of Compound **11e**.

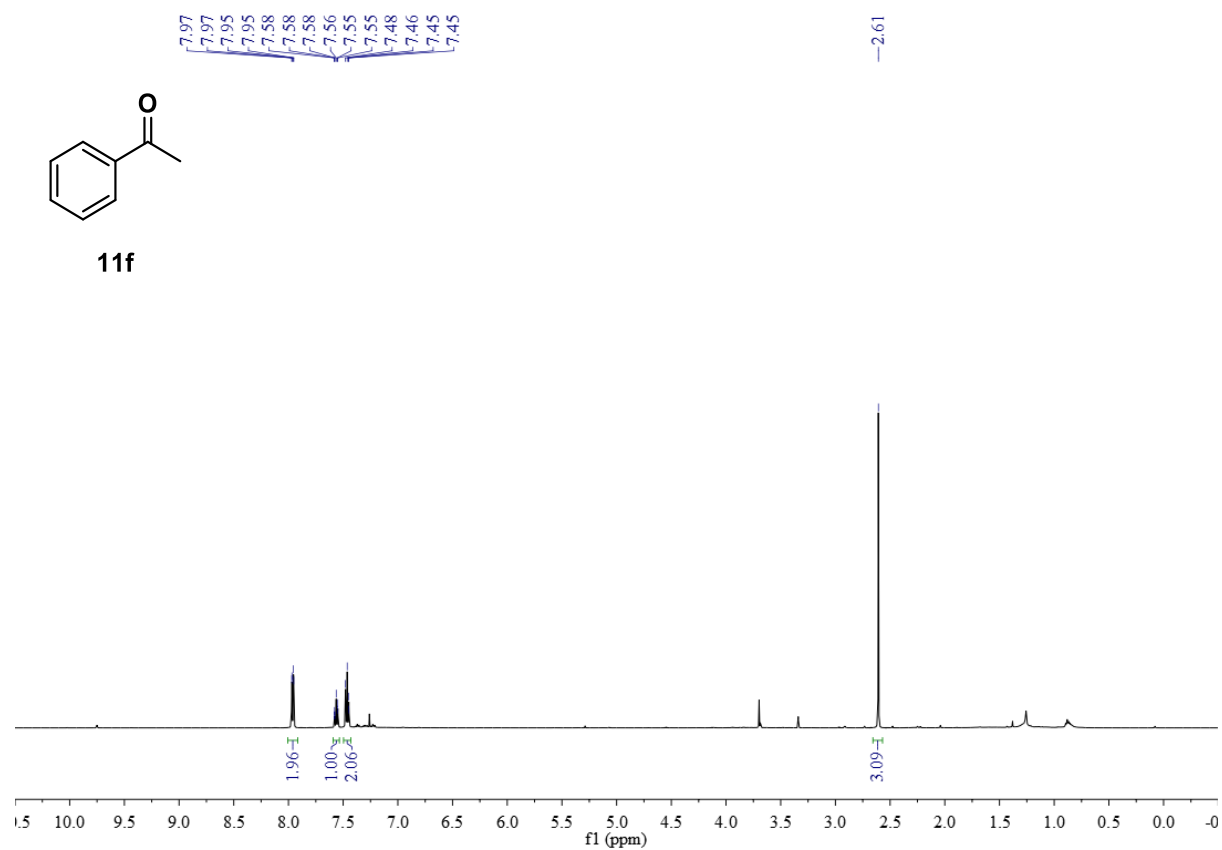

<sup>1</sup>H NMR (500 MHz, CDCl<sub>3</sub>) Spectrum of Compound **11f**.

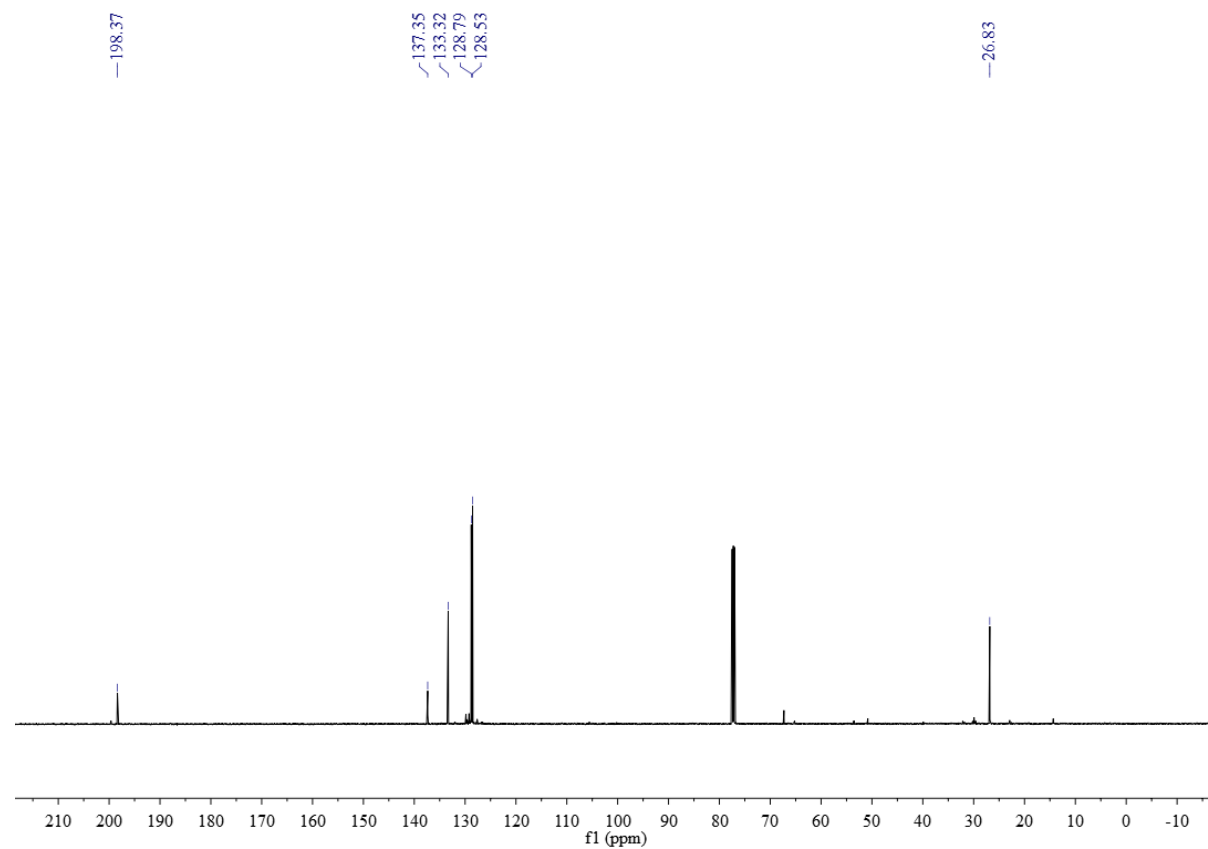

<sup>13</sup>C NMR (126 MHz, CDCl<sub>3</sub>) Spectrum of Compound **11f**.

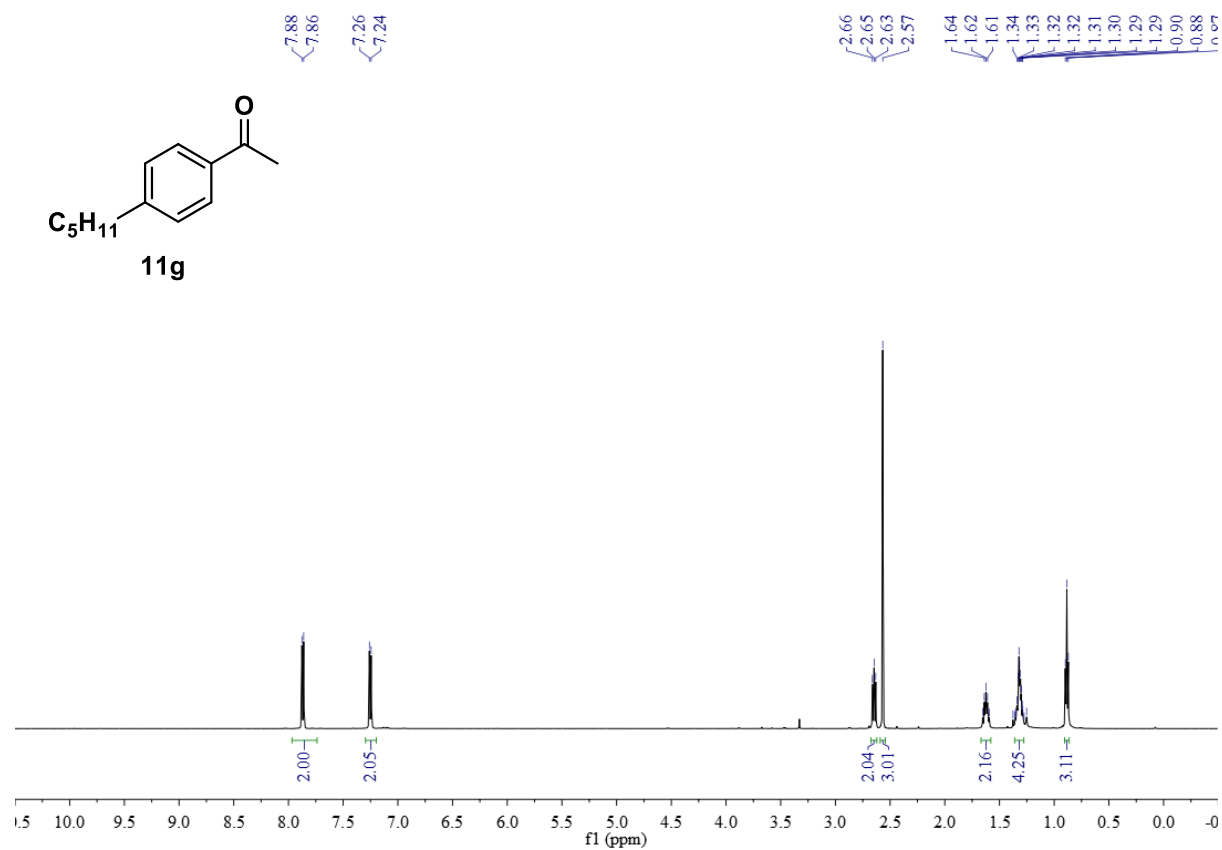

<sup>1</sup>H NMR (500 MHz, CDCl<sub>3</sub>) Spectrum of Compound **11g**.

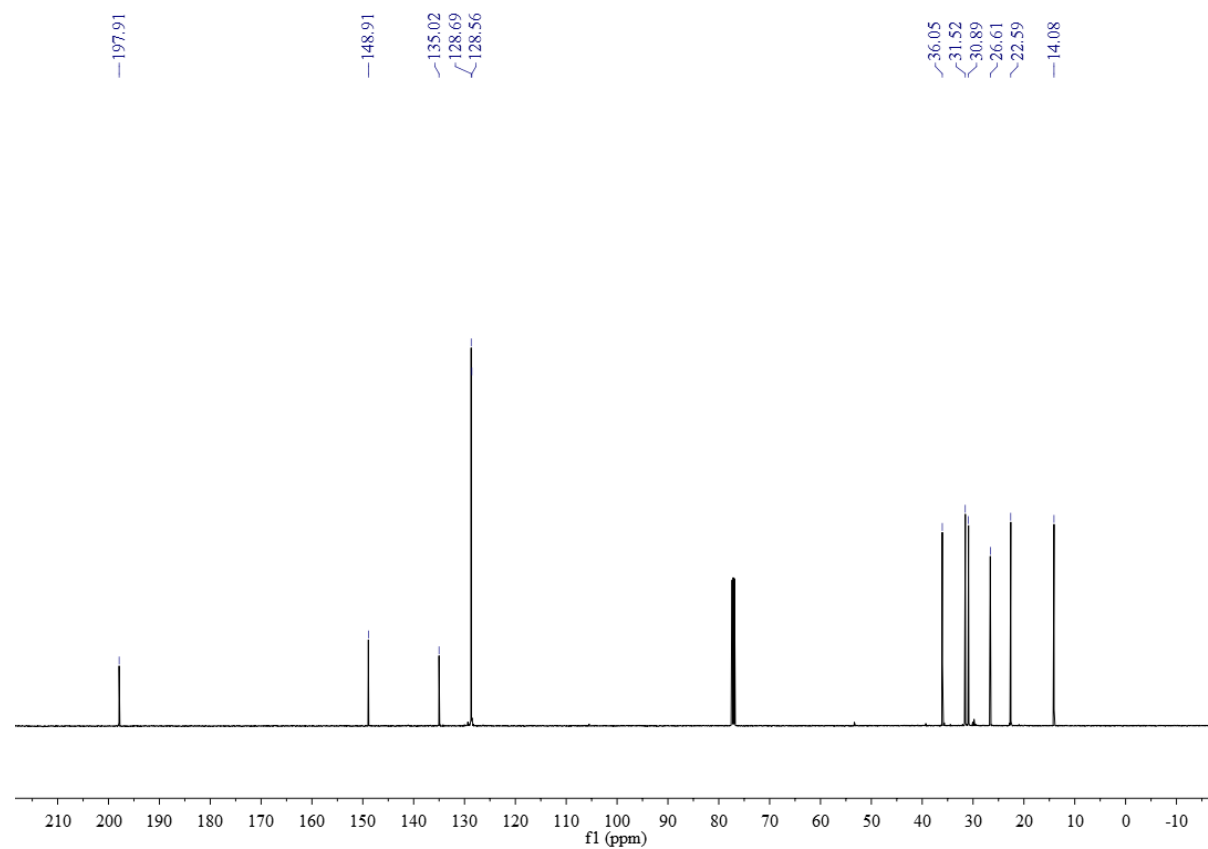

<sup>13</sup>C NMR (126 MHz, CDCl<sub>3</sub>) Spectrum of Compound **11g**.

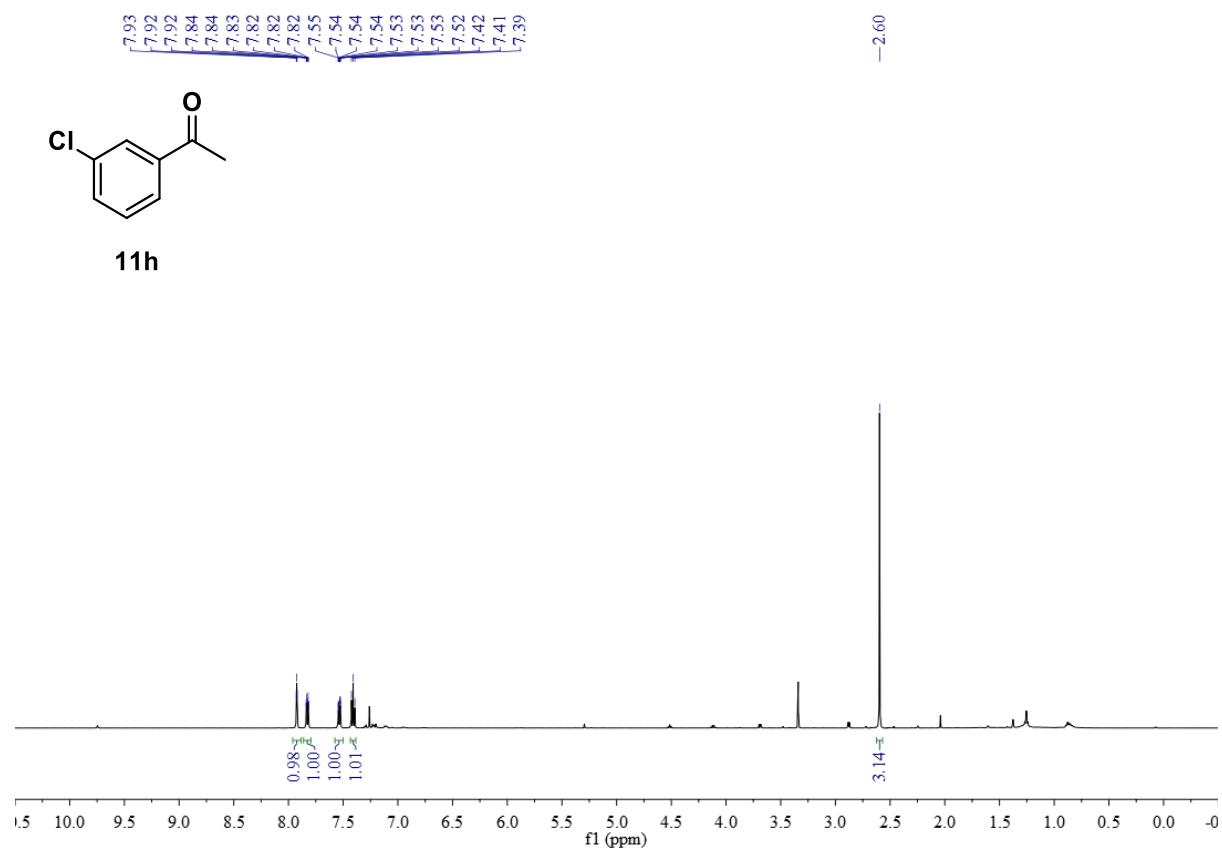

<sup>1</sup>H NMR (500 MHz, CDCl<sub>3</sub>) Spectrum of Compound **11h**.

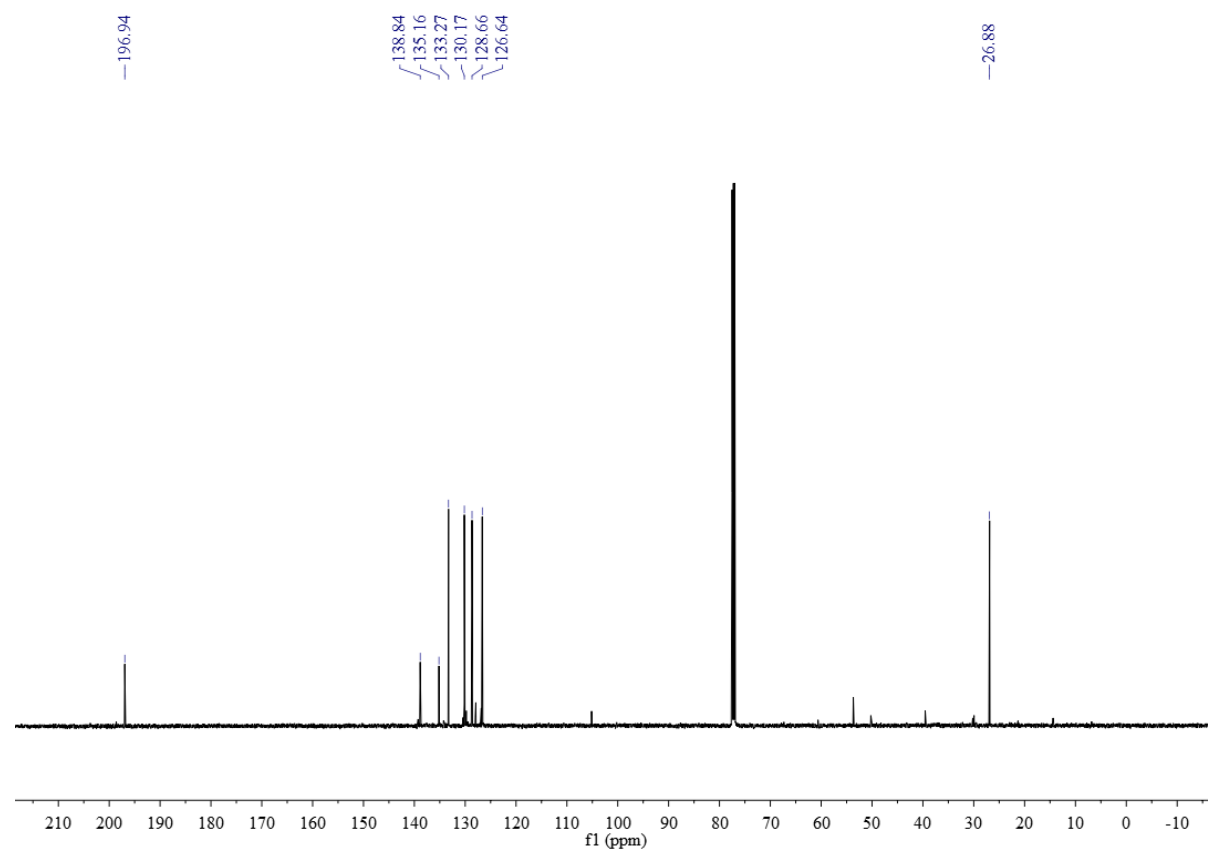

<sup>13</sup>C NMR (126 MHz, CDCl<sub>3</sub>) Spectrum of Compound **11h**.

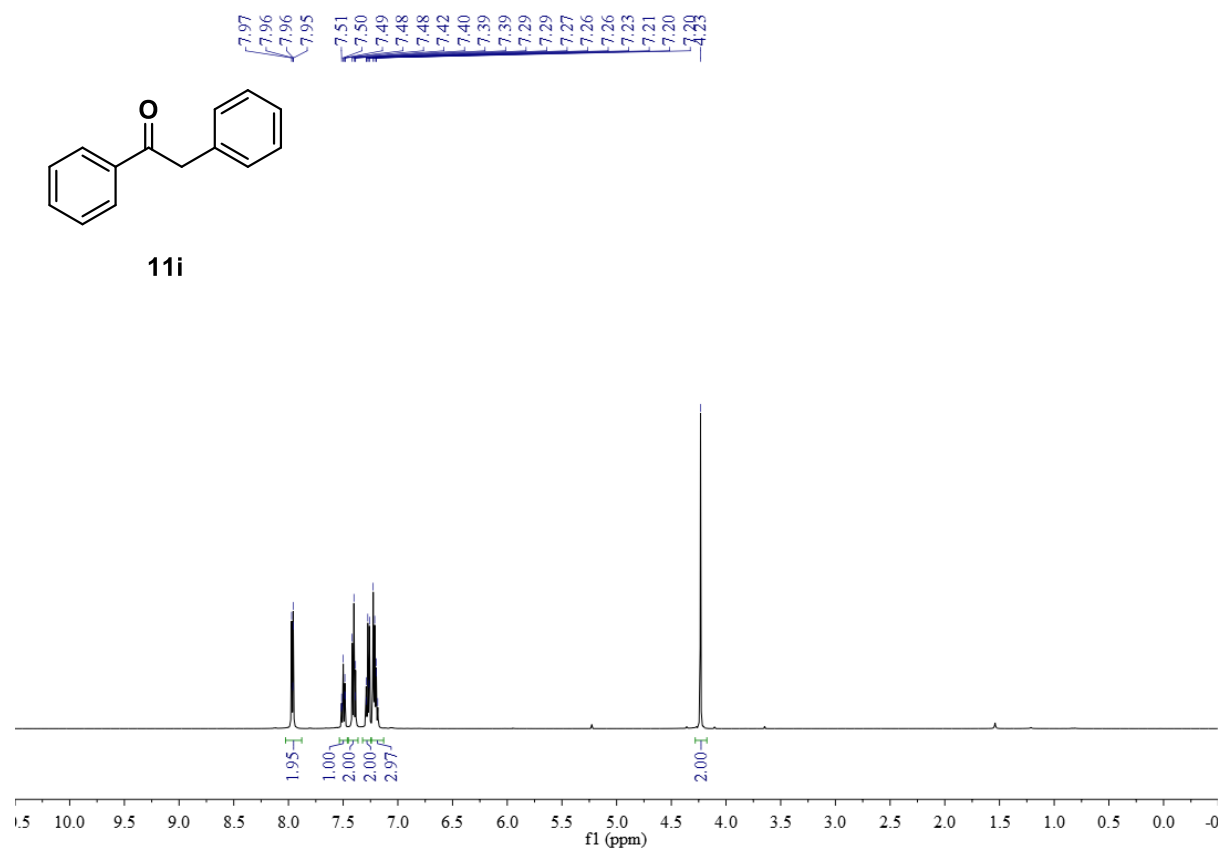

<sup>1</sup>H NMR (500 MHz, CDCl<sub>3</sub>) Spectrum of Compound **11i**.

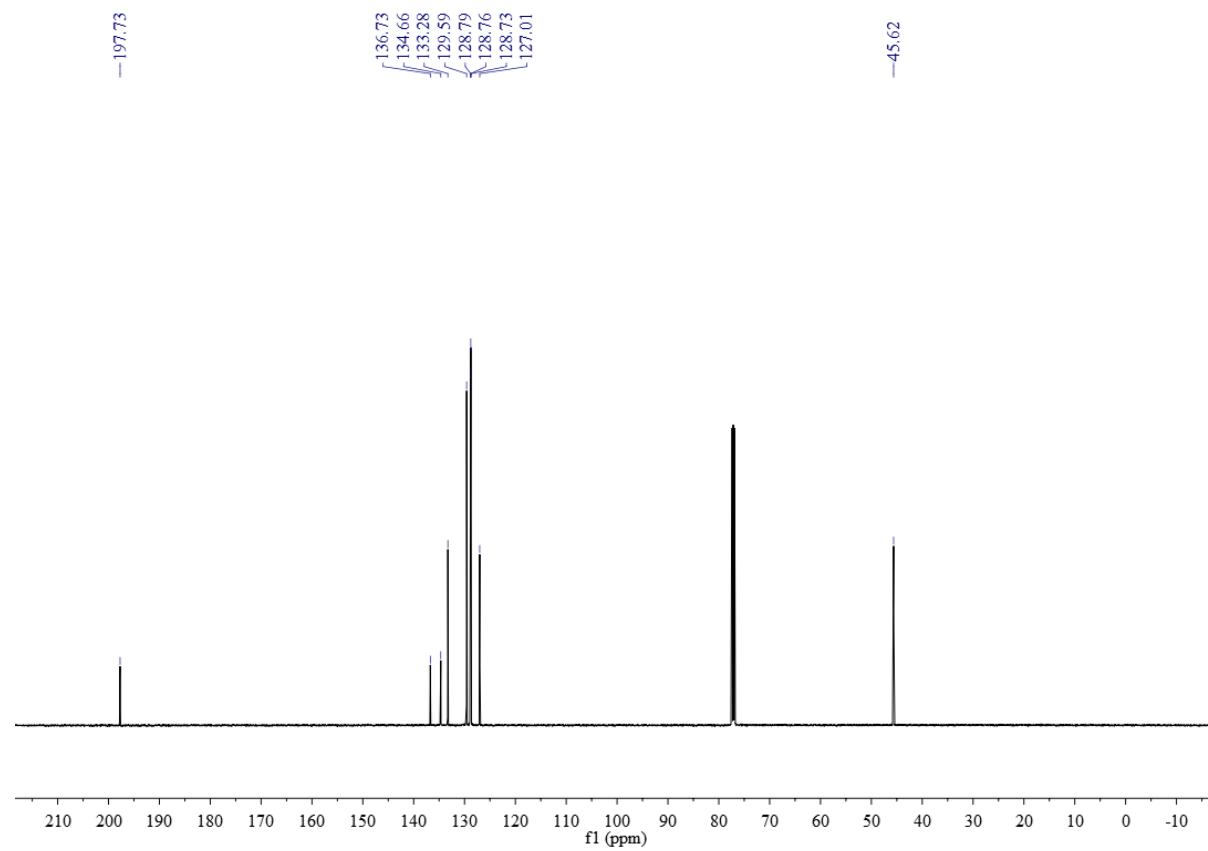

<sup>13</sup>C NMR (126 MHz, CDCl<sub>3</sub>) Spectrum of Compound **11i**.

**[Au (Np#) Cl] anti**

Energy: -4601.127345 au

Sum of electronic and thermal Energies: -4599.577268 au

Geometry:

|   |             |             |             |
|---|-------------|-------------|-------------|
| N | -1.07506000 | 0.19402200  | 1.01930600  |
| N | 1.07393200  | -0.00006200 | 1.00987900  |
| C | -0.00624100 | 0.07347600  | 0.17903700  |
| C | -0.66342300 | 0.19323300  | 2.34960800  |
| H | -1.36319500 | 0.28511800  | 3.16123900  |
| C | 0.68292100  | 0.07414900  | 2.34340400  |
| H | 1.39413200  | 0.02216100  | 3.14869500  |
| C | -2.45714200 | 0.28569300  | 0.60934700  |
| C | -3.13603200 | -0.91513100 | 0.23805000  |
| C | -2.48182900 | -2.17247300 | 0.19558500  |
| H | -1.43418100 | -2.22476600 | 0.46141300  |
| C | -3.12675300 | -3.32353700 | -0.20177000 |
| C | -4.49370100 | -3.23977000 | -0.55592600 |
| H | -5.01485800 | -4.13075300 | -0.88561700 |
| C | -5.16477400 | -2.04220300 | -0.50886600 |
| H | -6.21234800 | -2.02468700 | -0.77628900 |
| C | -4.51765800 | -0.83851700 | -0.12618400 |
| C | -2.35939000 | -4.64470800 | -0.26262600 |
| H | -1.31178300 | -4.37603600 | -0.43479300 |
| C | -2.38060700 | -5.42424500 | 1.05393000  |
| C | -1.32215600 | -6.29892200 | 1.33366800  |
| H | -0.50689800 | -6.39299600 | 0.62329300  |
| C | -1.30298600 | -7.05085200 | 2.50529900  |
| H | -0.47216400 | -7.71984600 | 2.70094600  |
| C | -2.34656700 | -6.94154200 | 3.42468300  |
| H | -2.33490900 | -7.52669000 | 4.33754400  |
| C | -3.40119600 | -6.07121600 | 3.16097200  |

|   |              |             |             |
|---|--------------|-------------|-------------|
| H | -4.21616800  | -5.97396100 | 3.87007400  |
| C | -3.41653500  | -5.31740000 | 1.98625900  |
| H | -4.24033800  | -4.63791100 | 1.80277400  |
| C | -2.77662300  | -5.48619900 | -1.47552300 |
| C | -2.38787800  | -5.05945200 | -2.75243400 |
| H | -1.79305500  | -4.15784700 | -2.85850500 |
| C | -2.76270400  | -5.77060200 | -3.88827200 |
| H | -2.45021700  | -5.42258200 | -4.86658400 |
| C | -3.53665600  | -6.92546700 | -3.76816500 |
| H | -3.82850900  | -7.48169800 | -4.65198900 |
| C | -3.92693400  | -7.35949800 | -2.50442600 |
| H | -4.52463300  | -8.25839500 | -2.39857300 |
| C | -3.54774400  | -6.64575500 | -1.36587700 |
| H | -3.84946100  | -7.00250600 | -0.38815900 |
| C | -5.18001300  | 0.43316500  | -0.11328500 |
| C | -6.65799200  | 0.52614600  | -0.51152000 |
| H | -6.76688600  | -0.08807300 | -1.41152100 |
| C | -7.60356900  | -0.07860800 | 0.53093500  |
| C | -7.30614400  | -0.10091800 | 1.89559500  |
| H | -6.35624500  | 0.28803800  | 2.24349000  |
| C | -8.21137400  | -0.62946900 | 2.81674400  |
| H | -7.96008100  | -0.63870600 | 3.87180700  |
| C | -9.42927000  | -1.14871300 | 2.38562400  |
| H | -10.13121300 | -1.56341100 | 3.10026100  |
| C | -9.73609700  | -1.13581000 | 1.02492700  |
| H | -10.67964200 | -1.54085300 | 0.67607400  |
| C | -8.83120700  | -0.60478500 | 0.11009900  |
| H | -9.08181800  | -0.59303400 | -0.94619100 |
| C | -7.09009200  | 1.93258500  | -0.93764000 |
| C | -7.75373800  | 2.81120500  | -0.07681600 |
| H | -7.99403300  | 2.49804600  | 0.93238000  |



|   |             |            |             |
|---|-------------|------------|-------------|
| C | -8.12701400 | 4.08478100 | -0.50730600 |
| H | -8.64371500 | 4.75090000 | 0.17508800  |
| C | -7.84607700 | 4.49773000 | -1.80705100 |
| H | -8.14056500 | 5.48570800 | -2.14274700 |
| C | -7.18665500 | 3.62860600 | -2.67536700 |
| H | -6.96270900 | 3.93781900 | -3.69016100 |
| C | -6.81402500 | 2.35923200 | -2.24237200 |
| H | -6.29722100 | 1.69139400 | -2.92451800 |
| C | -4.46215200 | 1.55155700 | 0.23847800  |
| H | -4.94499400 | 2.51929600 | 0.20622700  |
| C | -3.09335600 | 1.50979200 | 0.61180300  |
| C | -2.36333300 | 2.80098400 | 0.98513100  |
| H | -1.29950200 | 2.61145800 | 0.82375100  |
| C | -2.72018800 | 3.94922200 | 0.03161600  |
| C | -2.18023900 | 3.93668700 | -1.26074700 |
| H | -1.52442200 | 3.12597000 | -1.56289300 |
| C | -2.47671800 | 4.95023300 | -2.16682300 |
| H | -2.03956300 | 4.92586500 | -3.15829800 |
| C | -3.32366300 | 5.99434500 | -1.79546100 |
| H | -3.55464300 | 6.78613600 | -2.49940100 |
| C | -3.86662100 | 6.01538100 | -0.51383900 |
| H | -4.52577900 | 6.82302300 | -0.21501600 |
| C | -3.56461400 | 5.00079600 | 0.39537400  |
| H | -3.98437100 | 5.03754900 | 1.39381900  |
| C | -2.49726700 | 3.17889800 | 2.46368300  |
| C | -1.52982500 | 4.02125000 | 3.02830100  |
| H | -0.71596600 | 4.38448000 | 2.40889500  |
| C | -1.60101800 | 4.40675600 | 4.36304000  |
| H | -0.83998000 | 5.05916500 | 4.77690800  |
| C | -2.64848700 | 3.95537600 | 5.16727800  |
| H | -2.70653800 | 4.25323100 | 6.20806300  |

|   |             |             |             |
|---|-------------|-------------|-------------|
| C | -3.61671700 | 3.11904000  | 4.61996000  |
| H | -4.43671900 | 2.76248400  | 5.23375800  |
| C | -3.54049500 | 2.73393100  | 3.27940500  |
| H | -4.30242200 | 2.08056800  | 2.87204500  |
| C | 2.44192100  | -0.16105800 | 0.57593600  |
| C | 3.00182500  | -1.42182400 | 0.53009400  |
| C | 2.21458400  | -2.66991200 | 0.93163800  |
| H | 1.15823700  | -2.42299600 | 0.80468000  |
| C | 2.37708300  | -3.03363800 | 2.41108600  |
| C | 3.52946300  | -2.74332400 | 3.14714500  |
| H | 4.35529600  | -2.22481700 | 2.67547400  |
| C | 3.63334700  | -3.11140600 | 4.48982700  |
| H | 4.53735600  | -2.87663100 | 5.04120200  |
| C | 2.58421300  | -3.77562800 | 5.11968500  |
| H | 2.66394100  | -4.05934000 | 6.16311200  |
| C | 1.42915000  | -4.07178800 | 4.39572200  |
| H | 0.60331400  | -4.58908400 | 4.87117500  |
| C | 1.32969500  | -3.70328200 | 3.05709600  |
| H | 0.42741300  | -3.94698700 | 2.50587200  |
| C | 2.47084400  | -3.84533700 | -0.02234300 |
| C | 1.99309700  | -3.75292200 | -1.33710900 |
| H | 1.47421700  | -2.85520900 | -1.66021900 |
| C | 2.18386200  | -4.79424600 | -2.23999600 |
| H | 1.80399100  | -4.70184300 | -3.25121700 |
| C | 2.85882200  | -5.94959000 | -1.84414400 |
| H | 3.00612200  | -6.76308900 | -2.54566900 |
| C | 3.34021600  | -6.04952300 | -0.54219300 |
| H | 3.86809500  | -6.94206100 | -0.22437600 |
| C | 3.14638100  | -5.00484900 | 0.36384300  |
| H | 3.51778800  | -5.10253700 | 1.37689000  |
| C | 4.34701900  | -1.53794800 | 0.09549500  |

|   |             |             |             |
|---|-------------|-------------|-------------|
| H | 4.76549000  | -2.53271700 | 0.01529400  |
| C | 6.56812400  | -0.62956400 | -0.72750500 |
| H | 6.68057400  | 0.02067800  | -1.60146000 |
| C | 6.87690300  | -2.03956300 | -1.24038300 |
| C | 7.51335900  | -3.00468700 | -0.45499000 |
| H | 7.82232800  | -2.75968500 | 0.55441100  |
| C | 7.77101200  | -4.27883500 | -0.96159400 |
| H | 8.26749200  | -5.01342400 | -0.33694700 |
| C | 7.40031100  | -4.60591100 | -2.26331000 |
| H | 7.60442200  | -5.59487100 | -2.65795400 |
| C | 6.76786300  | -3.64982900 | -3.05712700 |
| H | 6.47524100  | -3.89155700 | -4.07277400 |
| C | 6.51019200  | -2.38006800 | -2.54808800 |
| H | 6.01256400  | -1.64428800 | -3.17216000 |
| C | 7.60109300  | -0.14623200 | 0.29541300  |
| C | 7.36070700  | -0.15165100 | 1.67126900  |
| H | 6.39626100  | -0.47400000 | 2.04602900  |
| C | 8.34237600  | 0.26647400  | 2.57070400  |
| H | 8.13401100  | 0.25763200  | 3.63501700  |
| C | 9.58106800  | 0.70045600  | 2.10640700  |
| H | 10.34232300 | 1.03010400  | 2.80438900  |
| C | 9.83193100  | 0.71384500  | 0.73422700  |
| H | 10.79134900 | 1.05353000  | 0.35982400  |
| C | 8.85068000  | 0.29357300  | -0.15902200 |
| H | 9.05748000  | 0.30100900  | -1.22479800 |
| C | 5.11931600  | -0.45539700 | -0.25602900 |
| C | 4.54311700  | 0.85529100  | -0.19184500 |
| C | 5.26181100  | 2.03293100  | -0.52913800 |
| H | 6.29937200  | 1.95983000  | -0.82485100 |
| C | 4.68081200  | 3.27453800  | -0.46872800 |
| H | 5.26871600  | 4.14843100  | -0.72178500 |

|    |             |             |             |
|----|-------------|-------------|-------------|
| C  | 3.33174900  | 3.43221300  | -0.06791200 |
| C  | 2.61458900  | 2.30649900  | 0.27166300  |
| H  | 1.58095900  | 2.41244000  | 0.57642900  |
| C  | 3.18282500  | 1.00580000  | 0.22356700  |
| C  | 2.67859600  | 4.81172500  | -0.01255300 |
| H  | 1.75131500  | 4.68258400  | 0.55730900  |
| C  | 2.25460600  | 5.35823700  | -1.38304400 |
| C  | 1.60351800  | 6.59915500  | -1.44142400 |
| H  | 1.44040000  | 7.16107300  | -0.52783300 |
| C  | 1.16756900  | 7.12399000  | -2.65303300 |
| H  | 0.66494100  | 8.08482300  | -2.67236000 |
| C  | 1.37065700  | 6.41512100  | -3.83817900 |
| H  | 1.03162800  | 6.82231300  | -4.78425300 |
| C  | 2.00379500  | 5.17763900  | -3.79260900 |
| H  | 2.15455000  | 4.60743500  | -4.70236300 |
| C  | 2.44093700  | 4.65300900  | -2.57400700 |
| H  | 2.91745700  | 3.68107200  | -2.56198100 |
| C  | 3.54059300  | 5.78818000  | 0.79547500  |
| C  | 4.45742600  | 6.65583000  | 0.19334800  |
| H  | 4.53386700  | 6.69057900  | -0.88734600 |
| C  | 5.26060400  | 7.49387300  | 0.96610700  |
| H  | 5.96455300  | 8.16000100  | 0.47930600  |
| C  | 5.15607900  | 7.48398300  | 2.35536600  |
| H  | 5.77699000  | 8.13975500  | 2.95526400  |
| C  | 4.24124100  | 6.62820300  | 2.96702100  |
| H  | 4.14599500  | 6.61578400  | 4.04731800  |
| C  | 3.44442000  | 5.78916600  | 2.19169100  |
| H  | 2.73909200  | 5.12160200  | 2.67720000  |
| Cl | 0.00108300  | -0.19693100 | -4.12555300 |
| Au | -0.00915200 | -0.02886300 | -1.82254900 |

**[Au (Np#) Cl] syn**

Energy: -4601.125764 au

Sum of electronic and thermal Energies: -4599.575343 au

Geometry:

|   |            |             |             |
|---|------------|-------------|-------------|
| N | 1.15209500 | -0.62068600 | 1.19950600  |
| C | 5.18522000 | -0.12426700 | -0.09989400 |
| C | 4.41416800 | 1.02269600  | 0.27796600  |
| C | 6.62818600 | 0.04838100  | -0.58589700 |
| H | 7.08464000 | 0.80195100  | 0.06364400  |
| C | 3.79782300 | -3.23894100 | 2.75206500  |
| H | 4.40990500 | -2.36686400 | 2.55531700  |
| C | 3.26052100 | -1.57944200 | 0.37957700  |
| C | 3.93996600 | -3.91253700 | 3.96762900  |
| H | 4.65713000 | -3.55328500 | 4.69767400  |
| C | 7.69585100 | -2.13633300 | -1.41921400 |
| H | 7.25671800 | -1.97132500 | -2.39587800 |
| C | 3.22203700 | -3.86219600 | -0.73495600 |
| C | 0.77923900 | -0.59347300 | 2.54076600  |
| H | 1.50470000 | -0.52063600 | 3.33161800  |
| C | 3.06124600 | 0.84450000  | 0.70985300  |
| C | 6.70980800 | 0.60792700  | -2.01048700 |
| C | 7.48538100 | -1.20645900 | -0.39745100 |
| C | 4.60026100 | -1.36638800 | -0.03618800 |
| H | 5.17947500 | -2.23416300 | -0.32107500 |
| C | 2.88581600 | -3.68128200 | 1.79099200  |
| C | 2.70272100 | -3.00410400 | 0.42862500  |
| H | 1.62458300 | -2.92349800 | 0.27257400  |
| C | 4.22341700 | -4.82368000 | -0.57297600 |
| H | 4.65058200 | -5.00087500 | 0.40698600  |
| C | 1.98373700 | 4.43691000  | 1.54009700  |
| H | 0.94559700 | 4.17262700  | 1.31223600  |

|   |             |             |             |
|---|-------------|-------------|-------------|
| C | 2.51479800  | -0.47530100 | 0.74004700  |
| C | 2.27087900  | 5.71898500  | 0.74839600  |
| C | 2.03819600  | 4.62310800  | 3.05791300  |
| C | 5.71666700  | 0.38013100  | -2.96643200 |
| H | 4.83078200  | -0.18616300 | -2.70429600 |
| C | 3.20351000  | 4.40958600  | 3.80138900  |
| H | 4.10659700  | 4.07366100  | 3.30515300  |
| C | 3.17331700  | -5.04128500 | 4.24003600  |
| H | 3.28753200  | -5.56700000 | 5.18141300  |
| C | 2.11680700  | -4.81786500 | 2.07916800  |
| H | 1.41298600  | -5.18595100 | 1.33926200  |
| C | 8.47431500  | -3.27272000 | -1.19884600 |
| H | 8.62376300  | -3.98258500 | -2.00480100 |
| C | 0.88466200  | 5.03841200  | 3.73371600  |
| H | -0.03030000 | 5.20839900  | 3.17522600  |
| C | 7.83426600  | 1.35607800  | -2.38071100 |
| H | 8.61776900  | 1.53932900  | -1.65148800 |
| C | 8.86313600  | -2.57039100 | 1.07031300  |
| H | 9.32111500  | -2.72748700 | 2.04082200  |
| C | 9.06062800  | -3.49458600 | 0.04480500  |
| H | 9.67063700  | -4.37506500 | 0.21295800  |
| C | 2.25850200  | -5.49317300 | 3.28738100  |
| H | 1.65839200  | -6.37503200 | 3.48409300  |
| C | 2.86013000  | 6.85063900  | 1.31616000  |
| H | 3.12440800  | 6.85133900  | 2.36661700  |
| C | 2.68322100  | -3.66476700 | -2.01251500 |
| H | 1.90731800  | -2.92091000 | -2.16361600 |
| C | 2.06403400  | 5.03030200  | 5.84207400  |
| H | 2.07439200  | 5.18500500  | 6.91520800  |
| C | 2.16791500  | 6.89215200  | -1.37967600 |
| H | 1.89129000  | 6.89924900  | -2.42806500 |

|   |             |             |             |
|---|-------------|-------------|-------------|
| C | 1.92799900  | 5.75788500  | -0.61056600 |
| H | 1.47618700  | 4.88623900  | -1.07365700 |
| C | 3.21779800  | 4.61403600  | 5.18094800  |
| H | 4.13197700  | 4.44294900  | 5.73901200  |
| C | 4.67658700  | -5.56908500 | -1.66205100 |
| H | 5.45392800  | -6.31110000 | -1.51578100 |
| C | 0.89504200  | 5.24041700  | 5.11228200  |
| H | -0.01159300 | 5.55877800  | 5.61500100  |
| C | 8.08277600  | -1.43882000 | 0.84758100  |
| H | 7.93645400  | -0.72282700 | 1.65087900  |
| C | 7.96470700  | 1.86198700  | -3.67096300 |
| H | 8.84211400  | 2.44157800  | -3.93642500 |
| C | 0.05649700  | -0.71716000 | 0.39339600  |
| C | 2.76107500  | 8.01574900  | -0.80217400 |
| H | 2.94911300  | 8.90138900  | -1.39863300 |
| C | 3.10552800  | 7.98972300  | 0.54586700  |
| H | 3.56401400  | 8.85798400  | 1.00663100  |
| C | 5.84499100  | 0.88458100  | -4.26127700 |
| H | 5.05987900  | 0.69960700  | -4.98579600 |
| C | 6.96793500  | 1.62634800  | -4.61809400 |
| H | 7.06484500  | 2.02220200  | -5.62278100 |
| C | 4.13318500  | -5.36570800 | -2.92800200 |
| H | 4.48254100  | -5.94870200 | -3.77302100 |
| C | 3.13323600  | -4.40863100 | -3.09989000 |
| H | 2.69771400  | -4.23869200 | -4.07812000 |
| N | -1.00210300 | -0.76315900 | 1.25486900  |
| C | -5.04910400 | -1.28320400 | -0.00247000 |
| C | -4.31960000 | -2.30665500 | 0.56141000  |
| H | -4.77708800 | -3.28562100 | 0.64738100  |
| C | -6.47275500 | -1.62251700 | -0.46462000 |
| H | -6.70125600 | -2.56255600 | 0.04945600  |

|   |             |             |             |
|---|-------------|-------------|-------------|
| C | -3.84856300 | 4.74640900  | 1.39644900  |
| H | -4.49729700 | 3.88286200  | 1.31763300  |
| C | -3.08001400 | 0.18010600  | 0.30562800  |
| C | -4.11197700 | 5.70896600  | 2.37390300  |
| H | -4.96409800 | 5.58155300  | 3.03273600  |
| C | -8.49894400 | -0.05504000 | -0.79744400 |
| H | -8.47154200 | -0.24999300 | -1.86251500 |
| C | -2.59622500 | 4.41301300  | -1.98610000 |
| C | -0.56933000 | -0.67984000 | 2.57550800  |
| H | -1.25594000 | -0.70853200 | 3.40288600  |
| C | -2.98106900 | -2.17002900 | 0.99990400  |
| C | -6.57447500 | -1.97125700 | -1.95386300 |
| C | -7.55349400 | -0.64982300 | 0.04193300  |
| C | -4.43114100 | 0.00128300  | -0.13997600 |
| C | -2.76035500 | 4.88402900  | 0.53124200  |
| C | -2.41981400 | 3.86644600  | -0.56251900 |
| H | -1.35003400 | 3.65665200  | -0.45317200 |
| C | -3.45076900 | 5.47622200  | -2.28836500 |
| H | -3.99184400 | 5.97645100  | -1.49368500 |
| C | -2.25763700 | -3.36882100 | 1.61493800  |
| H | -1.18699400 | -3.18940400 | 1.49187300  |
| C | -2.37912800 | -0.93570100 | 0.85317300  |
| C | -2.54670500 | -4.66267200 | 0.83994400  |
| C | -2.48674300 | -3.49278200 | 3.12525100  |
| C | -5.70187200 | -1.47884000 | -2.92773600 |
| H | -4.89234600 | -0.81540300 | -2.65366600 |
| C | -3.67031600 | -3.09279800 | 3.75334000  |
| H | -4.46949900 | -2.65148300 | 3.17046300  |
| C | -3.28864200 | 6.82303300  | 2.50510800  |
| H | -3.49394800 | 7.57025200  | 3.26357900  |
| C | -1.93490000 | 6.00844600  | 0.67799800  |



|   |              |             |             |
|---|--------------|-------------|-------------|
| H | -1.08424400  | 6.13776700  | 0.01667400  |
| C | -9.48108200  | 0.79235700  | -0.28135000 |
| H | -10.20184700 | 1.24556700  | -0.95318700 |
| C | -1.47075100  | -4.04333500 | 3.91677200  |
| H | -0.53931500  | -4.34982900 | 3.45308600  |
| C | -7.58350200  | -2.85754500 | -2.35660500 |
| H | -8.26372700  | -3.26321700 | -1.61387700 |
| C | -8.60598300  | 0.45925800  | 1.93351400  |
| H | -8.64171500  | 0.65072600  | 3.00051000  |
| C | -9.53928700  | 1.05427600  | 1.08428800  |
| H | -10.30324800 | 1.71113800  | 1.48466500  |
| C | -2.19354500  | 6.96810600  | 1.65187700  |
| H | -1.53945100  | 7.82807500  | 1.74466700  |
| C | -3.27725400  | -5.72505900 | 1.37631300  |
| H | -3.65818800  | -5.66288900 | 2.38863200  |
| C | -1.89974600  | 3.79486900  | -3.03295900 |
| H | -1.24291200  | 2.95657100  | -2.82269200 |
| C | -2.82044500  | -3.79855800 | 5.90516600  |
| H | -2.94879000  | -3.91401900 | 6.97551400  |
| C | -2.28974800  | -5.92688200 | -1.21870800 |
| H | -1.90036400  | -5.99569400 | -2.22815400 |
| C | -2.05480700  | -4.77988700 | -0.46744900 |
| H | -1.49244300  | -3.96113600 | -0.90576900 |
| C | -3.83708000  | -3.24574300 | 5.13077300  |
| H | -4.76376000  | -2.92851800 | 5.59645700  |
| C | -3.60690300  | 5.91124100  | -3.60552900 |
| H | -4.27411000  | 6.73890400  | -3.82066800 |
| C | -1.63286700  | -4.19592200 | 5.29115200  |
| H | -0.82889600  | -4.62003900 | 5.88253000  |
| C | -7.62677000  | -0.38282000 | 1.41553800  |
| H | -6.90358400  | -0.83537700 | 2.08621600  |

|    |             |             |             |
|----|-------------|-------------|-------------|
| C  | -7.72896400 | -3.22609600 | -3.69061700 |
| H  | -8.51623800 | -3.91530500 | -3.97596400 |
| C  | -3.02395300 | -6.98173900 | -0.67496300 |
| H  | -3.20835100 | -7.87634600 | -1.25903200 |
| C  | -3.51577000 | -6.87644500 | 0.62260600  |
| H  | -4.08521100 | -7.69128400 | 1.05634900  |
| C  | -5.84251100 | -1.84900100 | -4.26635800 |
| H  | -5.14628900 | -1.46009600 | -5.00078100 |
| C  | -6.85724900 | -2.71882700 | -4.65419800 |
| H  | -6.96225600 | -3.00857000 | -5.69366500 |
| C  | -2.90819100 | 5.29109200  | -4.63795700 |
| H  | -3.02825600 | 5.63089200  | -5.66062100 |
| C  | -2.05194100 | 4.22878800  | -4.34659600 |
| H  | -1.50420100 | 3.73356000  | -5.14046900 |
| C  | 4.92471500  | 2.34611700  | 0.23832700  |
| C  | 4.16535100  | 3.42549900  | 0.62082900  |
| C  | 2.83363600  | 3.25651600  | 1.06627400  |
| C  | 2.30586500  | 1.98317200  | 1.09032400  |
| H  | 5.93005000  | 2.52036500  | -0.12031200 |
| H  | 4.58601700  | 4.42237600  | 0.56197000  |
| H  | 1.28355200  | 1.84816900  | 1.42151500  |
| C  | -2.47195100 | 1.45586900  | 0.16722900  |
| C  | -3.12605400 | 2.52220900  | -0.40690700 |
| C  | -4.45076300 | 2.33015400  | -0.86851300 |
| C  | -5.07987700 | 1.11931900  | -0.72996500 |
| H  | -1.45274900 | 1.58625000  | 0.50709100  |
| H  | -4.97161900 | 3.14865900  | -1.35128300 |
| H  | -6.09203700 | 1.01362500  | -1.08991900 |
| Cl | -0.02303900 | -0.78659500 | -3.92221700 |
| Au | 0.01152100  | -0.75483000 | -1.61124900 |
